# Supplementary material
Source: PubMed Central journal article supplement (PMC6897493)

## Supporting Information

### Cyclopropanation of Benzene Rings by Oxidatively Generated $\alpha$ -Oxo Gold Carbene: One-Pot Access to Tetrahydropyranone-Fused Heptatrienes from Propargyl Benzyl Ethers

Kegong Ji, Liming Zhang

| Content                                                                                                                         | Page number |
|---------------------------------------------------------------------------------------------------------------------------------|-------------|
| <b>General</b>                                                                                                                  | S2          |
| <b>General procedure A:</b> Methods for the synthesis ((prop-2-ynyloxy)methyl)benzene derivatives                               | S2          |
| <b>Data of</b> ((prop-2-ynyloxy)methyl)benzene derivatives                                                                      | S2-3        |
| <b>General procedure B:</b> the preparation of tert-butyldimethyl(2-(prop-2-ynyl)-2,3-dihydro-1H-inden-2-yloxy)silane <b>1q</b> | S6          |
| <b>General procedure C:</b> Gold-catalyzed oxidative cyclopropanation and ring expansion to synthesis <b>3</b> .                | S7          |
| <b>General procedure D:</b> Gold-catalyzed oxidative cyclopropanation of <b>1p</b>                                              | S14         |
| <b>General procedure E:</b> Gold-catalyzed oxidative cyclopropanation of <b>1q</b>                                              | S14         |
| <b>General procedure F:</b> Gold-catalyzed oxidative cyclopropanation and ring expansion to synthesis <b>5</b>                  | S15         |
| <b>Reference:</b>                                                                                                               | S16         |
| <b>NMR of SM and product 3a-3o, 4p-4q, 5a, 5c and 5c'</b>                                                                       | S17         |

**General.** Ethyl acetate (ACS grade), hexanes (ACS grade), diethyl ether (ACS grade) and anhydrous 1, 2-dichloroethane (anhydride, 99.8%) were purchased from Fisher Scientific and used without further purification. Chlorobenzene (HPLC grade) was purchased from Acros without further purification. Methylene chloride and tetrahydrofuran were purified using MBraun Solvent Purifier. Commercially available reagents were used without further purification. Reactions were monitored by thin layer chromatography (TLC) using Sorbent Technologies' pre-coated silica gel plates. Flash column chromatography was performed over Sorbent Technologies' silica gel (230-400 mesh).  $^1\text{H}$  NMR and  $^{13}\text{C}$  NMR spectra were recorded on Varian 400 MHz, 500 MHz and 600 MHz spectrometers using residue solvent peaks as internal standards. Infrared spectra were recorded with a Perkin Elmer FT-IR spectrum 2000 spectro-meter and are reported in reciprocal centimeter ( $\text{cm}^{-1}$ ). Mass spectra were recorded with Micromass QTOF<sub>2</sub> Quadrupole/Time-of-Flight Tandem mass spectrometer using electron spray ionization or Waters GCT Premier time-of-flight mass spectrometer with a field ionization (FI) ion source.

**General procedure A: Methods for the synthesis ((prop-2-ynoxy)methyl)benzene derivatives**

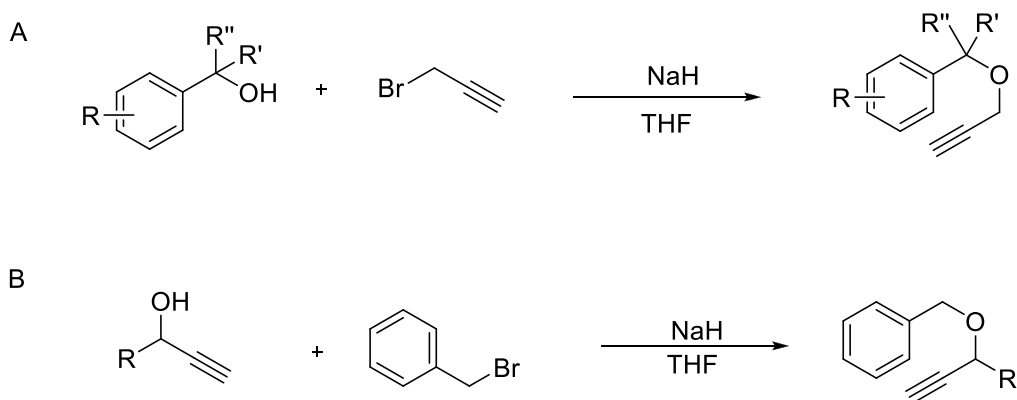

**Method A:** A solution of benzyl alcohol (5 mmol) was added a solution of NaH (6 mmol) in THF (ca. 20 mL) at 0 °C, after stirring for 30 minutes at room temperature, cool to 0 °C, propargyl bromide (80 % in toluene, 6 mmol) was added dropwise and the resulting slurry was efficiently stirred at room temperature for 6 h (for secondary benzyl alcohol, the reaction was

stirred at 50 °C for 6 h). NH<sub>4</sub>Cl (10.0 mL), which was extracted with Et<sub>2</sub>O. The combined organic phase was washed with water, brine, dried (Na<sub>2</sub>SO<sub>4</sub>) and concentrated. The mixture was purified by flash chromatography on silica gel (petroleum ether/EtOAc = 10:1) to give pure product as a colorless oil (70% yield).

**Method B:** To a stirred solution of propargyl alcohol (5 mmol) was added a solution of NaH (6 mmol) in THF (ca. 20 mL). After stirring for 30 minutes, freshly distilled benzyl bromide (6 mmol) was added dropwise and the resulting slurry was efficiently stirred at room temperature for 6 h. the mixture was quenched with aq. NH<sub>4</sub>Cl (10.0 mL), which was extracted with Et<sub>2</sub>O. The combined organic phase was washed with water, brine, dried (Na<sub>2</sub>SO<sub>4</sub>) and concentrated. The mixture was purified by flash chromatography on silica gel (petroleum ether/EtOAc = 10:1) to give pure product as a colorless oil (70% yield).

The known compound ((prop-2-ynyloxy)methyl)benzene derivatives **1a**,<sup>1</sup> **1b**,<sup>2</sup> **1c**,<sup>3</sup> **1d**,<sup>4</sup> **1e**,<sup>5</sup> **1i**,<sup>6</sup> **1j**,<sup>7</sup> **1k**,<sup>8</sup> **1m**,<sup>9</sup> **1n**,<sup>10</sup> **1p**,<sup>11</sup> was prepared according to the general procedure A and its spectroscopic data were in accordance with the literature data.

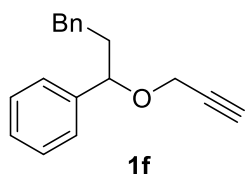

**(1-(prop-2-ynyloxy)propane-1,3-diyl)dibenzene 1f:** The compound **1f** was prepared in 83% yield through the General Procedure A. <sup>1</sup>H NMR (500 MHz, Chloroform-d) δ 7.39 – 7.34 (m, 2H), 7.33 – 7.26 (m, 5H), 7.22 – 7.16 (m, 3H), 4.47 (dd, *J* = 8.1, 5.3 Hz, 1H), 4.12 (dd, *J* = 15.7, 2.2 Hz, 1H), 3.86 (dd, *J* = 15.6, 2.2 Hz, 1H), 2.78 (ddd, *J* = 14.8, 9.8, 5.5 Hz, 1H), 2.72 – 2.62 (m, 1H), 2.41 (d, *J* = 2.8 Hz, 1H), 2.24 – 2.12 (m, 1H), 2.03 – 1.91 (m, 1H). <sup>13</sup>C NMR (126 MHz, CDCl<sub>3</sub>) δ 141.8, 141.1, 128.5, 128.5, 128.3, 127.9, 126.9, 125.8, 80.1, 80.0, 74.0, 55.6, 39.4, 32.0. IR (neat, cm<sup>-1</sup>): 3292, 3028, 2935, 1603, 1495, 1454, 1084, 750. GCMS (EI) calcd for C<sub>18</sub>H<sub>18</sub>O: 250.1, found: 250.0.

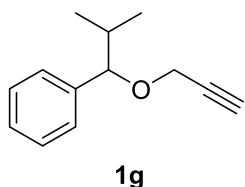

**(2-methyl-1-(prop-2-ynyloxy)propyl)benzene 1g:** The compound **1g** was prepared in 80% yield through the General Procedure A.  $^1\text{H}$  NMR (500 MHz, Chloroform-d)  $\delta$  7.34 (t,  $J = 7.1$  Hz, 2H), 7.30 – 7.25 (m, 3H), 4.18 – 4.05 (m, 2H), 3.82 (dd,  $J = 15.7, 2.3$  Hz, 1H), 2.38 (t,  $J = 2.4$  Hz, 1H), 1.96 (dq,  $J = 13.8, 6.9$  Hz, 1H), 1.03 (d,  $J = 6.6$  Hz, 3H), 0.74 (d,  $J = 6.8$  Hz, 3H).  $^{13}\text{C}$  NMR (126 MHz,  $\text{CDCl}_3$ )  $\delta$  140.1, 128.1, 127.6, 86.4, 80.2, 73.7, 55.8, 34.5, 19.1, 19.0. IR (neat,  $\text{cm}^{-1}$ ): 3304, 2960, 1453, 1385, 1074, 768. GCMS (EI) calcd for  $\text{C}_{13}\text{H}_{16}\text{O}$ : 188.1, found: 188.1.

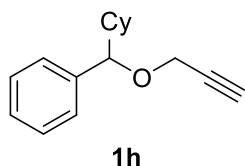

**(cyclohexyl(prop-2-ynyloxy)methyl)benzene 1h:** The compound **1h** was prepared in 80% yield through the General Procedure A.  $^1\text{H}$  NMR (600 MHz, Chloroform-d)  $\delta$  7.34 (t,  $J = 7.3$  Hz, 2H), 7.29 (d,  $J = 7.2$  Hz, 1H), 7.26 (d,  $J = 7.3$  Hz, 2H), 4.15 (d,  $J = 7.7$  Hz, 1H), 4.08 (dd,  $J = 15.5, 2.2$  Hz, 1H), 3.80 (dd,  $J = 15.7, 1.7$  Hz, 1H), 2.37 (t,  $J = 1.5$  Hz, 1H), 2.12 – 2.05 (m, 1H), 1.75 (dd,  $J = 14.3, 3.5$  Hz, 1H), 1.64 (ddq,  $J = 16.7, 9.0, 4.7, 4.3$  Hz, 3H), 1.29 (d,  $J = 13.1$  Hz, 1H), 1.22 (dtd,  $J = 12.8, 9.2, 3.3$  Hz, 1H), 1.12 (q,  $J = 11.1, 10.6$  Hz, 2H), 1.08 – 1.00 (m, 1H), 0.91 (qd,  $J = 12.3, 3.6$  Hz, 1H).  $^{13}\text{C}$  NMR (151 MHz,  $\text{cdCl}_3$ )  $\delta$  140.1, 128.1, 127.7, 127.6, 85.7, 80.3, 73.7, 55.7, 44.0, 29.6, 29.3, 26.5, 26.0, 25.9. IR (neat,  $\text{cm}^{-1}$ ): 3307, 2925, 2853, 1451, 1069, 759. GCMS (EI) calcd for  $\text{C}_{16}\text{H}_{20}\text{O}$ : 228.2, found: 228.2.

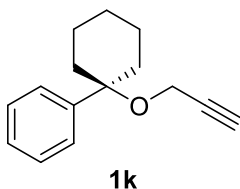

**(1-(prop-2-ynyloxy)cyclohexyl)benzene 1k:** The known compound **1k** was prepared in 45% yield through the General Procedure A and its spectroscopic data were in accordance with the literature data.  $^8\text{H}$  NMR (500 MHz, Chloroform-d)  $\delta$  7.44 (d,  $J = 7.6$  Hz, 2H), 7.36 (t,  $J = 7.6$  Hz, 2H), 7.30 – 7.21 (m, 1H), 3.74 (dd,  $J = 2.4, 0.8$  Hz, 2H), 2.36 (td,  $J = 2.4, 0.8$  Hz, 1H), 2.04 (dd,  $J = 14.1, 3.1$  Hz, 2H), 1.89 – 1.66 (m, 5H), 1.64 – 1.48 (m, 2H), 1.27 (dddd,  $J = 16.0, 12.2, 7.7, 3.8$  Hz, 1H).  $^{13}\text{C}$  NMR (126 MHz,  $\text{CDCl}_3$ )  $\delta$  145.1, 128.4, 127.2, 126.0, 81.1, 78.8, 73.0,



50.6, 35.7, 25.6, 22.0. IR (neat,  $\text{cm}^{-1}$ ):3293, 2935, 2859, 1447, 1061, 760. GCMS (EI) calcd for  $\text{C}_{15}\text{H}_{18}\text{O}$ : 214.1, found: 214.1.

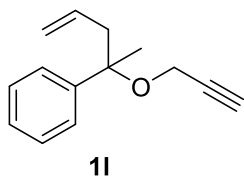

**(2-(prop-2-ynoxy)pent-4-en-2-yl)benzene 1l:** The compound **1l** was prepared in 65% yield through the General Procedure A.  $^1\text{H}$  NMR (600 MHz, Chloroform- $d$ )  $\delta$  7.39 (d,  $J = 7.7$  Hz, 2H), 7.36 (t,  $J = 7.6$  Hz, 2H), 7.30 – 7.25 (m, 1H), 5.66 (ddt,  $J = 17.4, 10.6, 7.1$  Hz, 1H), 5.17 – 4.91 (m, 2H), 3.98 – 3.75 (m, 2H), 2.61 (dd,  $J = 14.0, 7.3$  Hz, 1H), 2.54 (dd,  $J = 13.9, 7.2$  Hz, 1H), 2.38 (t,  $J = 2.5$  Hz, 1H), 1.57 (s, 3H).  $^{13}\text{C}$  NMR (151 MHz,  $\text{cdCl}_3$ )  $\delta$  143.9, 133.8, 128.30, 127.3, 126.2, 117.9, 81.1, 80.1, 73.2, 51.3, 47.5, 23.0. IR (neat,  $\text{cm}^{-1}$ ):3299, 2981, 1447, 1378, 1060, 918, 766. GCMS (EI) calcd for  $\text{C}_{14}\text{H}_{16}\text{O}$ : 200.12, found: 200.13.

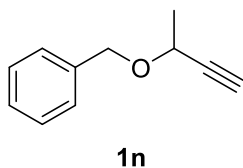

**((but-3-yn-2-yloxy)methyl)benzene 1n:** The known compound **1n** was prepared in 90% yield through the General Procedure A, method B and its spectroscopic data were in accordance with the literature data.<sup>10</sup>  $^1\text{H}$  NMR (500 MHz, Chloroform- $d$ )  $\delta$  7.40 – 7.33 (m, 4H), 7.32 – 7.26 (m, 1H), 4.80 (d,  $J = 11.6$  Hz, 1H), 4.52 (d,  $J = 11.6$  Hz, 1H), 4.22 (qd,  $J = 6.5, 2.0$  Hz, 1H), 2.47 (d,  $J = 2.4$  Hz, 1H), 1.49 (d,  $J = 6.6$  Hz, 3H).  $^{13}\text{C}$  NMR (126 MHz,  $\text{CDCl}_3$ )  $\delta$  137.8, 128.4, 128.0, 127.7, 83.7, 73.1, 70.5, 64.2, 22.0. IR (neat,  $\text{cm}^{-1}$ ):3295, 2989, 1455, 1328, 1065, 1099, 738. GCMS (EI) calcd for  $\text{C}_{11}\text{H}_{12}\text{O}$ : 160.1, found: 160.0.

**General procedure B: for the preparation of tert-butyldimethyl(2-(prop-2-ynyl)-2,3-dihydro-1H-inden-2-yloxy)silane 1q:**

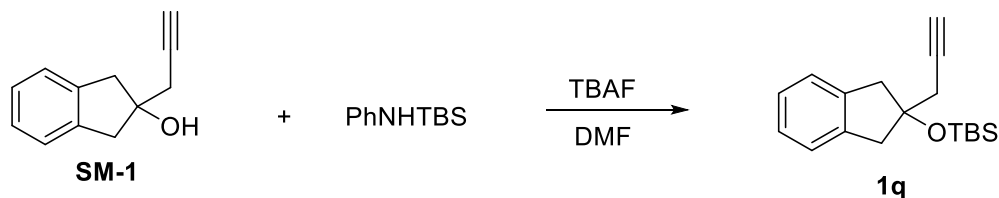

TBAF (1 M THF solution; 0.2 mL, 0.2 mmol) was added to a stirred solution of 2-(prop-2-ynyl)-2,3-dihydro-1H-inden-2-ol (2.0 mmol) and PhNHTBS (3.0 mmol) in DMF (4.0 mL) at 20–25 °C under an Ar atmosphere. After stirring at the same temperature for 4 hours, the mixture was quenched with water (10.0 mL), which was extracted with Et<sub>2</sub>O. The combined organic phase was washed with water, brine, dried (Na<sub>2</sub>SO<sub>4</sub>) and concentrated. The obtained crude product was purified by SiO<sub>2</sub> column chromatography (hexane) to tert-butyldimethyl(2-(prop-2-ynyl)-2,3-dihydro-1H-inden-2-yloxy)silane **1q** (75%); colorless oil.

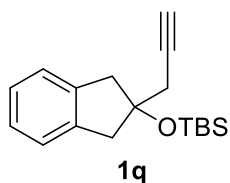

**tert-butyldimethyl(2-(prop-2-ynyl)-2,3-dihydro-1H-inden-2-yloxy)silane 1q:** <sup>1</sup>H NMR (600 MHz, Chloroform-d) δ 7.16 (q, *J* = 5.0 Hz, 4H), 3.22 (d, *J* = 16.0 Hz, 2H), 3.02 (d, *J* = 16.0 Hz, 2H), 2.56 (d, *J* = 2.7 Hz, 2H), 2.01 (d, *J* = 2.7 Hz, 1H), 0.83 (s, 9H), -0.03 (s, 6H). <sup>13</sup>C NMR (151 MHz, cdcl<sub>3</sub>) δ 141.3, 126.5, 124.7, 83.6, 81.9, 70.6, 46.1, 31.6, 25.7, 18.1, -2.8. IR (neat, cm<sup>-1</sup>): 3312, 2955, 2929, 1462, 1254, 1120, 1085, 774. GCMS (EI) calcd for C<sub>18</sub>H<sub>26</sub>OSi: 286.18, found: 286.20.

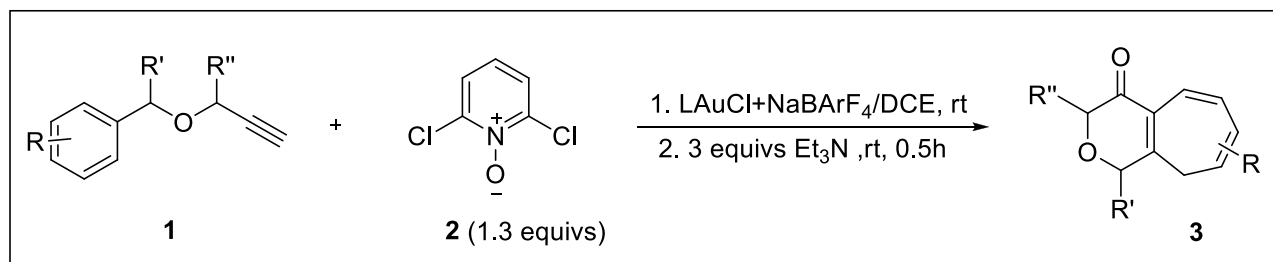

**General procedure C for gold-catalyzed oxidative cyclopropanation and ring expansion:**

2,6-dichloropyridine N-oxide **2c** (42.4 mg, 0.26 mmol), and Me<sub>4</sub><sup>t</sup>BuXPhosAuCl (7.1 mg, 0.010 mmol, 5 mol %) and NaBARF<sub>4</sub> (13 mg, 0.015 mmol, 7.5 mol %) were added sequentially to a solution of the propargyl benzyl ethers **1** (0.20 mmol) in DCE (4 mL, 0.05M) at room temperature. The resulting reaction mixture was stirred at RT, and the progress of the reaction was monitored by TLC. The reaction typically took 1–3 h. Upon completion, the reaction mixture was added 3 equiv. Et<sub>3</sub>N and stirred for 0.5 h at room temperature. The reaction mixture was concentrated under vacuum. The residue was purified by chromatography on silica gel

(eluent: hexanes/ethyl acetate) to afford the desired product **3**.

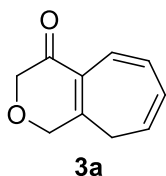

**3,9-dihydrocyclohepta[c]pyran-4(1H)-one 3a:** The compound **3a** was prepared in 69% yield according to the general procedure **C** (eluents: ethyl acetate: hexanes = 1:10). <sup>1</sup>H NMR (500 MHz, Chloroform-d)  $\delta$  7.23 (d,  $J$  = 11.4 Hz, 1H), 6.70 (dd,  $J$  = 11.4, 5.6 Hz, 1H), 6.30 (dd,  $J$  = 9.3, 5.5 Hz, 1H), 5.47 (dt,  $J$  = 9.3, 6.7 Hz, 1H), 4.56 (s, 2H), 4.17 (s, 2H), 2.42 (d,  $J$  = 6.7 Hz, 2H). <sup>13</sup>C NMR (126 MHz, CDCl<sub>3</sub>)  $\delta$  193.3, 144.9, 131.2, 129.3, 128.8, 124.9, 119.9, 71.7, 69.0, 29.5. IR (neat, cm<sup>-1</sup>): 3028, 1683, 1435, 1314, 1121, 722. MS (ESI/[M+Na]<sup>+</sup>) calcd for C<sub>10</sub>H<sub>10</sub>NaO<sub>2</sub><sup>+</sup>: 185.06, found: 185.06.

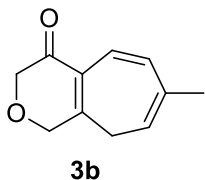

**7-methyl-3,9-dihydrocyclohepta[c]pyran-4(1H)-one 3b:** The compound **3b** was prepared in 65% yield according to the general procedure **C** (eluents: ethyl acetate: hexanes = 1:10). <sup>1</sup>H NMR (600 MHz, Chloroform-d)  $\delta$  7.10 (d,  $J$  = 11.5 Hz, 1H), 6.58 (d,  $J$  = 11.5 Hz, 1H), 5.21 (t,  $J$  = 6.8 Hz, 1H), 4.54 (s, 1H), 4.14 (s, 1H), 2.34 (d,  $J$  = 6.8 Hz, 2H), 1.89 (s, 2H). <sup>13</sup>C NMR (151 MHz, cdcl<sub>3</sub>)  $\delta$  193.1, 147.0, 136.9, 134.4, 128.8, 123.9, 116.4, 71.6, 68.7, 29.2, 21.4. IR (neat, cm<sup>-1</sup>): 2939, 1681, 1440, 1301, 1172, 958, 735. GCMS (EI) calcd for C<sub>11</sub>H<sub>12</sub>O<sub>2</sub>: 176.08, found: 176.09.

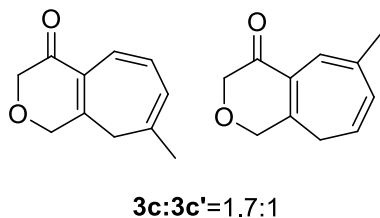

**8-methyl-3,9-dihydrocyclohepta[c]pyran-4(1H)-one 3c and 6-methyl-3,9-dihydrocyclohepta[c]pyran-4(1H)-one 3c':** The compound **3c** and **3c'** was prepared in 39% yield according to the general procedure **C** (eluents: ethyl acetate: hexanes = 1:10). **3c** (major)

$^1\text{H}$  NMR (500 MHz, Chloroform- $d$ )  $\delta$  7.12 (d,  $J = 11.3$  Hz, 1H), 6.62 (dd,  $J = 11.4, 5.8$  Hz, 1H), 6.11 (t,  $J = 8.1$  Hz, 1H), 4.49 (s, 2H), 4.16 (s, 2H), 2.33 (s, 2H), 2.02 (s, 3H). **3c'** (minor)  $^1\text{H}$  NMR (500 MHz, Chloroform- $d$ )  $\delta$  7.01 (s, 1H), 6.11 (t,  $J = 8.1$  Hz, 1H), 5.44 (dt,  $J = 9.5, 6.8$  Hz, 1H), 4.54 (s, 2H), 4.15 (s, 2H), 2.39 (d,  $J = 6.7$  Hz, 2H), 2.11 (s, 3H).  $^{13}\text{C}$  NMR (126 MHz,  $\text{CDCl}_3$ )  $\delta$  193.6, 193.4, 143.6, 142.8, 140.6, 131.9, 131.2, 130.7, 129.2, 128.9, 124.0, 122.8, 122.5, 121.7, 119.1, 71.7, 71.5, 69.2, 68.9, 35.3, 29.4, 24.7, 24.4. IR (neat,  $\text{cm}^{-1}$ ): 2966, 1683, 1437, 1346, 1120, 958, 767. MS (ESI/[ $\text{M}+\text{Na}$ ] $^+$ ) calcd for  $\text{C}_{11}\text{H}_{12}\text{NaO}_2^+$ : 199.07, found: 199.07.

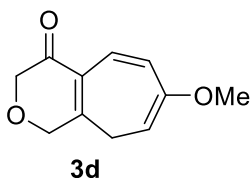

**7-methoxy-3,9-dihydrocyclohepta[c]pyran-4(1H)-one 3d:** The compound **3d** was prepared in 50 % yield according to the general procedure **C** (eluent: ethyl acetate: hexanes = 1:10).  $^1\text{H}$  NMR (600 MHz, Chloroform- $d$ )  $\delta$  6.43 (d,  $J = 7.0$  Hz, 1H), 6.35 (t,  $J = 7.7$  Hz, 1H), 5.47 (d,  $J = 6.9$  Hz, 1H), 4.58 (s, 2H), 4.18 (s, 2H), 3.61 (s, 3H), 2.62 (d,  $J = 7.8$  Hz, 2H).  $^{13}\text{C}$  NMR (151 MHz,  $\text{cdCl}_3$ )  $\delta$  197.1, 149.5, 134.1, 129.9, 125.5, 123.3, 98.0, 74.1, 70.9, 56.5, 32.8. IR (neat,  $\text{cm}^{-1}$ ): 2964, 2837, 1701, 1601, 1507, 1292, 1164, 1098, 1036, 765. MS (ESI/[ $\text{M}+\text{Na}$ ] $^+$ ) calcd for  $\text{C}_{11}\text{H}_{12}\text{NaO}_3^+$ : 215.07, found: 215.08.

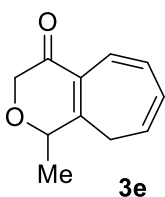

**1-methyl-3,9-dihydrocyclohepta[c]pyran-4(1H)-one 3e:** The compound **3e** was prepared in 83% yield according to the general procedure **C** (eluent: ethyl acetate: hexanes = 1:10).  $^1\text{H}$  NMR (500 MHz,  $\text{CDCl}_3$ )  $\delta$  7.27 (d,  $J = 11.3$  Hz, 1H), 6.74 (dd,  $J = 11.3, 5.5$  Hz, 1H), 6.32 (dd,  $J = 9.1, 5.5$  Hz, 1H), 5.47 (dd,  $J = 16.0, 6.9$  Hz, 1H), 4.65 (q,  $J = 6.6$  Hz, 1H), 4.30 – 4.22 (m, 1H), 4.12 (ddd,  $J = 13.0, 12.5, 8.6$  Hz, 1H), 2.78 (dd,  $J = 12.1, 7.5$  Hz, 1H), 1.93 – 1.82 (m, 1H), 1.49 (d,  $J = 6.7$  Hz, 3H).  $^{13}\text{C}$  NMR (126 MHz,  $\text{CDCl}_3$ )  $\delta$  193.5, 148.4, 131.3, 129.0, 128.4, 124.8, 119.4, 73.5, 70.1, 29.9, 21.0. IR (neat,  $\text{cm}^{-1}$ ): 2984, 1683, 1437, 1311, 1296, 1120, 743. MS (ESI/[ $\text{M}+\text{Na}$ ] $^+$ ) calcd for  $\text{C}_{11}\text{H}_{12}\text{NaO}_2^+$ : 199.07, found: 199.07.

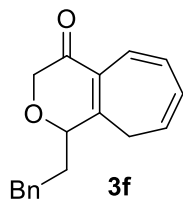

**1-phenethyl-3,9-dihydrocyclohepta[c]pyran-4(1H)-one 3f:** The compound **3f** was prepared in 82% yield according to the general procedure **C** (eluent: ethyl acetate: hexanes = 1:10).  $^1\text{H}$  NMR (500 MHz, Chloroform- $d$ )  $\delta$  7.36 – 7.32 (m, 2H), 7.29 (d,  $J$  = 11.4 Hz, 1H), 7.26 – 7.20 (m, 3H), 6.75 (dd,  $J$  = 11.3, 5.5 Hz, 1H), 6.33 (dd,  $J$  = 9.2, 5.5 Hz, 1H), 5.46 (dt,  $J$  = 9.1, 6.8 Hz, 1H), 4.49 (dd,  $J$  = 9.7, 2.7 Hz, 1H), 4.33 (d,  $J$  = 16.2 Hz, 1H), 4.14 (d,  $J$  = 16.3 Hz, 1H), 2.92 (ddd,  $J$  = 14.0, 9.6, 4.5 Hz, 1H), 2.78 (dt,  $J$  = 13.8, 8.3 Hz, 1H), 2.72 (dd,  $J$  = 12.2, 7.4 Hz, 1H), 2.27 – 2.13 (m, 1H), 2.05 – 1.87 (m, 2H).  $^{13}\text{C}$  NMR (126 MHz,  $\text{CDCl}_3$ )  $\delta$  193.4, 147.2, 141.2, 131.3, 129.5, 128.5, 128.5, 128.4, 126.1, 125.1, 119.7, 76.1, 69.5, 36.0, 31.7, 29.8. IR (neat,  $\text{cm}^{-1}$ ): 3028, 2930, 1686, 1496, 1454, 1310, 1113, 750. MS (ESI/[ $\text{M}+\text{Na}$ ] $^+$ ) calcd for  $\text{C}_{18}\text{H}_{18}\text{NaO}_2^+$ : 289.12, found:289.12.

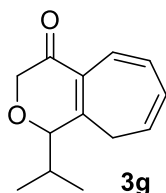

**1-isopropyl-3,9-dihydrocyclohepta[c]pyran-4(1H)-one 3g:** The compound **3g** was prepared in 77% yield according to the general procedure **C** (eluent: ethyl acetate: hexanes = 1:10).  $^1\text{H}$  NMR (500 MHz, Chloroform- $d$ )  $\delta$  7.26 (d,  $J$  = 11.3 Hz, 1H), 6.72 (dd,  $J$  = 11.4, 5.5 Hz, 1H), 6.41 – 6.25 (m, 1H), 5.44 (td,  $J$  = 8.6, 6.1 Hz, 1H), 4.40 (s, 1H), 4.26 (d,  $J$  = 16.0 Hz, 1H), 4.06 (dd,  $J$  = 16.0, 1.8 Hz, 1H), 2.91 (dd,  $J$  = 12.2, 7.7 Hz, 1H), 2.19 (pd,  $J$  = 6.8, 2.6 Hz, 1H), 1.94 – 1.84 (m, 1H), 1.15 (d,  $J$  = 6.9 Hz, 3H), 0.77 (d,  $J$  = 6.8 Hz, 3H).  $^{13}\text{C}$  NMR (126 MHz,  $\text{CDCl}_3$ )  $\delta$  193.6, 146.8, 131.2, 130.6, 128.3, 125.2, 120.7, 82.0, 70.4, 31.8, 29.7, 20.4, 15.7. IR (neat,  $\text{cm}^{-1}$ ): 2971, 1685, 1437, 1313, 1109, 953, 722. MS (ESI/[ $\text{M}+\text{Na}$ ] $^+$ ) calcd for  $\text{C}_{13}\text{H}_{16}\text{NaO}_2^+$ : 227.10, found:227.10.

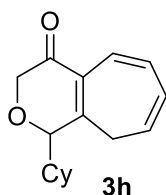

**1-cyclohexyl-3,9-dihydrocyclohepta[c]pyran-4(1H)-one 3h:** The compound **3h** was prepared in 78% yield according to the general procedure **C** (eluents: ethyl acetate: hexanes = 1:10). <sup>1</sup>H NMR (500 MHz, Chloroform-d) δ 7.26 (d, *J* = 11.4 Hz, 1H), 6.72 (dd, *J* = 11.4, 5.5 Hz, 1H), 6.33 (dd, *J* = 9.3, 5.4 Hz, 1H), 5.42 (td, *J* = 8.6, 6.3 Hz, 1H), 4.38 (s, 1H), 4.25 (d, *J* = 16.1 Hz, 1H), 4.10 – 4.00 (m, 1H), 2.90 (dd, *J* = 12.2, 7.7 Hz, 1H), 1.89 (dd, *J* = 12.3, 6.1 Hz, 1H), 1.85 – 1.74 (m, 2H), 1.71 – 1.64 (m, 3H), 1.59 – 1.44 (m, 2H), 1.32 (tdd, *J* = 12.9, 9.1, 3.7 Hz, 1H), 1.19 – 1.02 (m, 3H). <sup>13</sup>C NMR (126 MHz, CDCl<sub>3</sub>) δ 193.6, 146.7, 131.2, 130.5, 128.4, 125.4, 120.5, 82.1, 70.3, 42.1, 30.8, 29.9, 26.8, 26.3, 26.2, 26.1. IR (neat, cm<sup>-1</sup>): 2932, 2853, 1686, 1438, 1311, 1140, 716. MS (ESI/[M+Na]<sup>+</sup>) calcd for C<sub>16</sub>H<sub>20</sub>NaO<sub>2</sub><sup>+</sup>: 267.14, found:267.14.

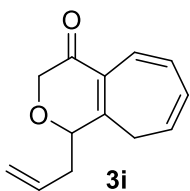

**1-allyl-3,9-dihydrocyclohepta[c]pyran-4(1H)-one 3i:** The compound **3i** was prepared in 71% yield according to the general procedure **C** (eluents: ethyl acetate: hexanes = 1:10). <sup>1</sup>H NMR (600 MHz, Chloroform-d) δ 7.26 (d, *J* = 11.3 Hz, 1H), 6.74 (dd, *J* = 11.4, 5.5 Hz, 1H), 6.32 (dd, *J* = 9.3, 5.5 Hz, 1H), 5.89 (ddt, *J* = 17.0, 10.2, 6.8 Hz, 1H), 5.47 (dt, *J* = 9.1, 6.9 Hz, 1H), 5.23 – 5.09 (m, 2H), 4.59 (dd, *J* = 8.8, 3.6 Hz, 1H), 4.29 (d, *J* = 16.4 Hz, 1H), 4.11 (d, *J* = 16.4 Hz, 1H), 2.75 (dd, *J* = 12.3, 7.3 Hz, 1H), 2.70 – 2.62 (m, 1H), 2.47 (dt, *J* = 15.1, 7.7 Hz, 1H), 2.00 (dd, *J* = 12.3, 6.3 Hz, 1H). <sup>13</sup>C NMR (151 MHz, cdcl<sub>3</sub>) δ 193.3, 146.6, 133.7, 131.5, 129.6, 128.4, 125.0, 119.8, 117.8, 76.8, 69.6, 38.6, 29.9. IR (neat, cm<sup>-1</sup>):2977, 1684, 1436, 1310, 1119, 995, 919, 754. MS (ESI/[M+Na]<sup>+</sup>) calcd for C<sub>13</sub>H<sub>14</sub>NaO<sub>2</sub><sup>+</sup>: 225.09, found:225.09.

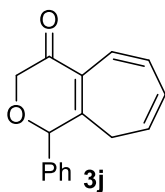

**1-phenyl-3,9-dihydrocyclohepta[c]pyran-4(1H)-one 3j:** The compound **3j** was prepared in 84% yield according to the general procedure **C** (eluents: ethyl acetate: hexanes = 1:10). <sup>1</sup>H

NMR (600 MHz, Chloroform-d)  $\delta$  7.42 – 7.35 (m, 5H), 7.30 (d,  $J$  = 11.5 Hz, 1H), 6.74 (dd,  $J$  = 11.4, 5.5 Hz, 1H), 6.24 (dd,  $J$  = 9.3, 5.5 Hz, 1H), 5.52 (s, 1H), 4.97 (dt,  $J$  = 9.3, 6.8 Hz, 1H), 4.25 (d,  $J$  = 16.4 Hz, 1H), 4.18 (d,  $J$  = 16.5 Hz, 1H), 2.49 (dd,  $J$  = 12.2, 7.2 Hz, 1H), 2.09 (dd,  $J$  = 12.2, 6.3 Hz, 1H).  $^{13}\text{C}$  NMR (151 MHz,  $\text{cdCl}_3$ )  $\delta$  193.4, 147.1, 138.5, 131.6, 130.1, 129.1, 128.9, 128.6, 128.1, 124.4, 121.8, 80.7, 69.6, 30.4. IR (neat,  $\text{cm}^{-1}$ ): 3029, 1686, 1439, 1340, 1111, 995, 748, 720. MS (ESI/[M+Na] $^+$ ) calcd for  $\text{C}_{16}\text{H}_{14}\text{NaO}_2^+$ : 261.09, found: 261.09.

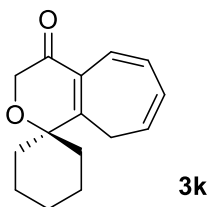

**3H-spiro[cyclohepta[c]pyran-1,1'-cyclohexan]-4(9H)-one 3k:** The compound **3k** was prepared in 80% yield according to the general procedure **C** (eluents: ethyl acetate: hexanes = 1:10).  $^1\text{H}$  NMR (500 MHz, Chloroform-d)  $\delta$  7.29 (d,  $J$  = 11.4 Hz, 1H), 6.72 (dd,  $J$  = 11.3, 5.4 Hz, 1H), 6.30 (dd,  $J$  = 9.1, 5.4 Hz, 1H), 5.49 – 5.30 (m, 1H), 4.20 (s, 2H), 2.31 (d,  $J$  = 6.9 Hz, 2H), 1.89 (d,  $J$  = 11.5 Hz, 2H), 1.79 – 1.60 (m, 7H), 1.35 – 1.21 (m, 1H).  $^{13}\text{C}$  NMR (126 MHz,  $\text{CDCl}_3$ )  $\delta$  194.3, 152.1, 131.0, 128.3, 128.1, 125.2, 119.8, 76.3, 65.6, 32.5, 30.1, 25.0, 21.1. IR (neat,  $\text{cm}^{-1}$ ): 2933, 1682, 1439, 1310, 1108, 937, 753. MS (ESI/[M+Na] $^+$ ) calcd for  $\text{C}_{15}\text{H}_{18}\text{NaO}_2^+$ : 253.12, found: 253.13.

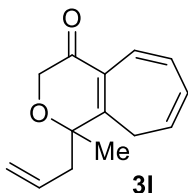

**1-allyl-1-methyl-3,9-dihydrocyclohepta[c]pyran-4(1H)-one 3l:** The compound **3l** was prepared in 65% yield according to the general procedure **C** (eluents: ethyl acetate: hexanes = 1:10).  $^1\text{H}$  NMR (500 MHz, Chloroform-d)  $\delta$  7.27 (d,  $J$  = 11.4 Hz, 1H), 6.72 (dd,  $J$  = 11.4, 5.4 Hz, 1H), 6.30 (dd,  $J$  = 9.2, 5.4 Hz, 1H), 5.91 – 5.77 (m, 1H), 5.46 (dt,  $J$  = 9.1, 6.9 Hz, 1H), 5.22 – 5.14 (m, 1H), 5.14 (s, 1H), 4.36 – 4.13 (m, 2H), 2.70 (dd,  $J$  = 14.7, 6.2 Hz, 1H), 2.51 (dd,  $J$  = 14.6, 7.9 Hz, 1H), 2.43 (dd,  $J$  = 12.2, 7.0 Hz, 1H), 2.30 (dd,  $J$  = 12.3, 6.9 Hz, 1H), 1.48 (s, 3H).  $^{13}\text{C}$  NMR (126 MHz,  $\text{CDCl}_3$ )  $\delta$  193.7, 152.0, 132.6, 131.3, 128.6, 128.2, 125.2, 120.7, 118.6, 77.3, 66.4, 42.2, 30.4, 23.7. IR (neat,  $\text{cm}^{-1}$ ): 2980, 1686, 1437, 1310, 1109, 920, 756. MS (ESI/[M+Na] $^+$ ) calcd for  $\text{C}_{14}\text{H}_{16}\text{NaO}_2^+$ : 239.10, found: 239.11.

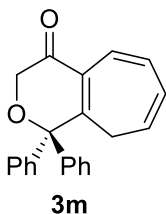

**1,1-diphenyl-3,9-dihydrocyclohepta[c]pyran-4(1H)-one 3m:** The compound **3m** was prepared in 70% yield according to the general procedure **C** (eluent: ethyl acetate: hexanes = 1:10). The color of the compound **3n** and 2,6-dichloropyridine is the same, and can't be separated. For detail, see the HNMR.  $^1\text{H}$  NMR (500 MHz, Chloroform- $d$ )  $\delta$  7.34 (ddd,  $J = 16.6, 7.1, 3.5$  Hz, 1H), 6.72 (dd,  $J = 11.4, 5.4$  Hz, 1H), 6.08 (dd,  $J = 9.2, 5.4$  Hz, 1H), 4.30 (dt,  $J = 9.2, 6.9$  Hz, 1H), 4.02 (s, 2H), 2.46 (d,  $J = 6.8$  Hz, 2H).  $^{13}\text{C}$  NMR (126 MHz,  $\text{CDCl}_3$ )  $\delta$  193.9, 151.2, 150.6, 140.7, 131.6, 130.0, 129.2, 128.5, 128.1, 127.9, 127.3, 124.2, 122.8, 122.8, 85.9, 67.0, 32.8. IR (neat,  $\text{cm}^{-1}$ ): 3045, 1687, 1565, 1438, 1339, 1162, 989, 760. MS (ESI/[ $\text{M}+\text{Na}$ ] $^+$ ) calcd for  $\text{C}_{22}\text{H}_{18}\text{NaO}_2^+$ : 337.12, found: 337.13.

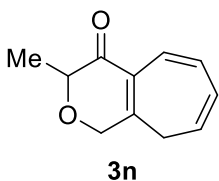

**3-methyl-3,9-dihydrocyclohepta[c]pyran-4(1H)-one 3n:** The compound **3n** was prepared in 40% yield according to the general procedure **C** (eluent: ethyl acetate: hexanes = 1:10).  $^1\text{H}$  NMR (600 MHz, Chloroform- $d$ )  $\delta$  7.22 (d,  $J = 11.4$  Hz, 1H), 6.68 (dd,  $J = 11.4, 5.5$  Hz, 1H), 6.28 (dd,  $J = 9.3, 5.5$  Hz, 1H), 5.46 (dt,  $J = 8.8, 6.5$  Hz, 1H), 4.65 (d,  $J = 18.7$  Hz, 1H), 4.48 (d,  $J = 18.7$  Hz, 1H), 4.09 (q,  $J = 6.7$  Hz, 1H), 2.71 (dd,  $J = 12.4, 7.5$  Hz, 1H), 2.11 (dd,  $J = 12.5, 5.9$  Hz, 1H), 1.41 (d,  $J = 6.7$  Hz, 3H).  $^{13}\text{C}$  NMR (151 MHz,  $\text{cdcl}_3$ )  $\delta$  195.3, 144.7, 131.0, 128.6, 128.6, 125.5, 119.9, 76.5, 67.9, 29.4, 15.6. IR (neat,  $\text{cm}^{-1}$ ): 3030, 2939, 1682, 1436, 1371, 1265, 1130, 1116, 1036, 734. MS (ESI/[ $\text{M}+\text{Na}$ ] $^+$ ) calcd for  $\text{C}_{11}\text{H}_{12}\text{NaO}_2^+$ : 199.07, found: 199.08.

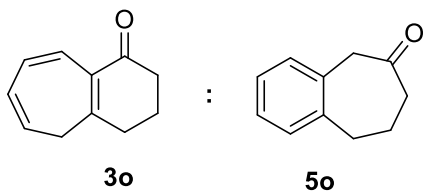



**2,3,4,5-tetrahydro-1H-benzo[7]annulen-1-one 3o** and **8,9-dihydro-5H-benzo[7]annulen-6(7H)-one 5o**. The ratio of **3o** to **5o** is 3.3:1 from the crude NMR. The compound **3o** and **5o** was prepared in 59% yield according to the general procedure C at 60°C for 4h, without adding 3 equivs Et<sub>3</sub>N (eluent: ethyl acetate: hexanes = 1:10). **3o (major)** <sup>1</sup>H NMR (400 MHz, Chloroform-d) δ 7.24 (d, *J* = 11.5 Hz, 1H), 6.61 (dd, *J* = 11.5, 5.3 Hz, 1H), 6.21 (dd, *J* = 9.2, 5.3 Hz, 1H), 5.49 (dt, *J* = 9.3, 6.8 Hz, 1H), 2.65 (t, *J* = 6.0 Hz, 2H), 2.45 (dd, *J* = 14.8, 7.0 Hz, 4H), 1.96 (dt, *J* = 12.7, 6.3 Hz, 2H). <sup>13</sup>C NMR (101 MHz, Chloroform-d) δ 198.0, 149.4, 131.5, 130.0, 128.0, 127.4, 120.6, 37.7, 34.9, 32.6, 22.2. **5o(minor)**: <sup>1</sup>H NMR (400 MHz, Chloroform-d) δ 7.17 (dtd, *J* = 13.3, 6.3, 2.6 Hz, 4H), 3.73 (s, 2H), 3.05 – 2.88 (m, 2H), 2.57 (t, *J* = 6.9 Hz, 2H), 2.03 – 1.97 (m, 2H). <sup>13</sup>C NMR (101 MHz, Chloroform-d) δ 208.8, 140.4, 133.5, 129.5, 129.2, 127.5, 127.1, 126.7, 50.1, 43.7, 33.0, 26.2. IR (neat, cm<sup>-1</sup>): 2951, 1708, 1671, 1434, 1345, 1324, 1277, 1126, 754. GCMS (EI) calcd for C<sub>11</sub>H<sub>12</sub>O: 160.1, found: 160.0.

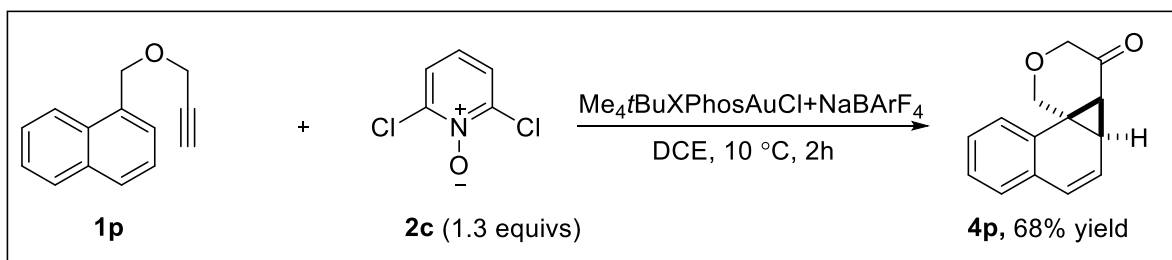

**General procedure D for gold-catalyzed oxidative cyclopropanation of 1p:** To a 3 dram vial containing 6 mL of DCE were added sequentially a 1-((prop-2-ynoxy)methyl)naphthalene 1q (0.2 mmol), 2,6-dichloropyridine N-oxide (42.4 mg, 0.26 mmol), Me<sub>4</sub><sup>t</sup>BuXPhosAuCl (7.1 mg, 0.010 mmol) and NaBARF<sub>4</sub> (13.0mg, 0.015 mmol). The resulting mixture was stirred 10 °C and the reaction was monitored by TLC. Upon completion (2h), the reaction mixture was concentrated under vacuum. The residue was purified by chromatography on silica gel (eluent: hexanes/ethyl acetate) to afford the desired product **4p** in 68% isolated yield. <sup>1</sup>H NMR (500 MHz, Chloroform-d) δ 7.48 – 7.37 (m, 1H), 7.33 – 7.24 (m, 2H), 7.24 – 7.18 (m, 1H), 6.47 (d, *J* = 9.5 Hz, 1H), 6.34 (dd, *J* = 9.5, 5.2 Hz, 1H), 4.49 (d, *J* = 11.3 Hz, 1H), 4.28 (d, *J* = 18.4 Hz, 1H), 4.24 (d, *J* = 11.3 Hz, 1H), 3.96 (d, *J* = 18.3 Hz, 1H), 3.49 – 3.36 (m, 1H), 1.27 (d, *J* = 3.8 Hz, 1H). <sup>13</sup>C NMR (126 MHz, CDCl<sub>3</sub>) δ 205.6, 131.6, 131.0, 128.7, 128.0, 127.3, 126.9, 125.6,

124.53, 72.8, 64.6, 35.6, 33.9, 28.6. IR (neat,  $\text{cm}^{-1}$ ): 2861, 1688, 1287, 1256, 1111, 913, 758. MS (ESI/[M+Na]<sup>+</sup>) calcd for  $\text{C}_{14}\text{H}_{12}\text{NaO}_2^+$ : 235.07, found:235.08.

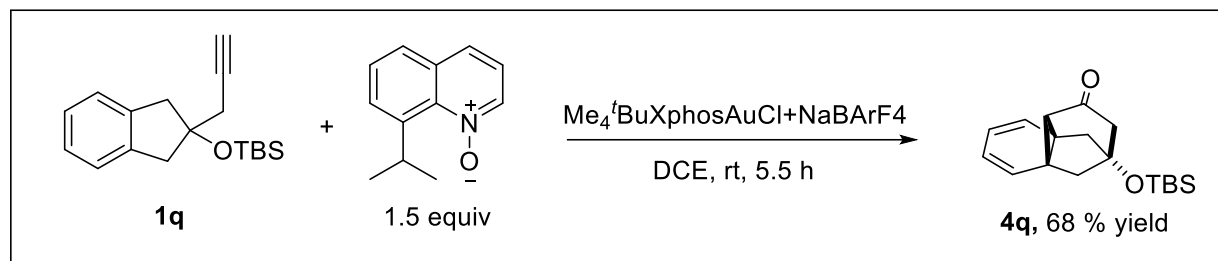

**General procedure E for gold-catalyzed oxidative cyclopropanation of 1q:** To a 3 dram vial containing 4 mL of DCE were added sequentially a tert-butyl dimethyl(2-(prop-2-ynyl)-2,3-dihydro-1H-inden-2-yloxy)silane **1q** (0.2 mmol), 8-isopropylquinoline N-oxide (56.1 mg, 0.3 mmol),  $\text{Me}_4^t\text{BuXPhosAuCl}$  (7.1 mg, 0.010 mmol) and  $\text{NaBARF}_4$  (13.0 mg, 0.015 mmol). The resulting mixture was stirred at room temperature and the reaction was monitored by TLC. Upon completion, the reaction mixture was concentrated under vacuum. The residue was purified by chromatography on silica gel (eluent: hexanes/ethyl acetate) to afford the desired product **4q**. <sup>1</sup>H NMR (500 MHz, Chloroform-*d*)  $\delta$  6.16 (dd,  $J = 7.2, 2.8$  Hz, 2H), 6.04 – 5.94 (m, 2H), 2.38 (s, 2H), 2.12 (s, 4H), 0.89 (s, 1H), 0.84 (d,  $J = 2.7$  Hz, 9H), 0.08 (s, 6H). <sup>13</sup>C NMR (126 MHz,  $\text{CDCl}_3$ )  $\delta$  210.9, 126.8, 122.9, 72.2, 52.2, 43.1, 41.2, 38.1, 25.6, 17.8, -2.4. IR (neat,  $\text{cm}^{-1}$ ): 2954, 2931, 2858, 1693, 1468, 1315, 1258, 1188, 1123, 983, 918, 838, 773. MS (ESI/[M+Na]<sup>+</sup>) calcd for  $\text{C}_{18}\text{H}_{26}\text{NaO}_2\text{Si}^+$ : 325.16, found:325.16.

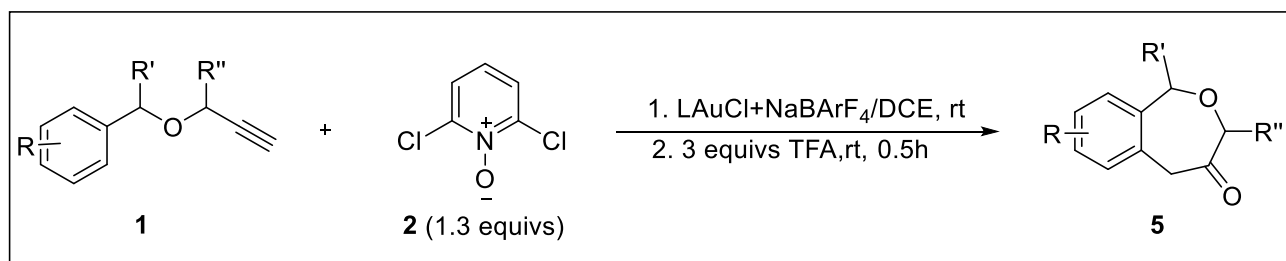

**General procedure F for gold-catalyzed oxidative cyclopropanation and ring expansion:** To a 3 dram vial containing 6 mL of DCE were added sequentially a ((prop-2-ynyl)oxy)methyl benzene derivatives **1** (0.2 mmol), 2,6-dichloropyridine N-oxide (42.4 mg, 0.26 mmol),  $\text{Me}_4^t\text{BuXPhosAuCl}$  (7.1 mg, 0.010 mmol) and  $\text{NaBARF}_4$  (13.0 mg, 0.015 mmol). The resulting

mixture was stirred at room temperature and the reaction was monitored by TLC. Upon completion, the reaction mixture was added 3 equivs TFA and stirred for 0.5 h at room temperature. The reaction mixture was concentrated under vacuum. The residue was purified by chromatography on silica gel (eluent: hexanes/ethyl acetate) to afford the desired product **5a**.

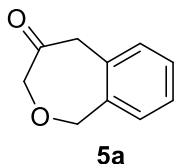

**3,5-dihydrobenzo[c]oxepin-4(1H)-one 5a:** The compound **5a** was prepared in 65% yield according to the general procedure **F** (eluent: ethyl acetate: hexanes = 1:10).  $^1\text{H}$  NMR (500 MHz, Chloroform- $d$ )  $\delta$  7.26 – 7.18 (m, 2H), 7.13 – 7.09 (m, 1H), 7.03 (d,  $J$  = 7.2 Hz, 1H), 5.11 (s, 2H), 4.19 (s, 2H), 4.08 (s, 2H).  $^{13}\text{C}$  NMR (126 MHz,  $\text{CDCl}_3$ )  $\delta$  209.1, 135.7, 130.9, 129.2, 127.7, 127.4, 125.9, 76.1, 74.9, 48.5. IR (neat,  $\text{cm}^{-1}$ ): 2893, 1725, 1475, 1263, 1116, 955, 752. MS (ESI/[ $\text{M}+\text{Na}$ ] $^+$ ) calcd for  $\text{C}_{10}\text{H}_{10}\text{NaO}_2^+$ : 185.06, found: 185.05.

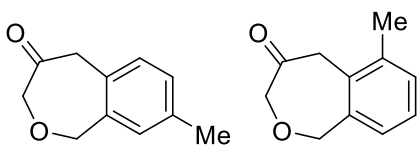

The compound **5c and 5c'** was prepared in 73% yield according to the general procedure **F** (eluent: ethyl acetate: hexanes = 1:10). **5c (major)**  $^1\text{H}$  NMR (500 MHz, Chloroform- $d$ )  $\delta$  7.04 – 6.97 (m, 2H), 6.84 (s, 1H), 5.07 (s, 2H), 4.17 (s, 2H), 4.03 (s, 2H), 2.30 (s, 3H). **5c' (minor)**  $^1\text{H}$  NMR (500 MHz, Chloroform- $d$ )  $\delta$  7.11 (d,  $J$  = 5.0 Hz, 2H), 6.89 (t,  $J$  = 4.6 Hz, 1H), 5.10 (s, 2H), 4.17 (s, 2H), 4.12 (s, 2H), 2.38 (s, 3H).  $^{13}\text{C}$  NMR (126 MHz,  $\text{CDCl}_3$ )  $\delta$  209.2, 137.1, 135.5, 130.8, 129.7, 128.4, 126.9, 126.4, 126.2, 124.3, 76.0, 75.5, 74.8, 74.8, 48.0, 42.5, 20.9, 20.8. IR (neat,  $\text{cm}^{-1}$ ): 2923, 1726, 1614, 1504, 1417, 1263, 1121, 819. MS (ESI/[ $\text{M}+\text{Na}$ ] $^+$ ) calcd for  $\text{C}_{11}\text{H}_{12}\text{KO}_2^+$ : 215.05, found: 215.06.

## Reference:

1. Shore, G.; Organ, M. G., *Chem. Eur. J.*, **2008**, *14*, 9641 – 9646.
2. Alonso, F.; Barba, I.; Yus, M., *Tetrahedron*, **1990**, *46*, 2069 – 2080.
3. Montevecchi, P.C.; Navacchia, M. L. *J. Org. Chem.*, **1998**, *63*, 537 – 542.
4. Donner, C. D.; *Org. Lett.*, **2013**, *15*, 1258 – 1261.
5. Wardrop, D. J.; Fritz, J.; *Org. Lett.*, **2006**, *8*, 3659 – 3662.
6. Bergman, Y. E.; Mulder, R.; Perlmutter, P.; *J. Org. Chem.*, **2009**, *74*, 2589 – 2591.
7. Louvel, J.; Carvalho, J. F.S.; Yu, Z.; Soethoudt, M.; Lenselink, E. B.; Klaasse, E.; Brussee, J.; Ijzerman, A. P. *J. Med. Chem.*, **2013**, *56*, 9427 – 9440.
8. Dahlbom et al. *Acta Pharmaceutica Suecica*, **1966**, *3*, 187- 195
9. Ais, V. D.; Hall, M. J.; Corsi, C.; Wendeborn, S. V.; Meyer, C.; Cossy, J. *Org. Lett.*, **2009**, *11*, 935 – 938.
10. Shade, R. E.; Hyde, A. M.; Olsen, J.-C.; Merlic, C. A. *J. Am. Chem. Soc.* **2010**, *132*, 1202 - 1203
11. Fan, X.; Li, Na; Shen, T.; Cui, X.-M.; Lv, H.; Zhu, H.-B.; Guan, Y.-H. *Tetrahedron*, **2014**, *70*, 256 – 261.

Parameter Value  
Title jkg-Vi-21B-H  
Solvent CDCl3  
Spectrometer Frequency 499.86  
Nucleus 1H

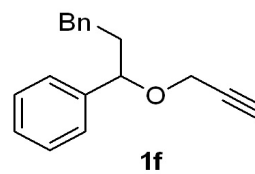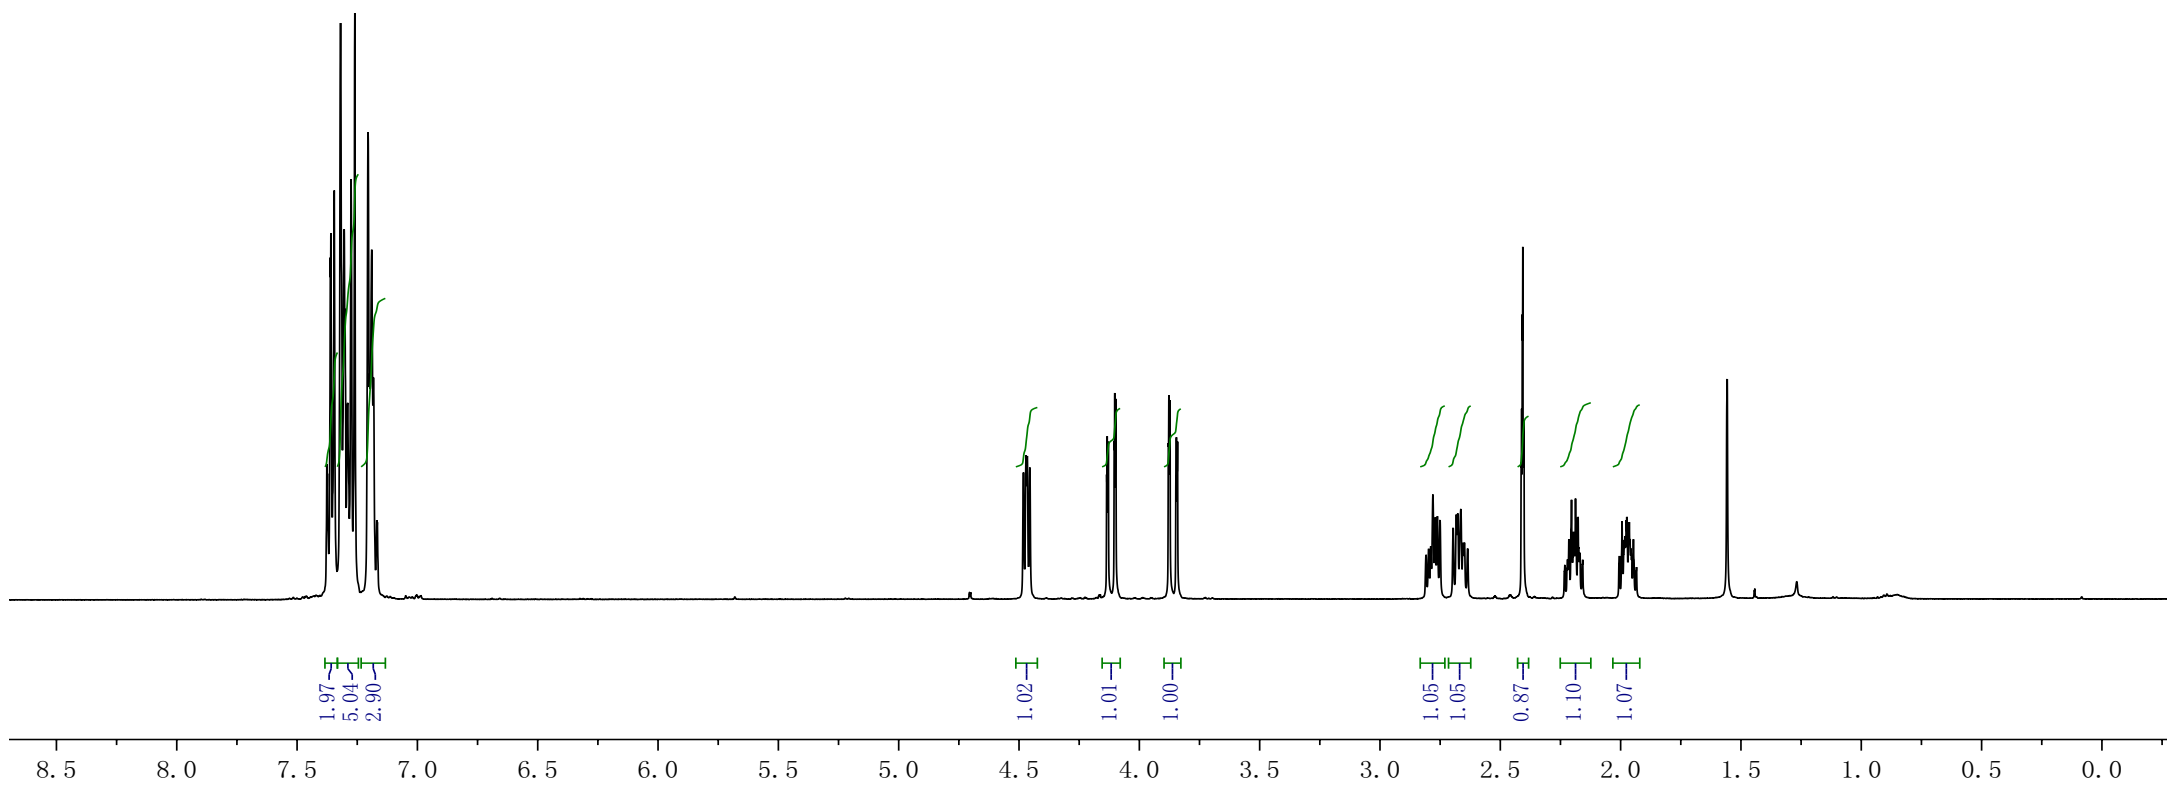

Parameter Value  
Title jkg-VI-21B-C  
Solvent CDCl3  
Spectrometer Frequency 125.70  
Nucleus 13C

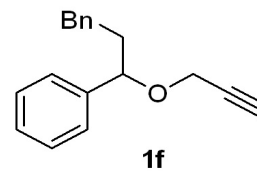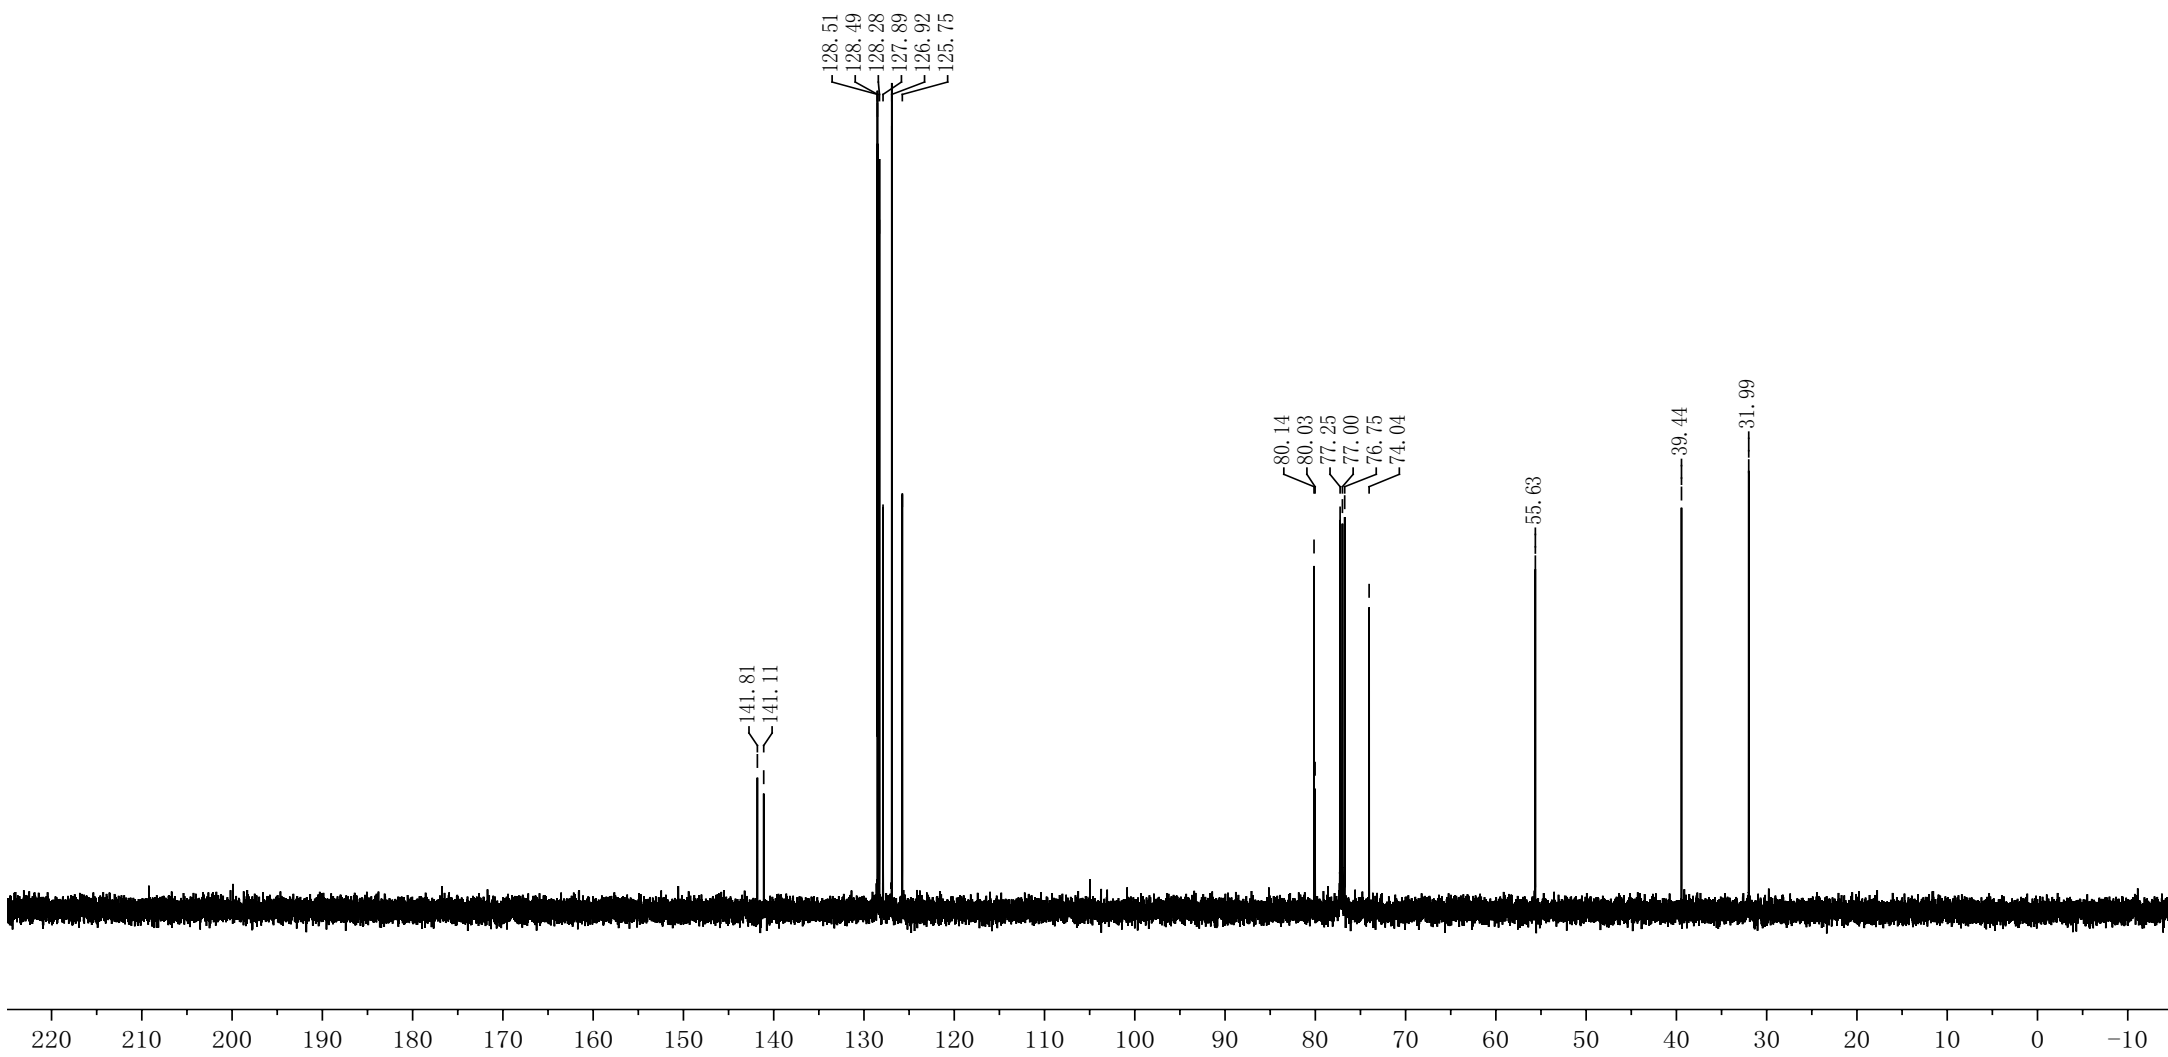

| Parameter              | Value        |
|------------------------|--------------|
| Title                  | jkg-V-161C-H |
| Solvent                | CDCl3        |
| Spectrometer Frequency | 499.86       |
| Nucleus                | 1H           |

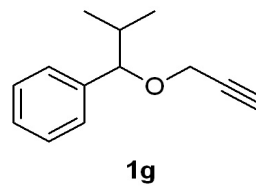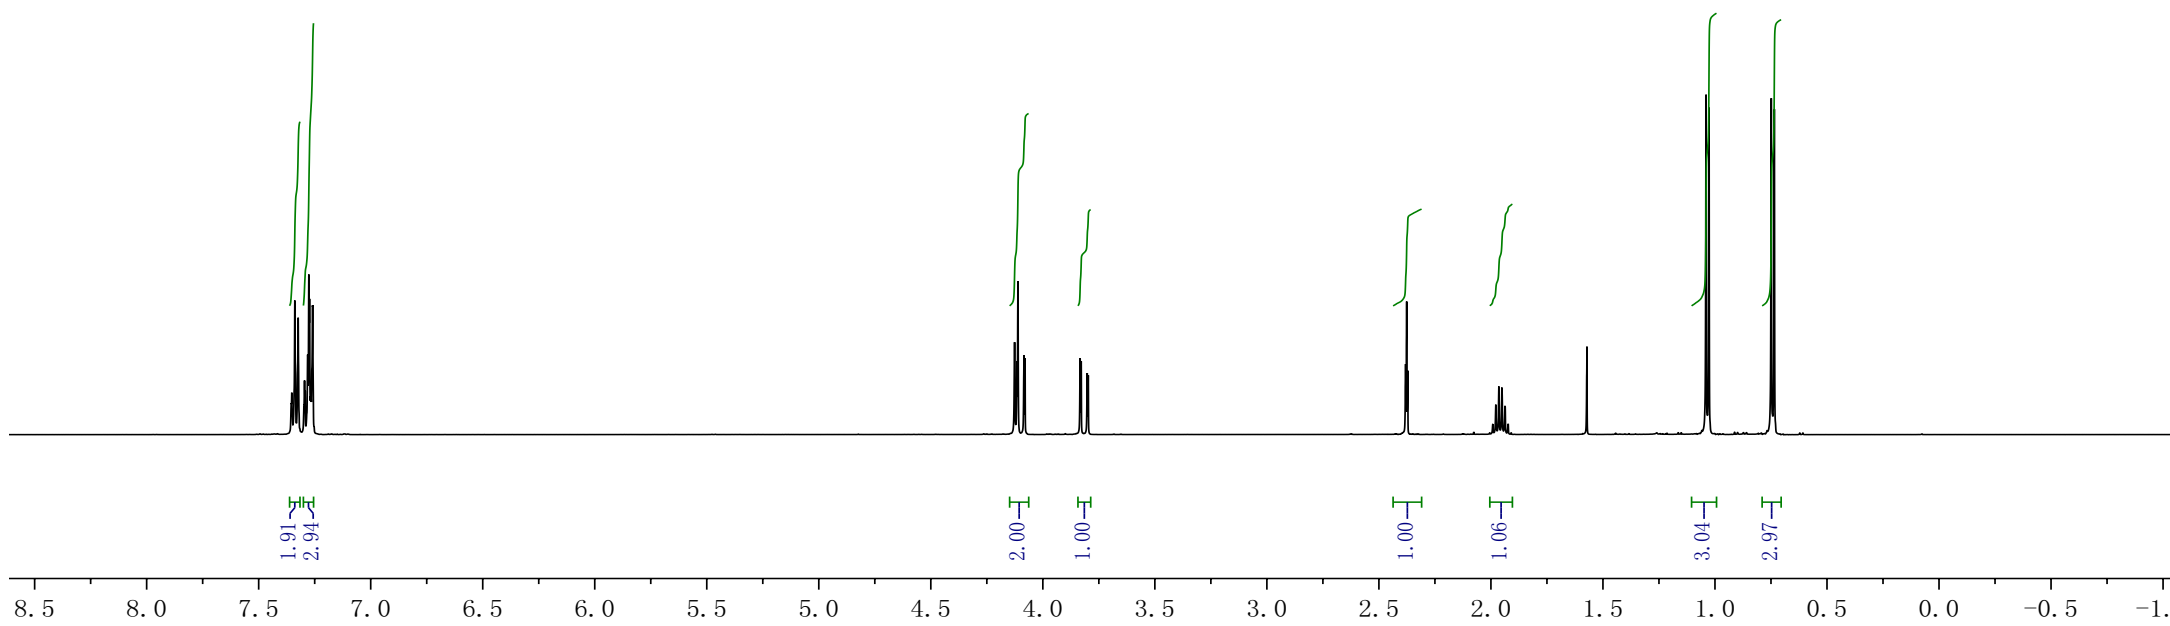

| Parameter              | Value             |
|------------------------|-------------------|
| Title                  | jkg-V-161C-C      |
| Solvent                | CDCl <sub>3</sub> |
| Spectrometer Frequency | 125.70            |
| Nucleus                | <sup>13</sup> C   |

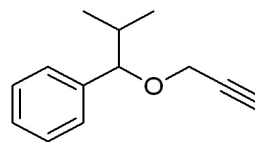

**1g**

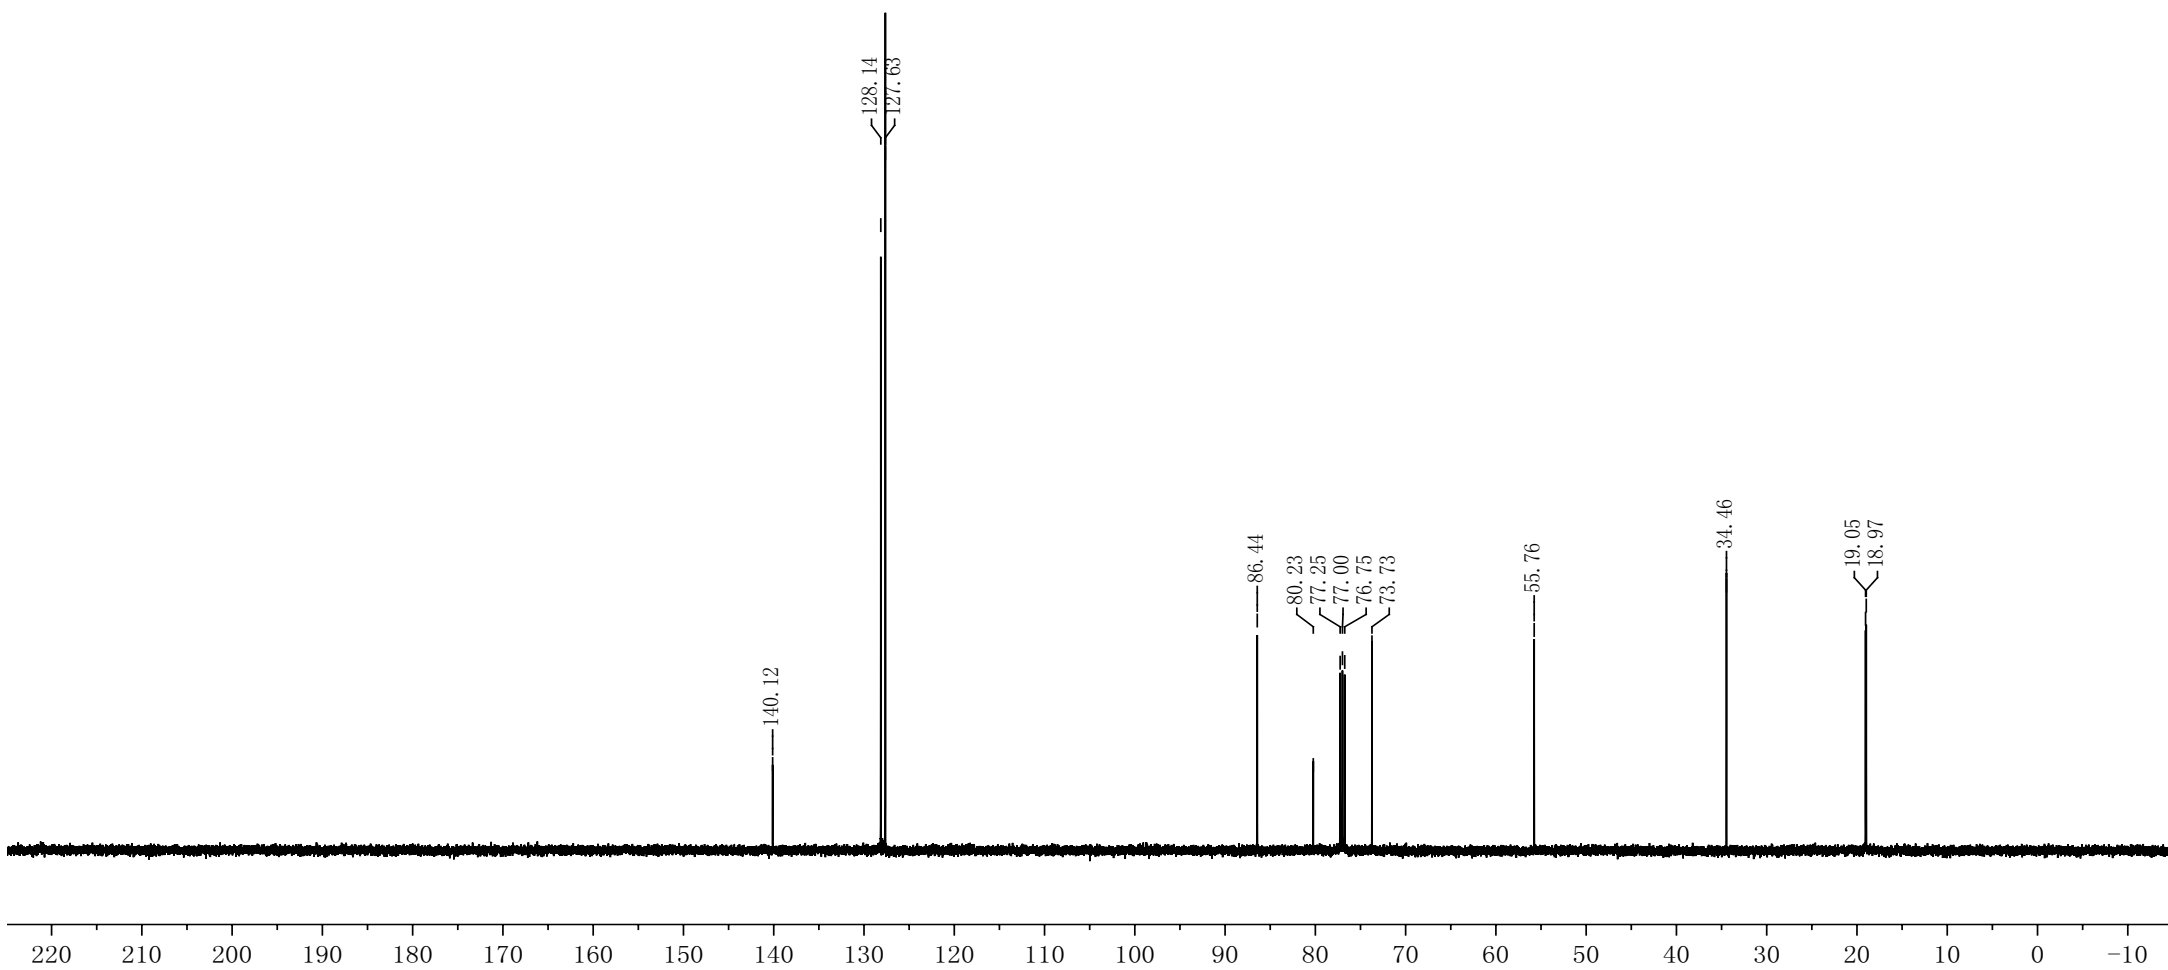



| Parameter                | Value        |
|--------------------------|--------------|
| 1 Title                  | jkg-VI-21A-H |
| 2 Solvent                | cdcl3        |
| 3 Temperature            | 25.0         |
| 4 Relaxation Delay       | 10.0000      |
| 5 Spectrometer Frequency | 599.64       |

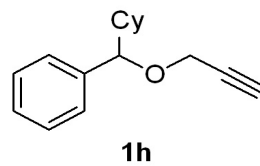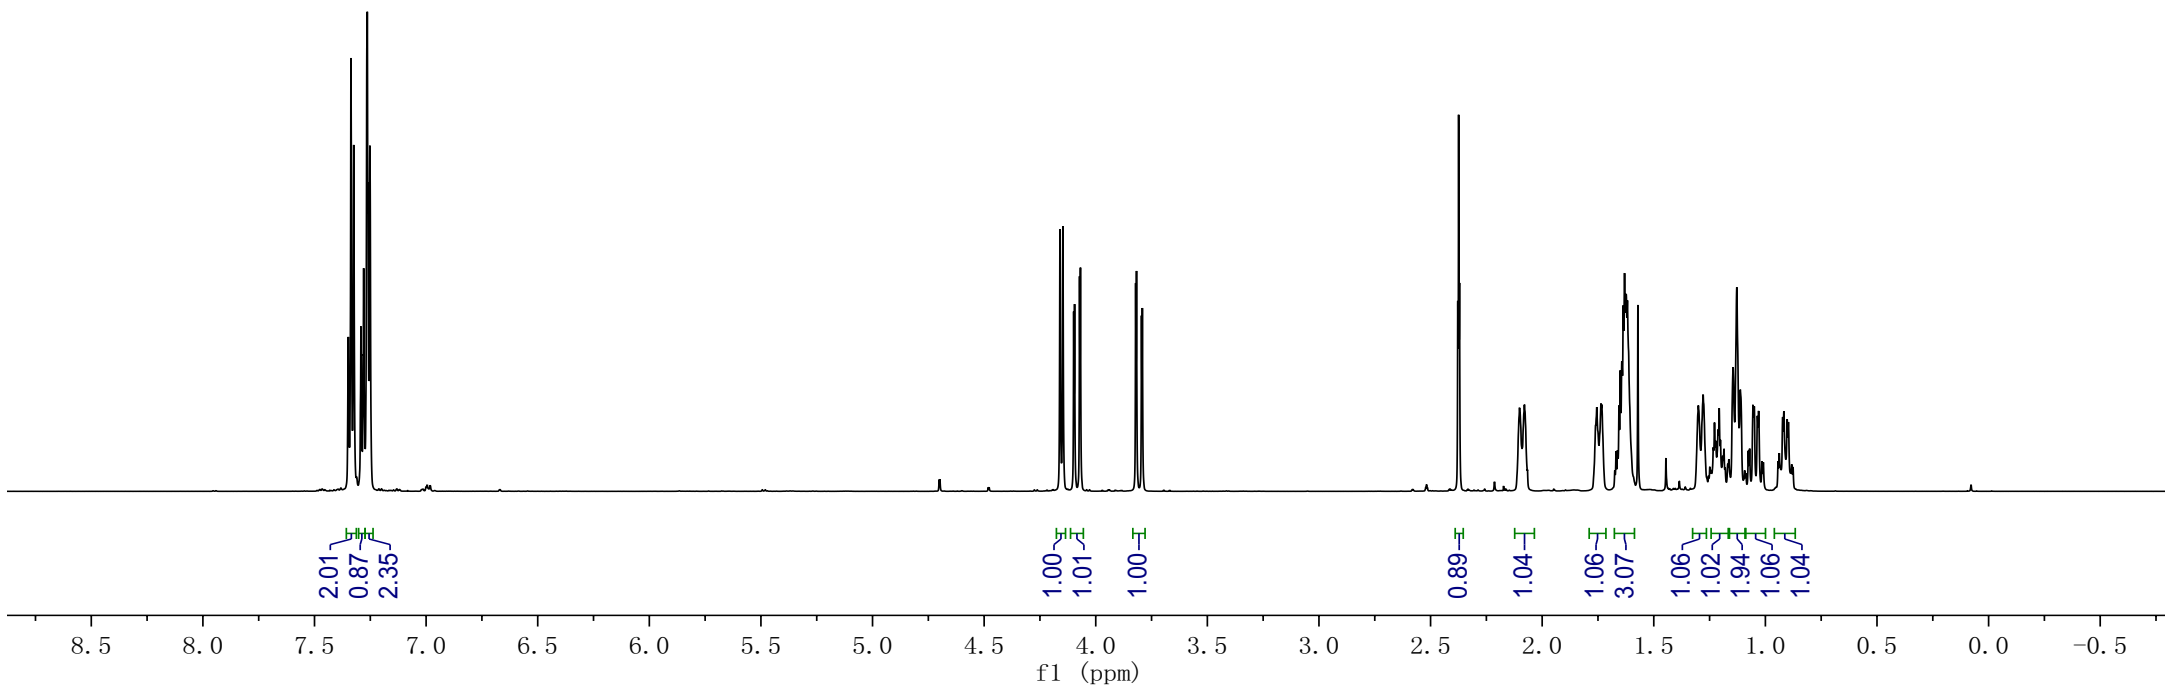

| Parameter                | Value        |
|--------------------------|--------------|
| 1 Title                  | jkg-VI-21A-C |
| 2 Solvent                | cdcl3        |
| 3 Temperature            | 25.0         |
| 4 Relaxation Delay       | 1.0000       |
| 5 Spectrometer Frequency | 150.79       |

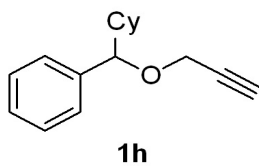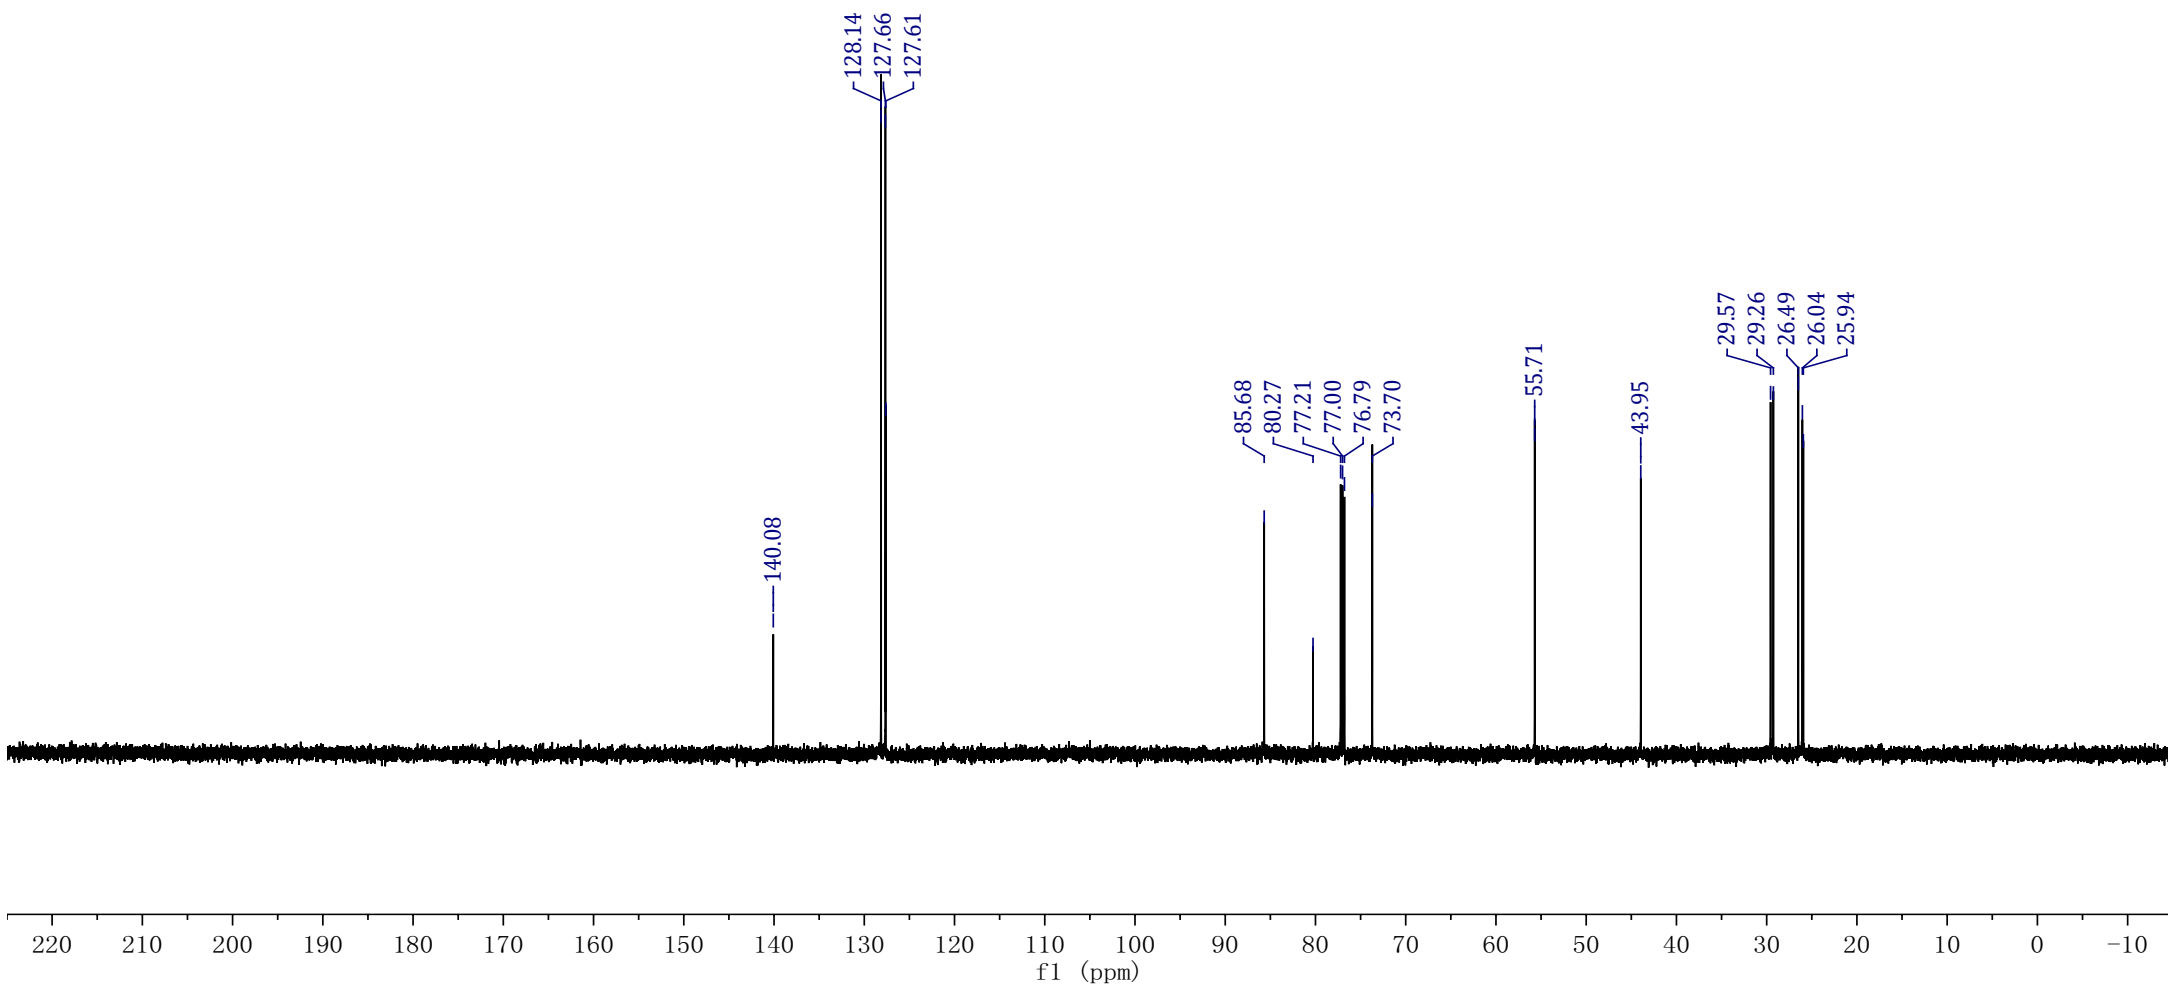

| Parameter              | Value        |
|------------------------|--------------|
| Title                  | jkg-V-154A-H |
| Solvent                | CDCl3        |
| Spectrometer Frequency | 499.86       |
| Nucleus                | 1H           |

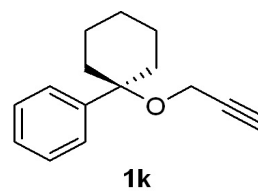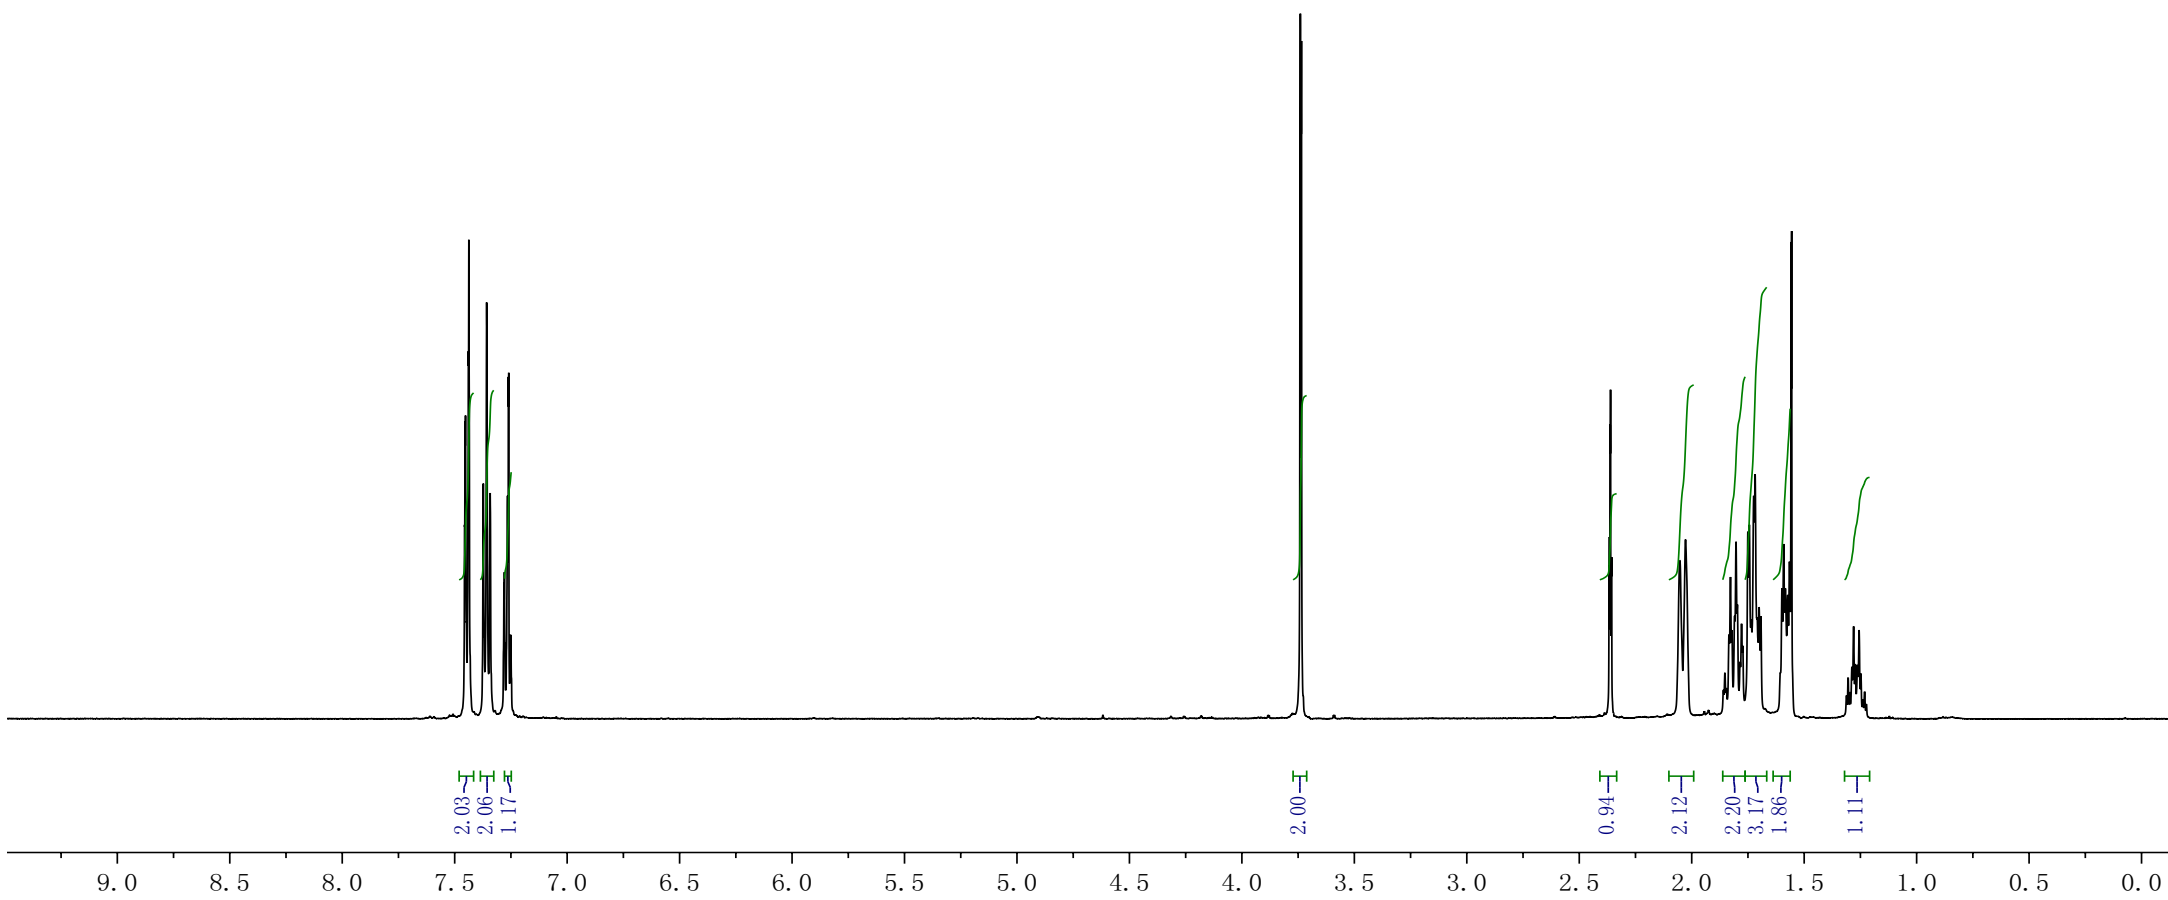

Parameter Value  
Title jkg-V-154A-C  
Solvent CDCl3  
Spectrometer Frequency 125.70  
Nucleus 13C

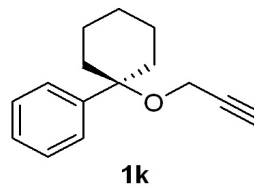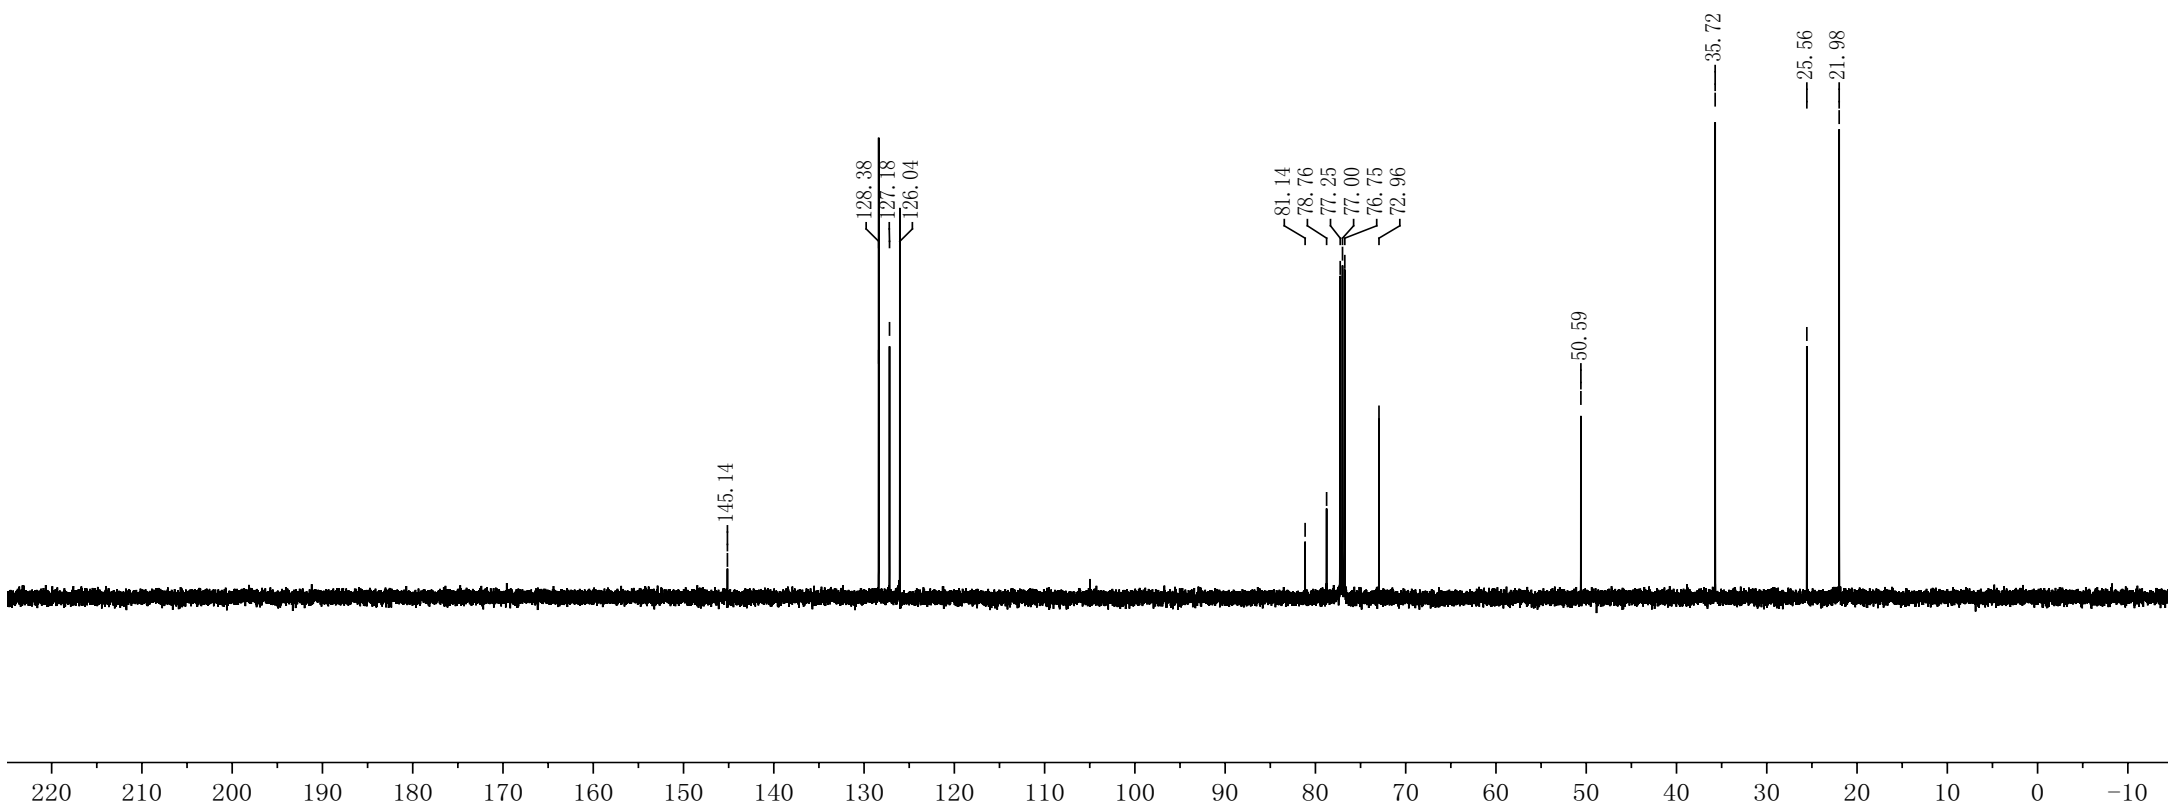

Parameter Value  
Title jkg-V-172B-H  
Solvent cdcl3  
Spectrometer Frequency 599.64  
Nucleus 1H

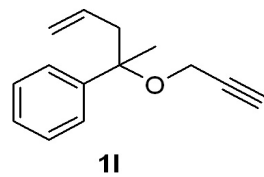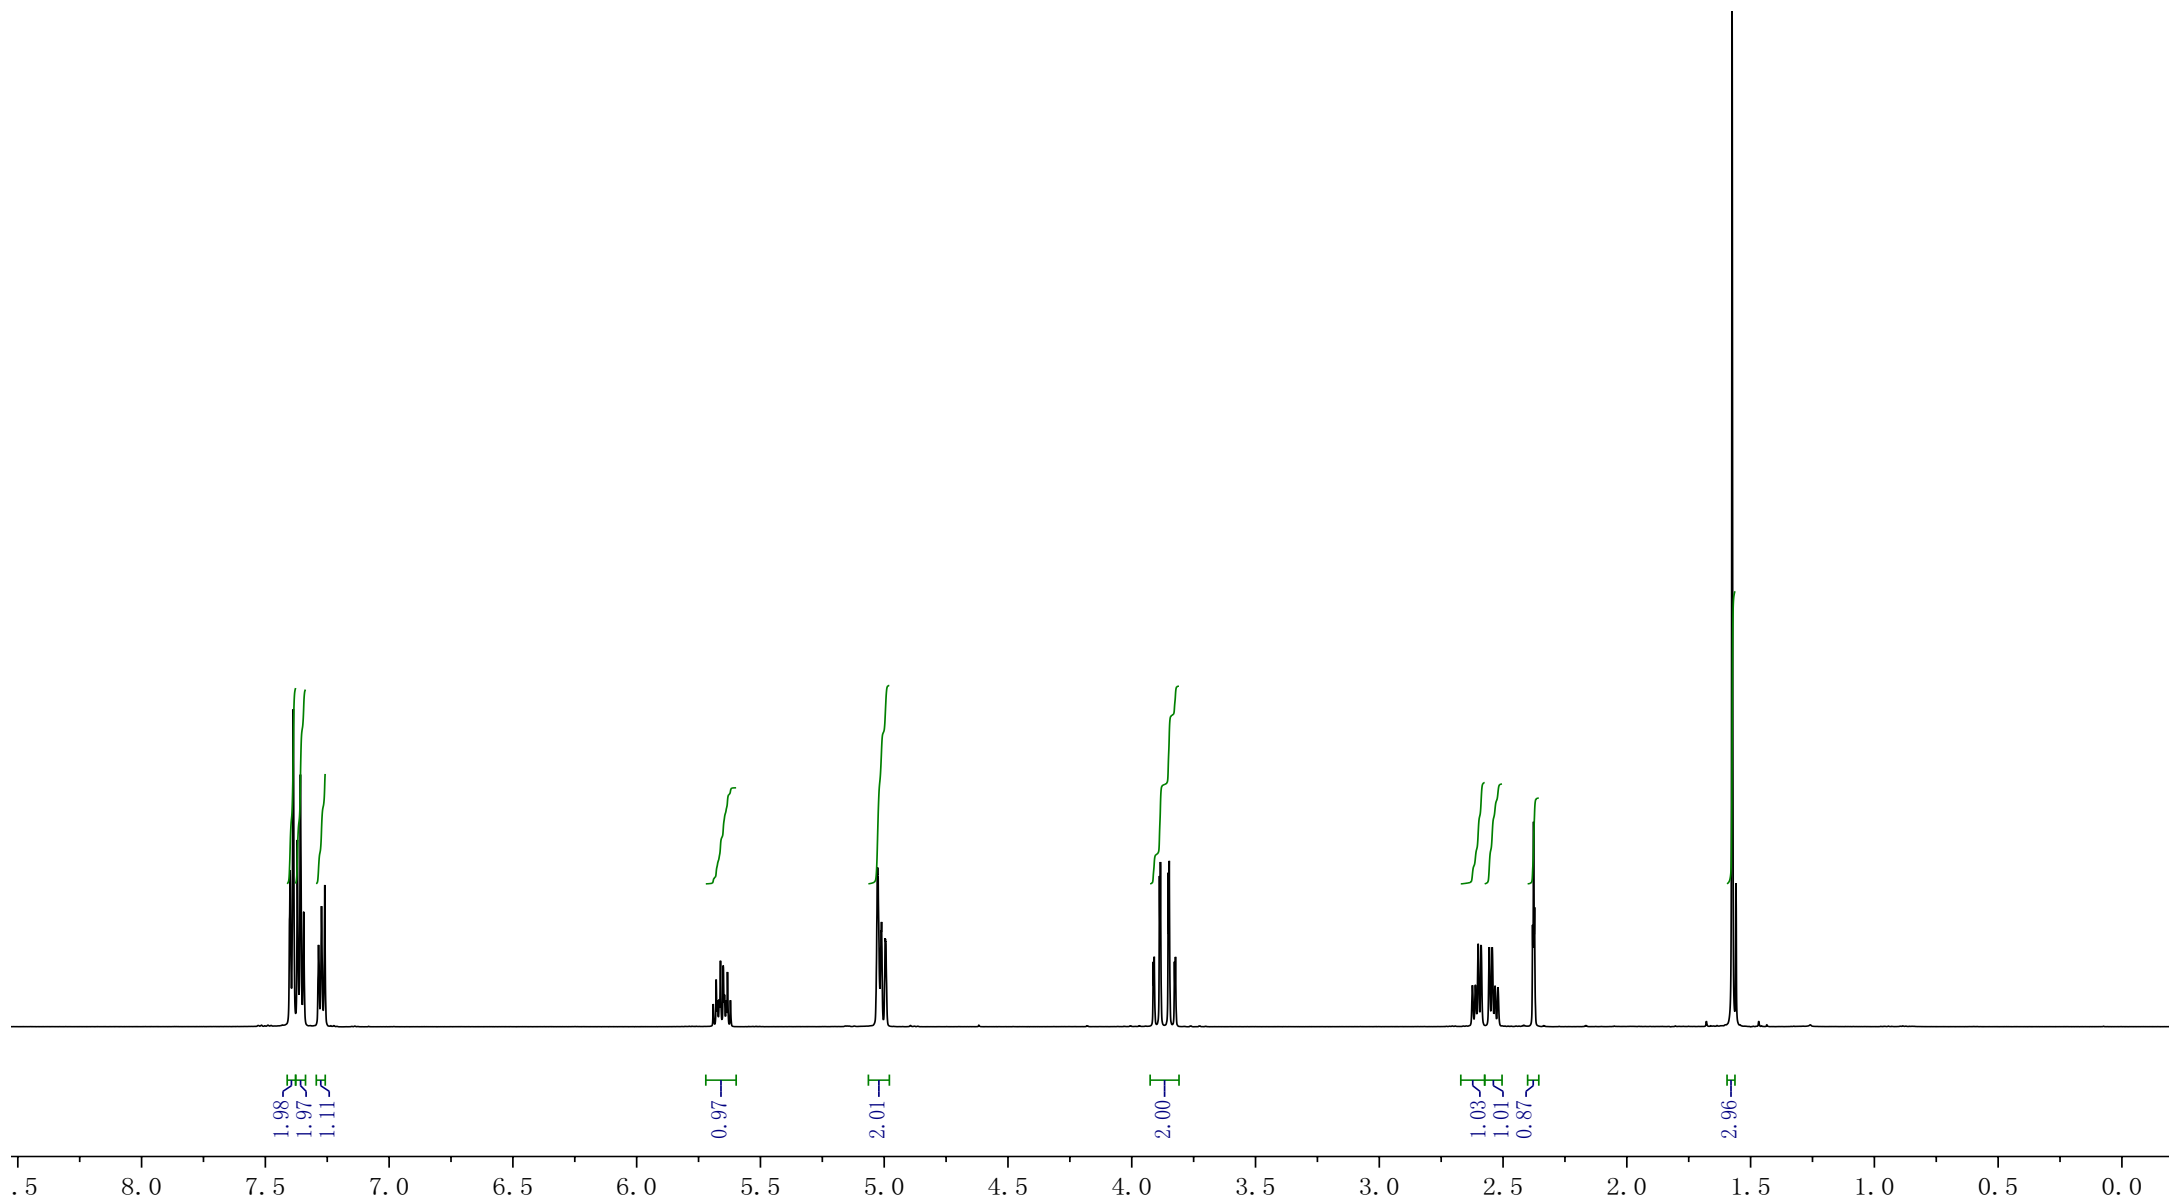

Parameter Value  
Title jkg-V-172B-C  
Solvent cdcl3  
Spectrometer Frequency 150.79  
Nucleus 13C

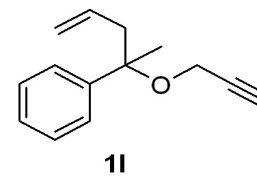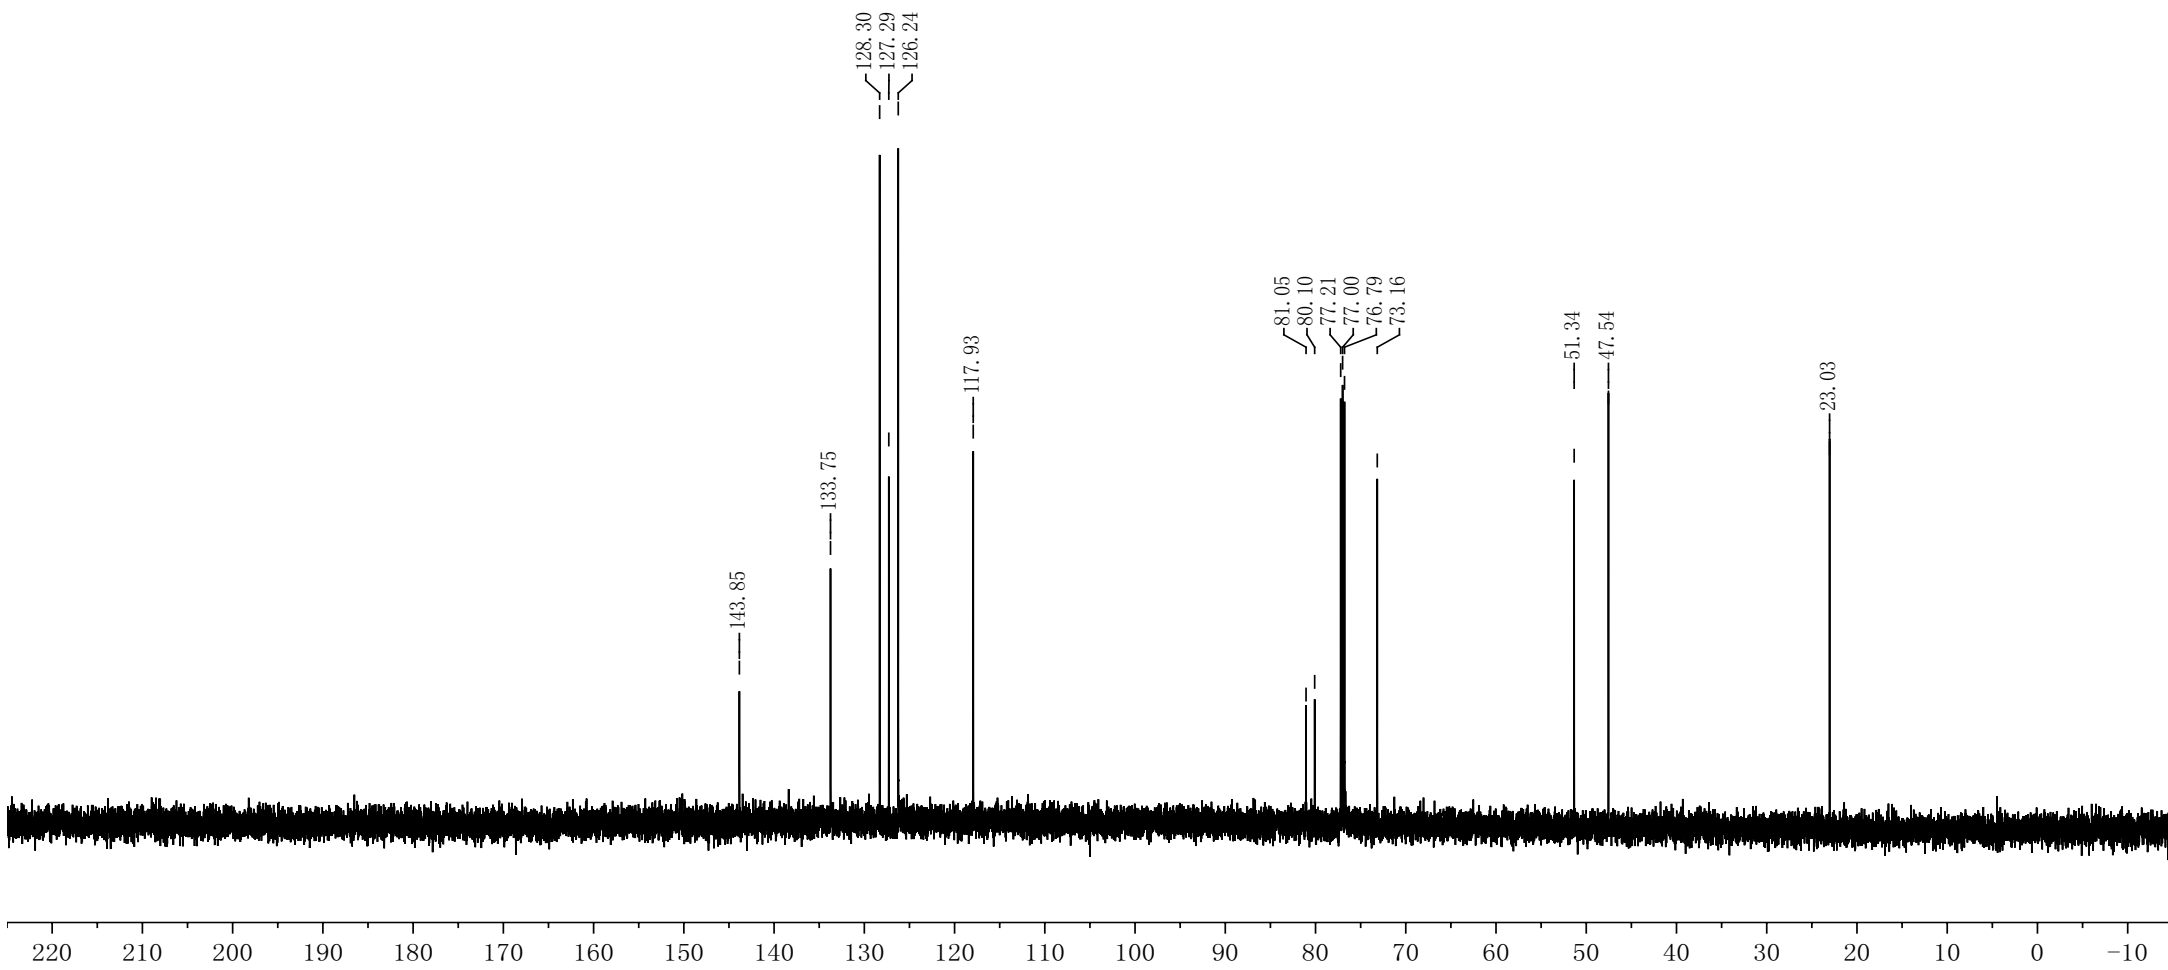

| Parameter              | Value         |
|------------------------|---------------|
| Title                  | jkg-V-151-1-H |
| Solvent                | CDCl3         |
| Spectrometer Frequency | 499.86        |
| Nucleus                | 1H            |

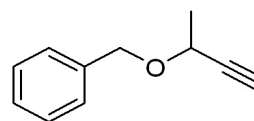

**1n**

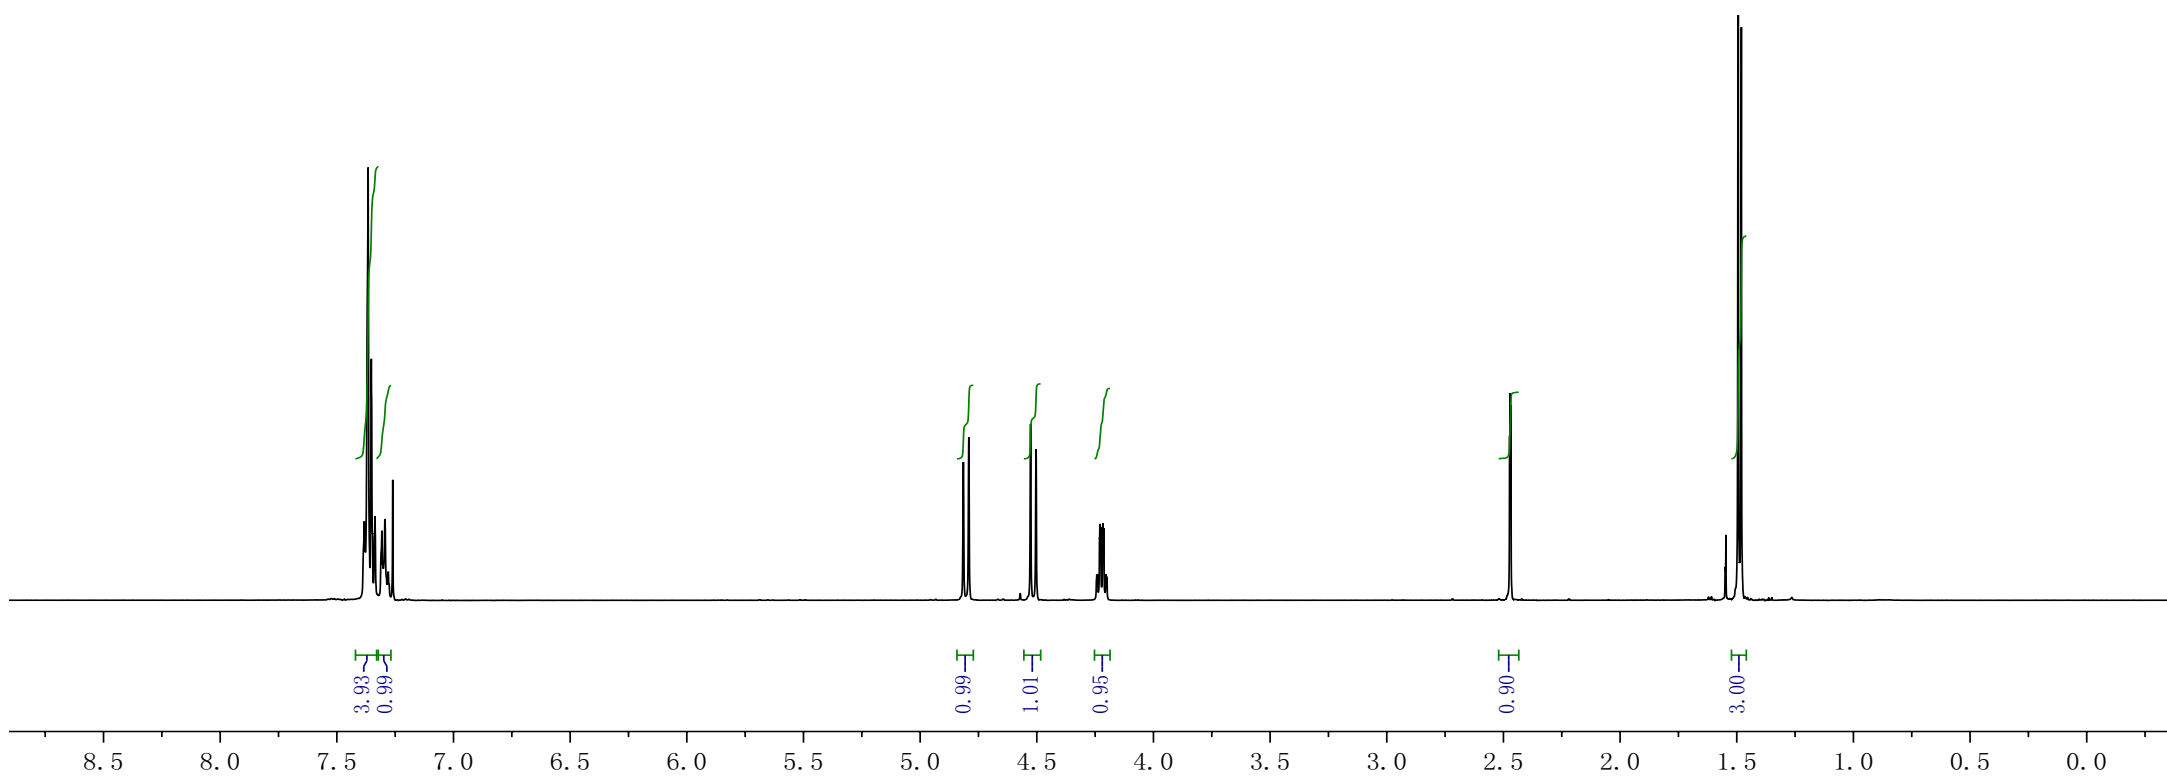

| Parameter              | Value             |
|------------------------|-------------------|
| Title                  | jkg-V-151-1-C     |
| Solvent                | CDCl <sub>3</sub> |
| Spectrometer Frequency | 125.70            |
| Nucleus                | <sup>13</sup> C   |

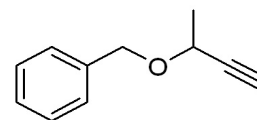

**1n**

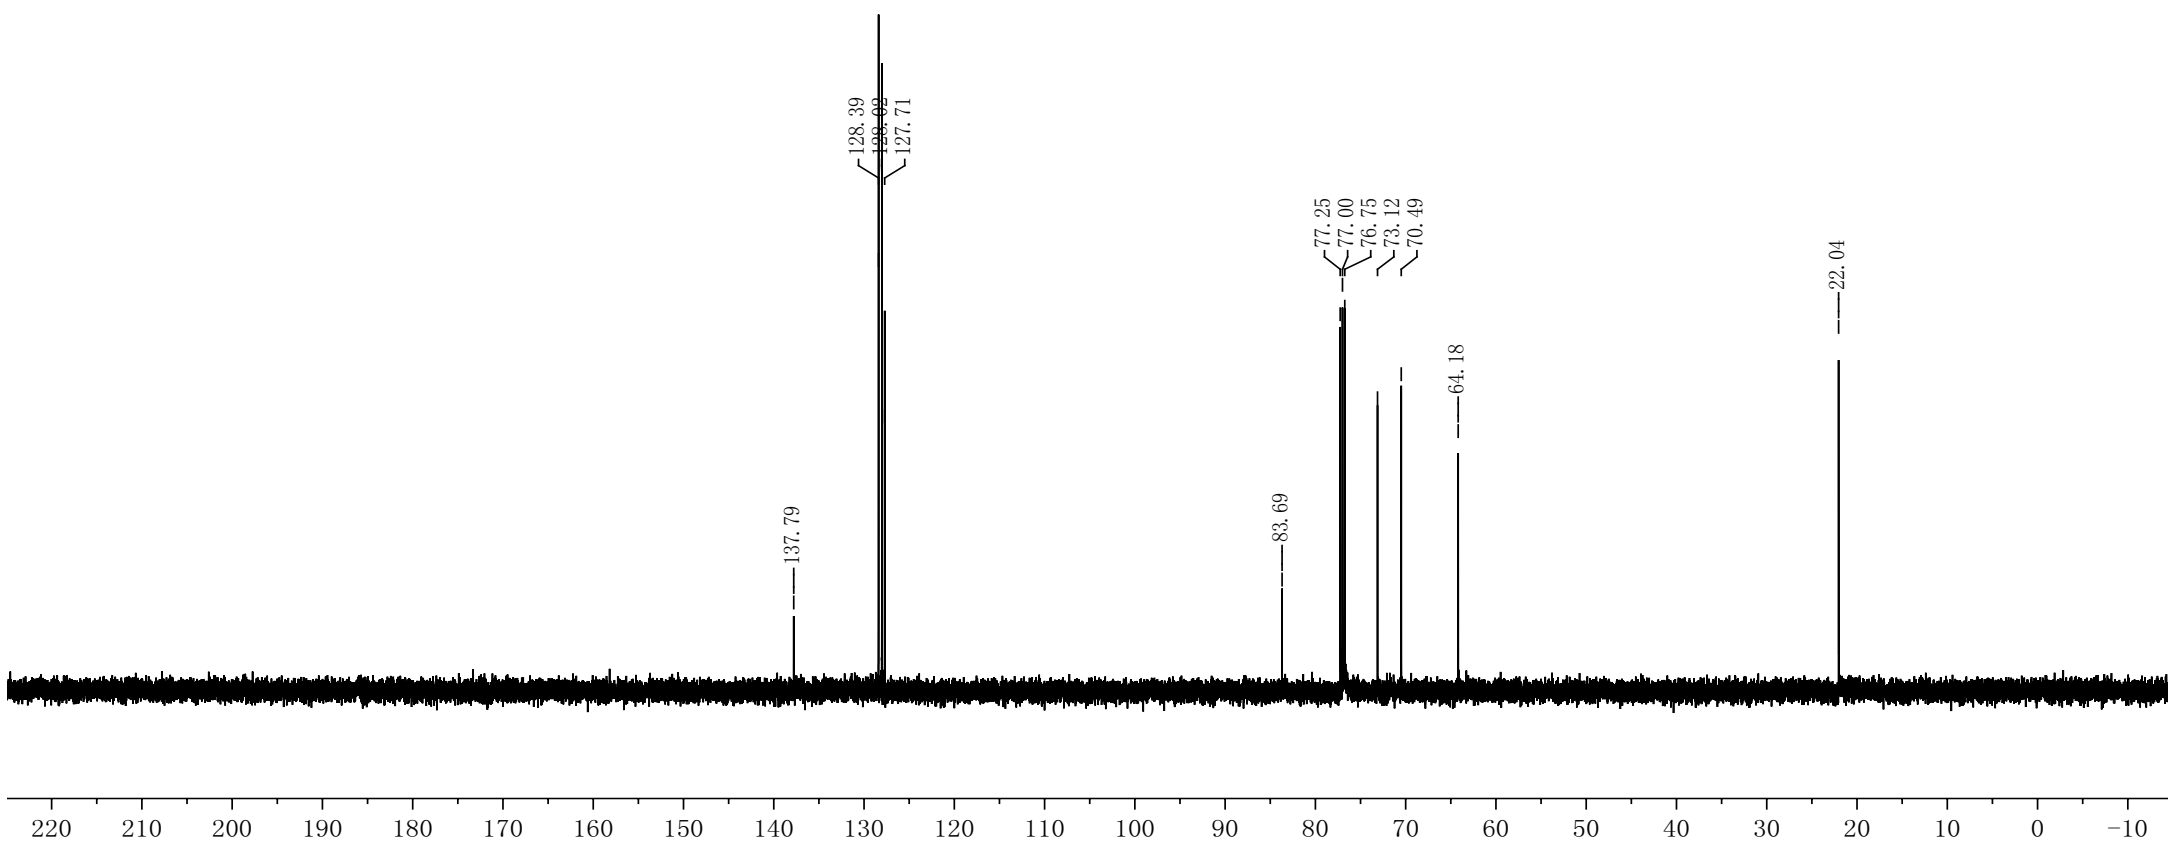



| Parameter                | Value          |
|--------------------------|----------------|
| 1 Title                  | jkg-VI-59A-2-H |
| 2 Solvent                | cdcl3          |
| 3 Temperature            | 25.0           |
| 4 Relaxation Delay       | 10.0000        |
| 5 Spectrometer Frequency | 599.64         |

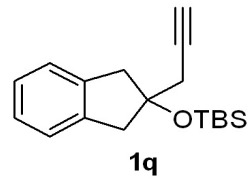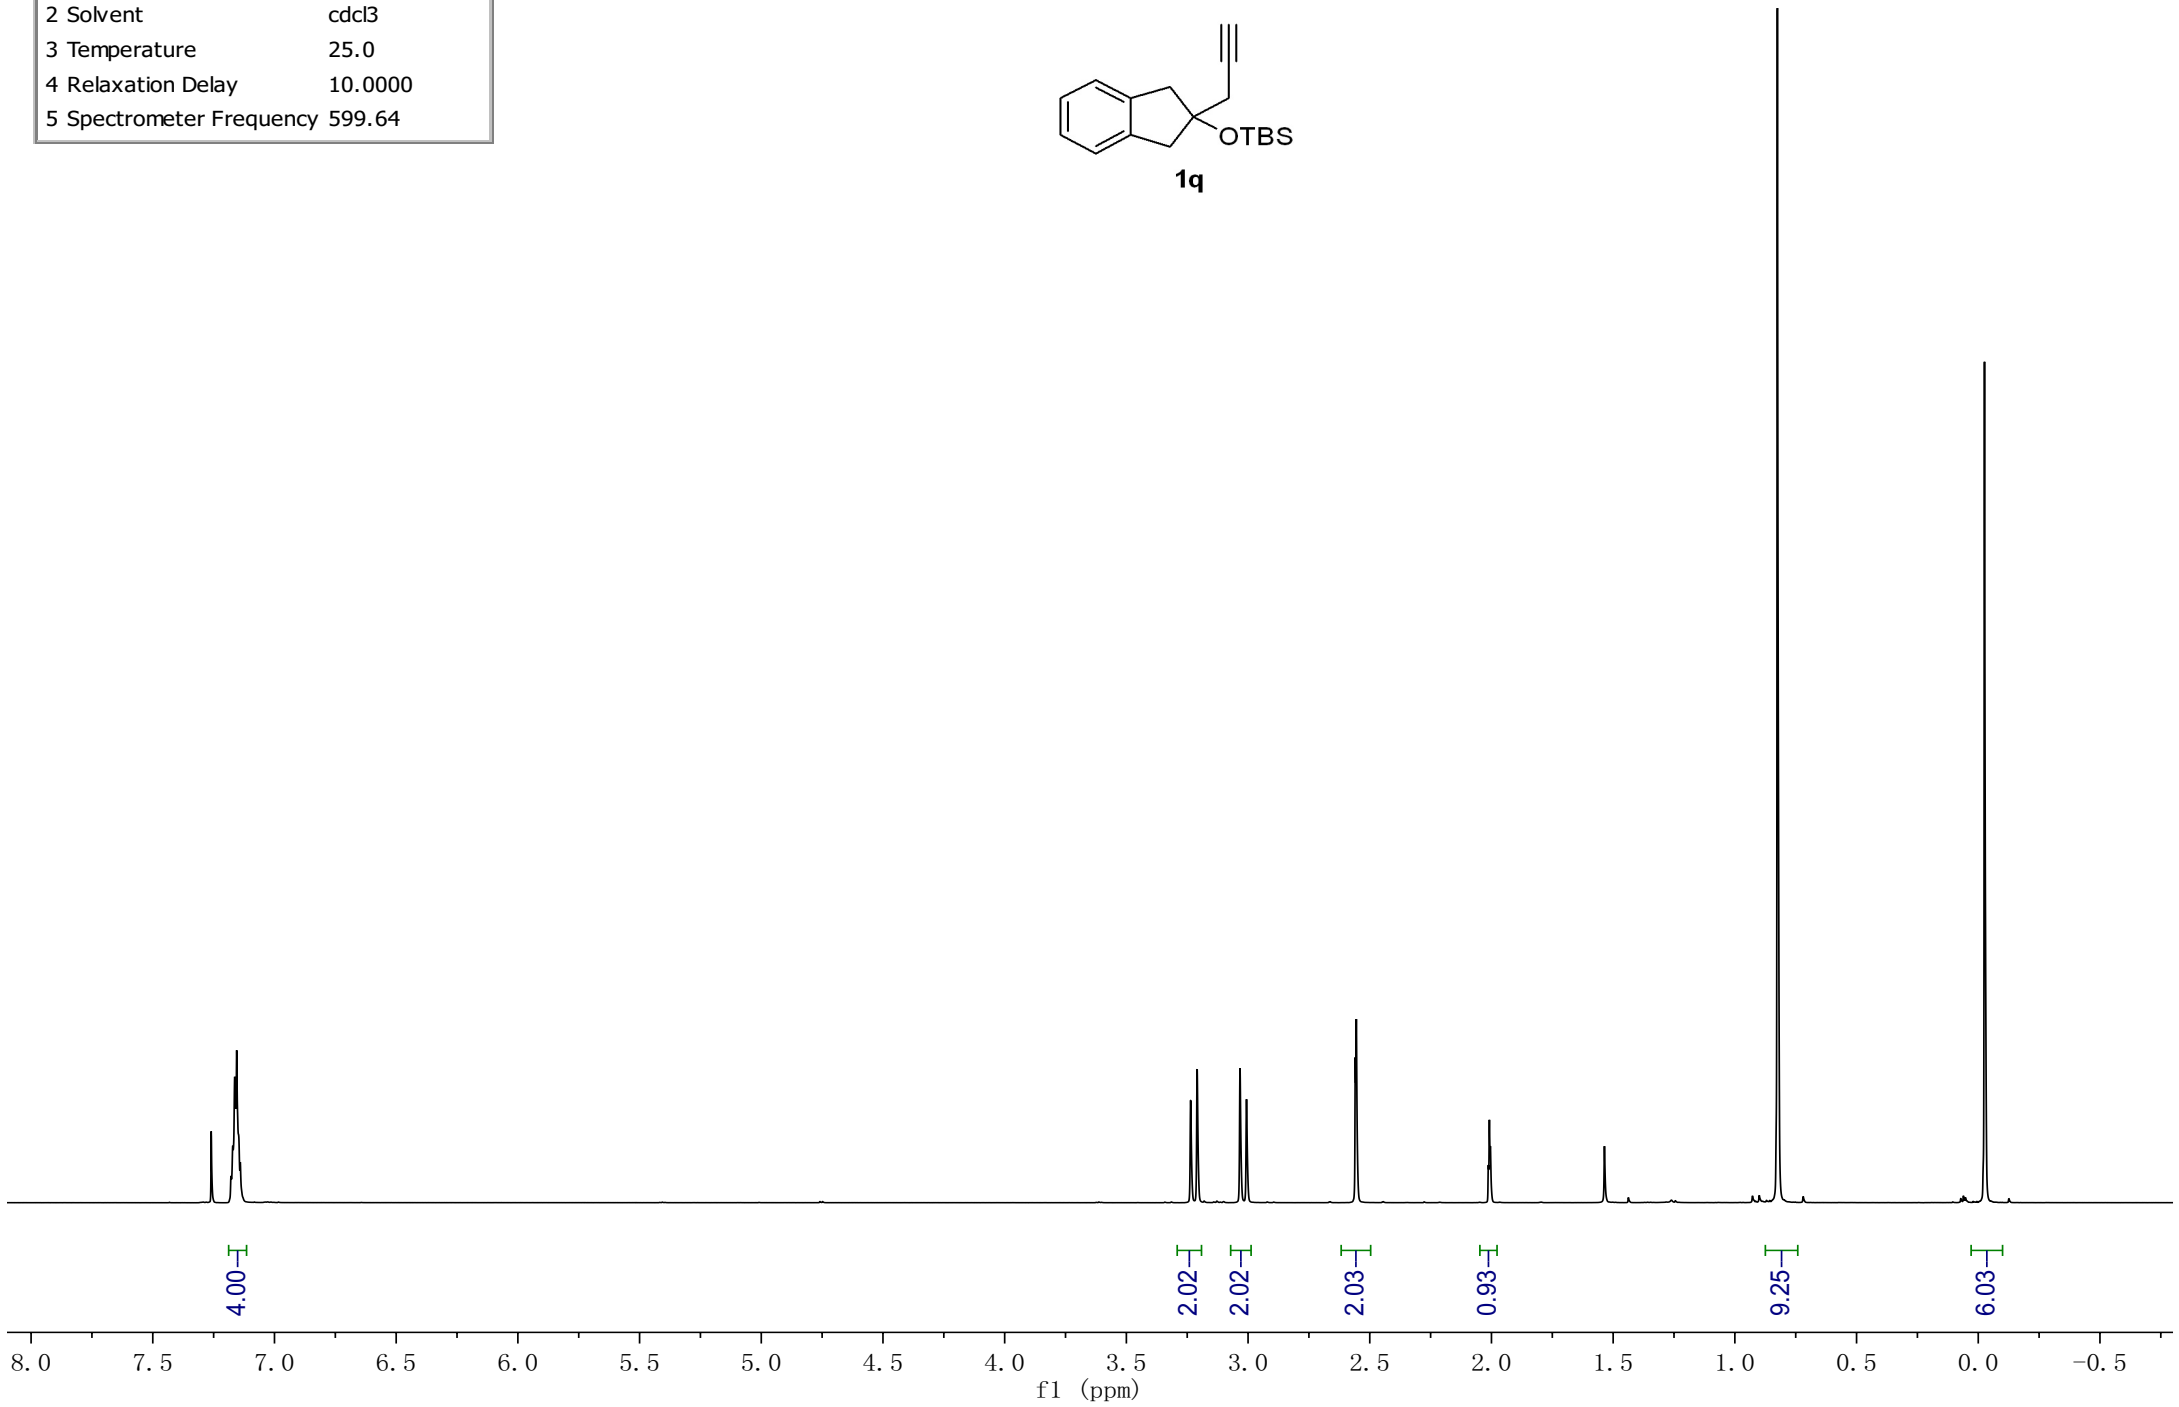

| Parameter                | Value          |
|--------------------------|----------------|
| 1 Title                  | jkg-VI-59A-2-C |
| 2 Solvent                | cdcl3          |
| 3 Temperature            | 25.0           |
| 4 Relaxation Delay       | 1.0000         |
| 5 Spectrometer Frequency | 150.79         |

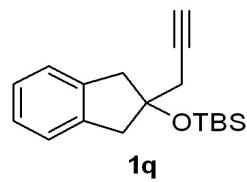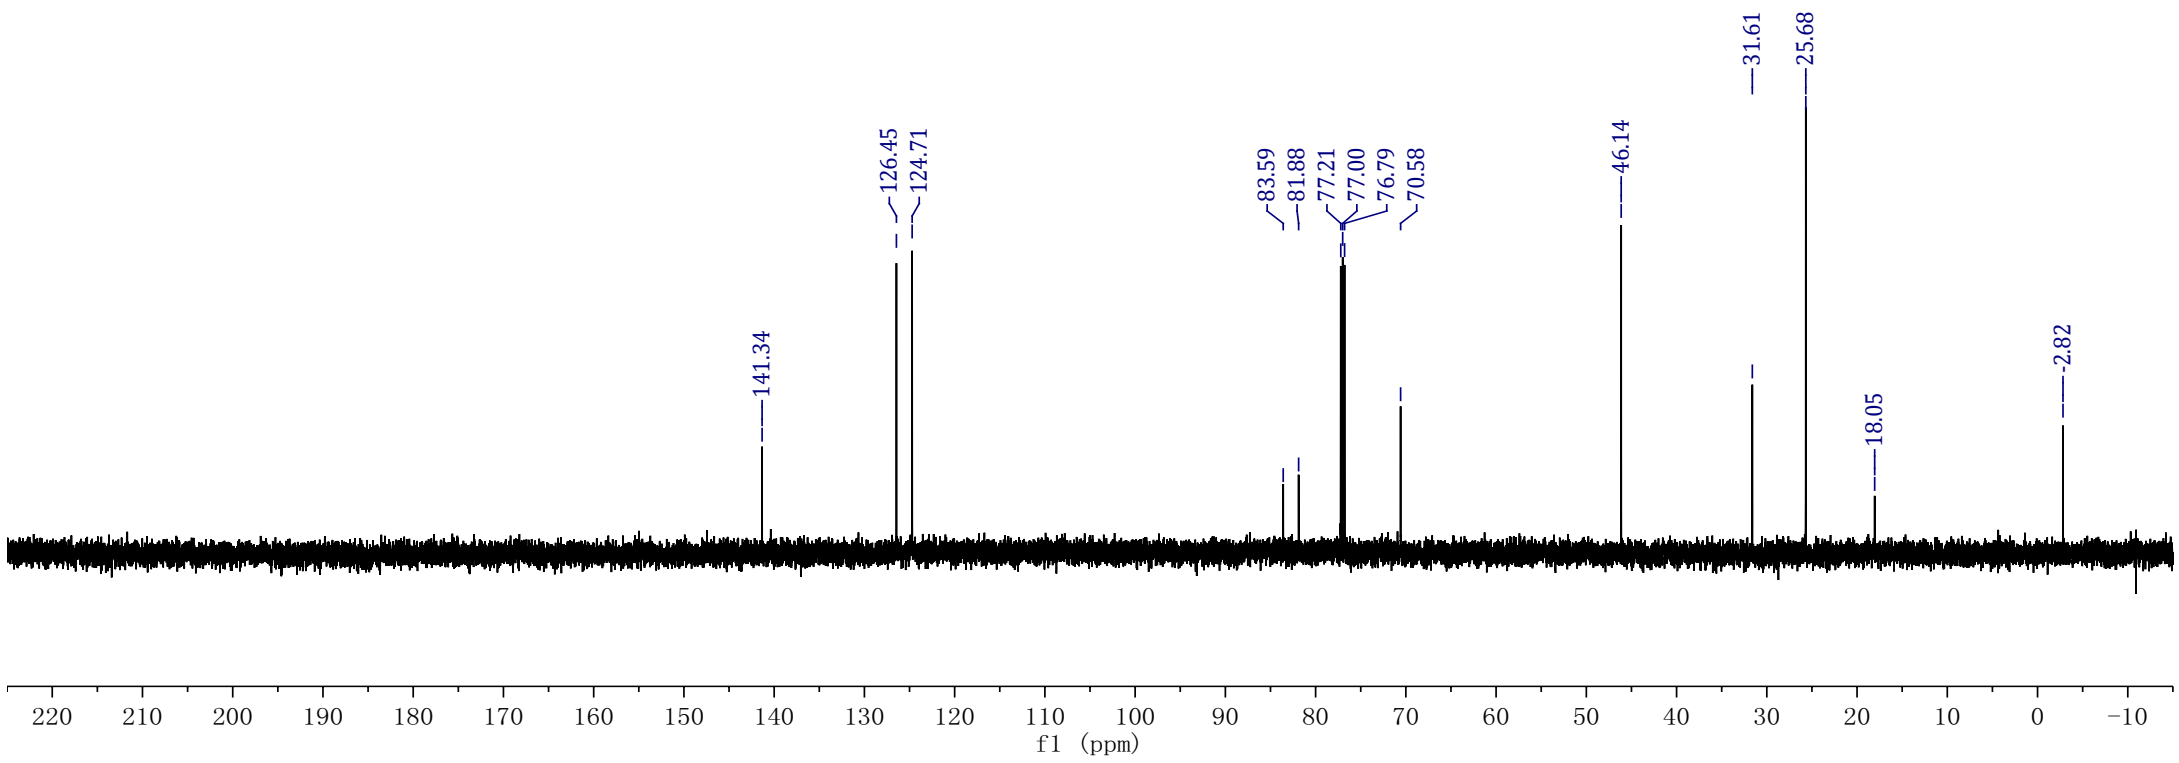

| Parameter                | Value       |
|--------------------------|-------------|
| 1 Title                  | jkg-VI-5b-H |
| 2 Solvent                | CDCl3       |
| 3 Temperature            | 80.0        |
| 4 Relaxation Delay       | 10.0000     |
| 5 Spectrometer Frequency | 499.86      |

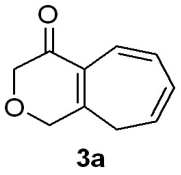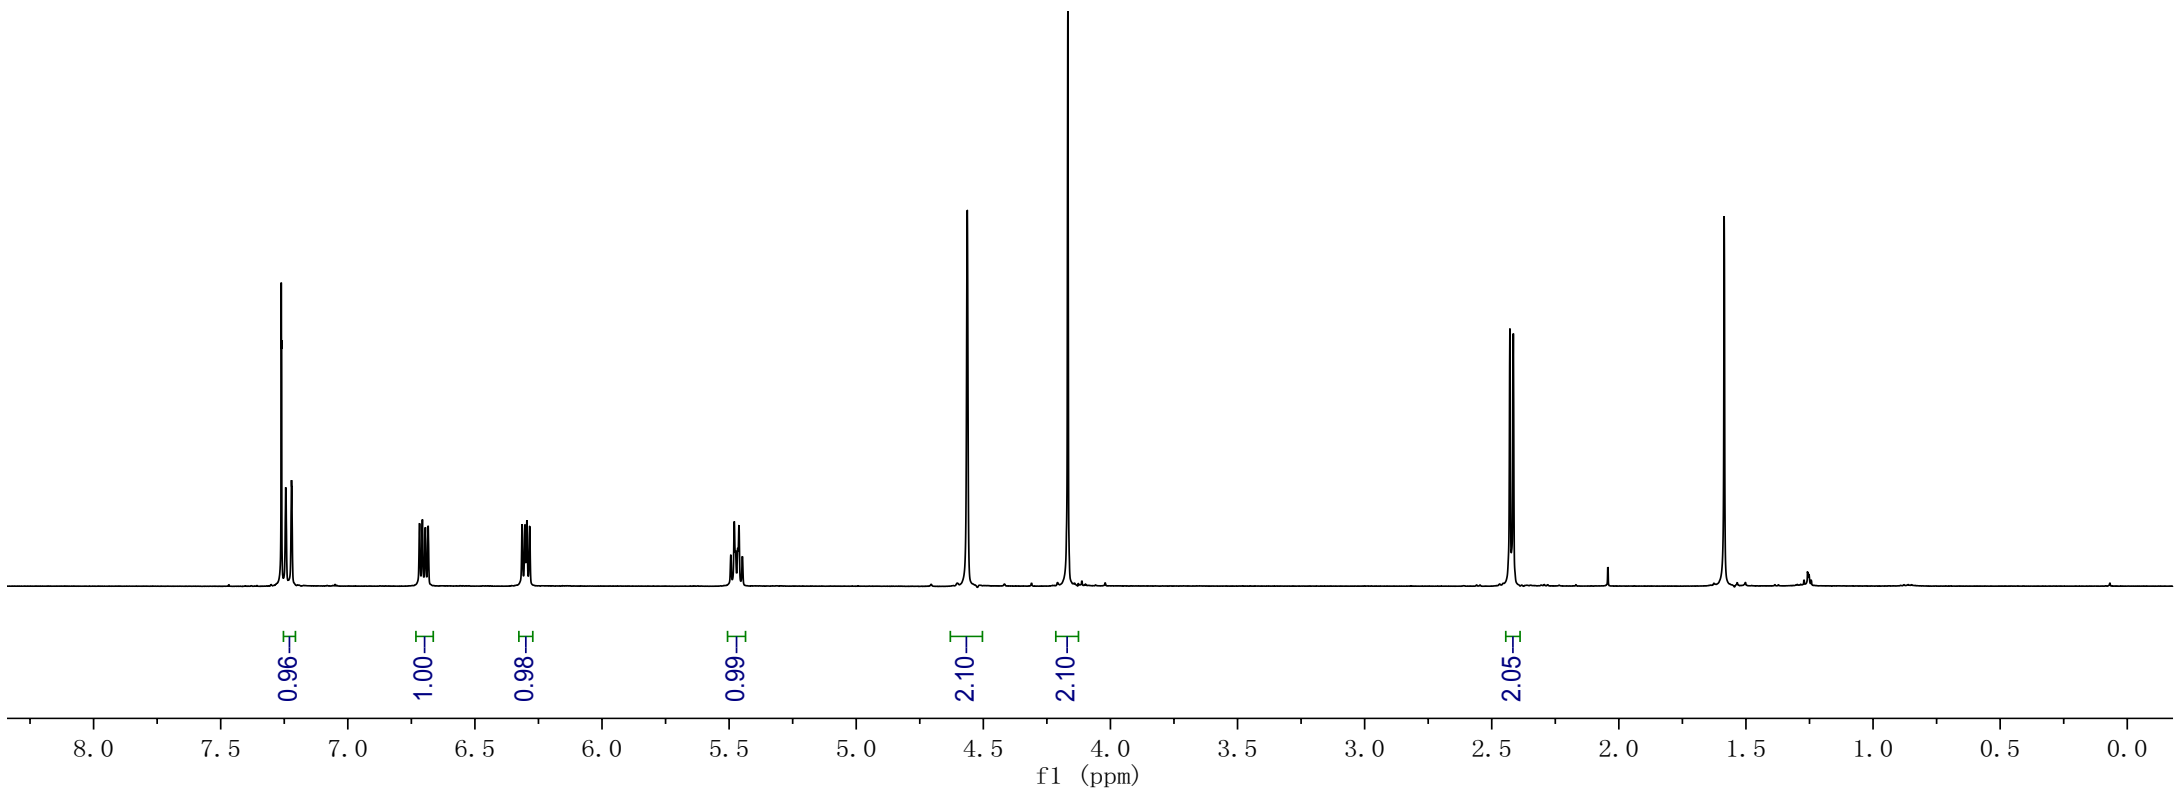

| Parameter                | Value       |
|--------------------------|-------------|
| 1 Title                  | jkg-VI-5b-C |
| 2 Solvent                | CDCl3       |
| 3 Temperature            | 80.0        |
| 4 Relaxation Delay       | 1.0000      |
| 5 Spectrometer Frequency | 125.70      |

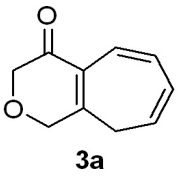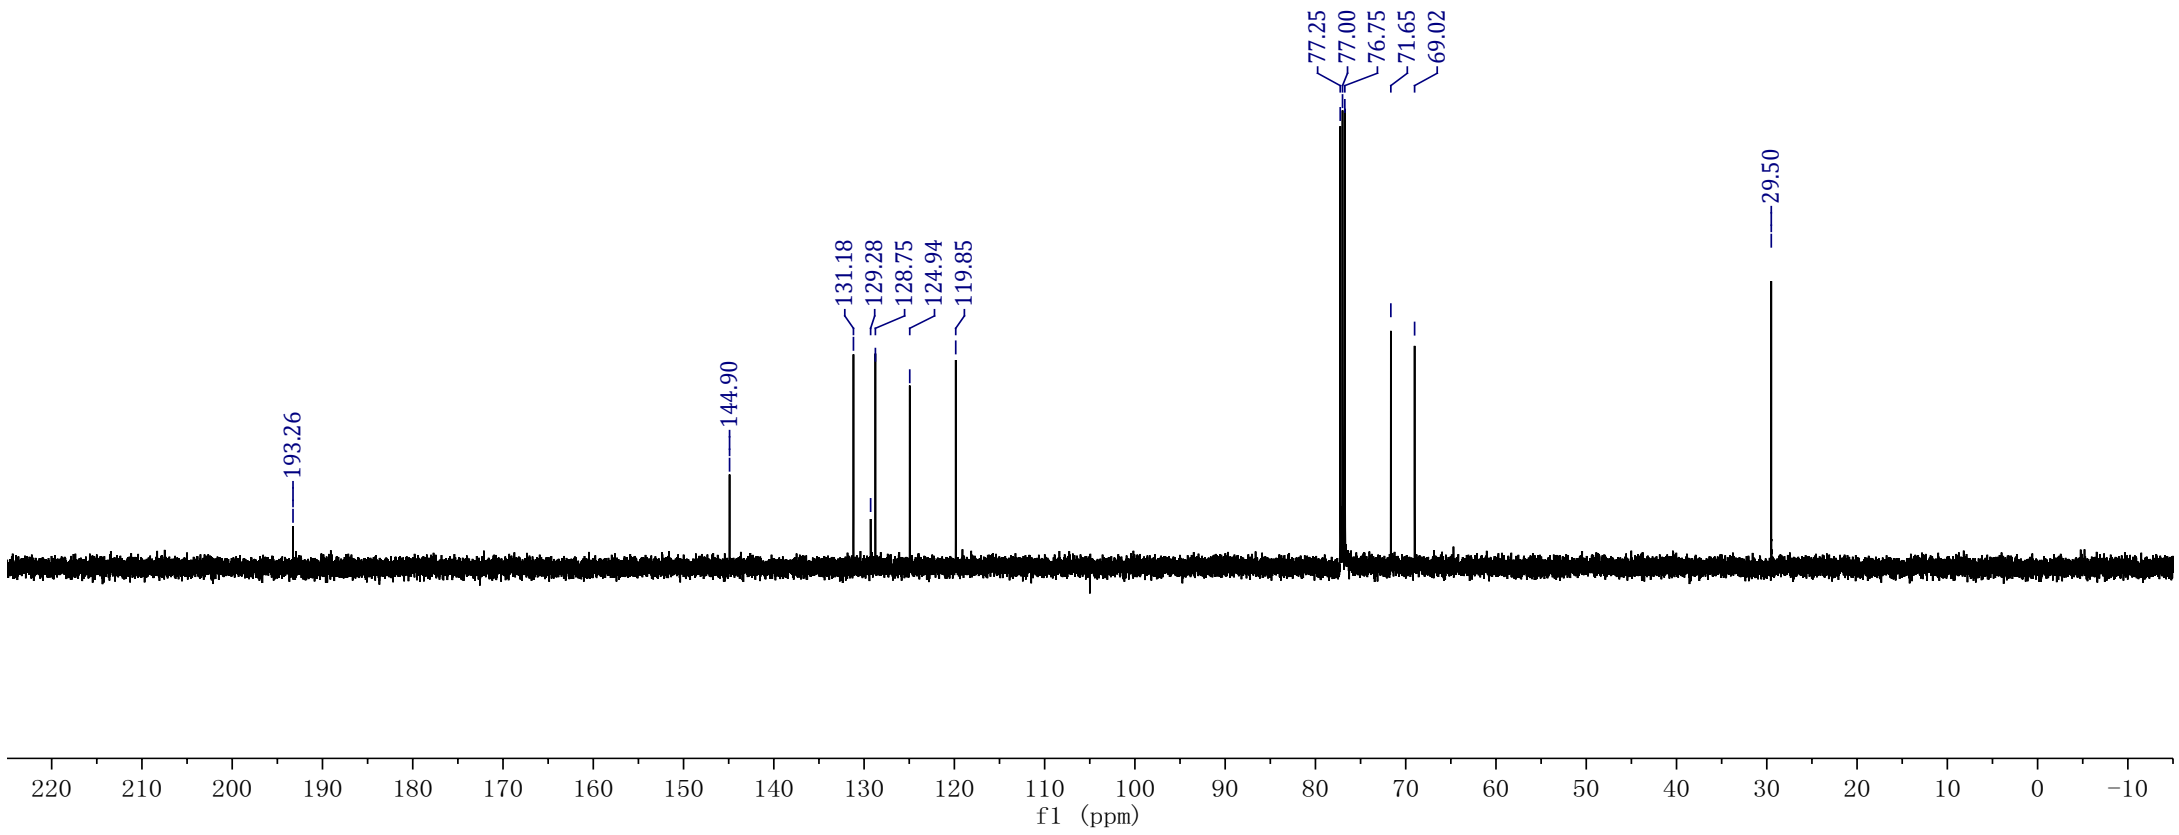

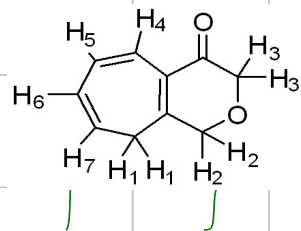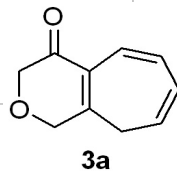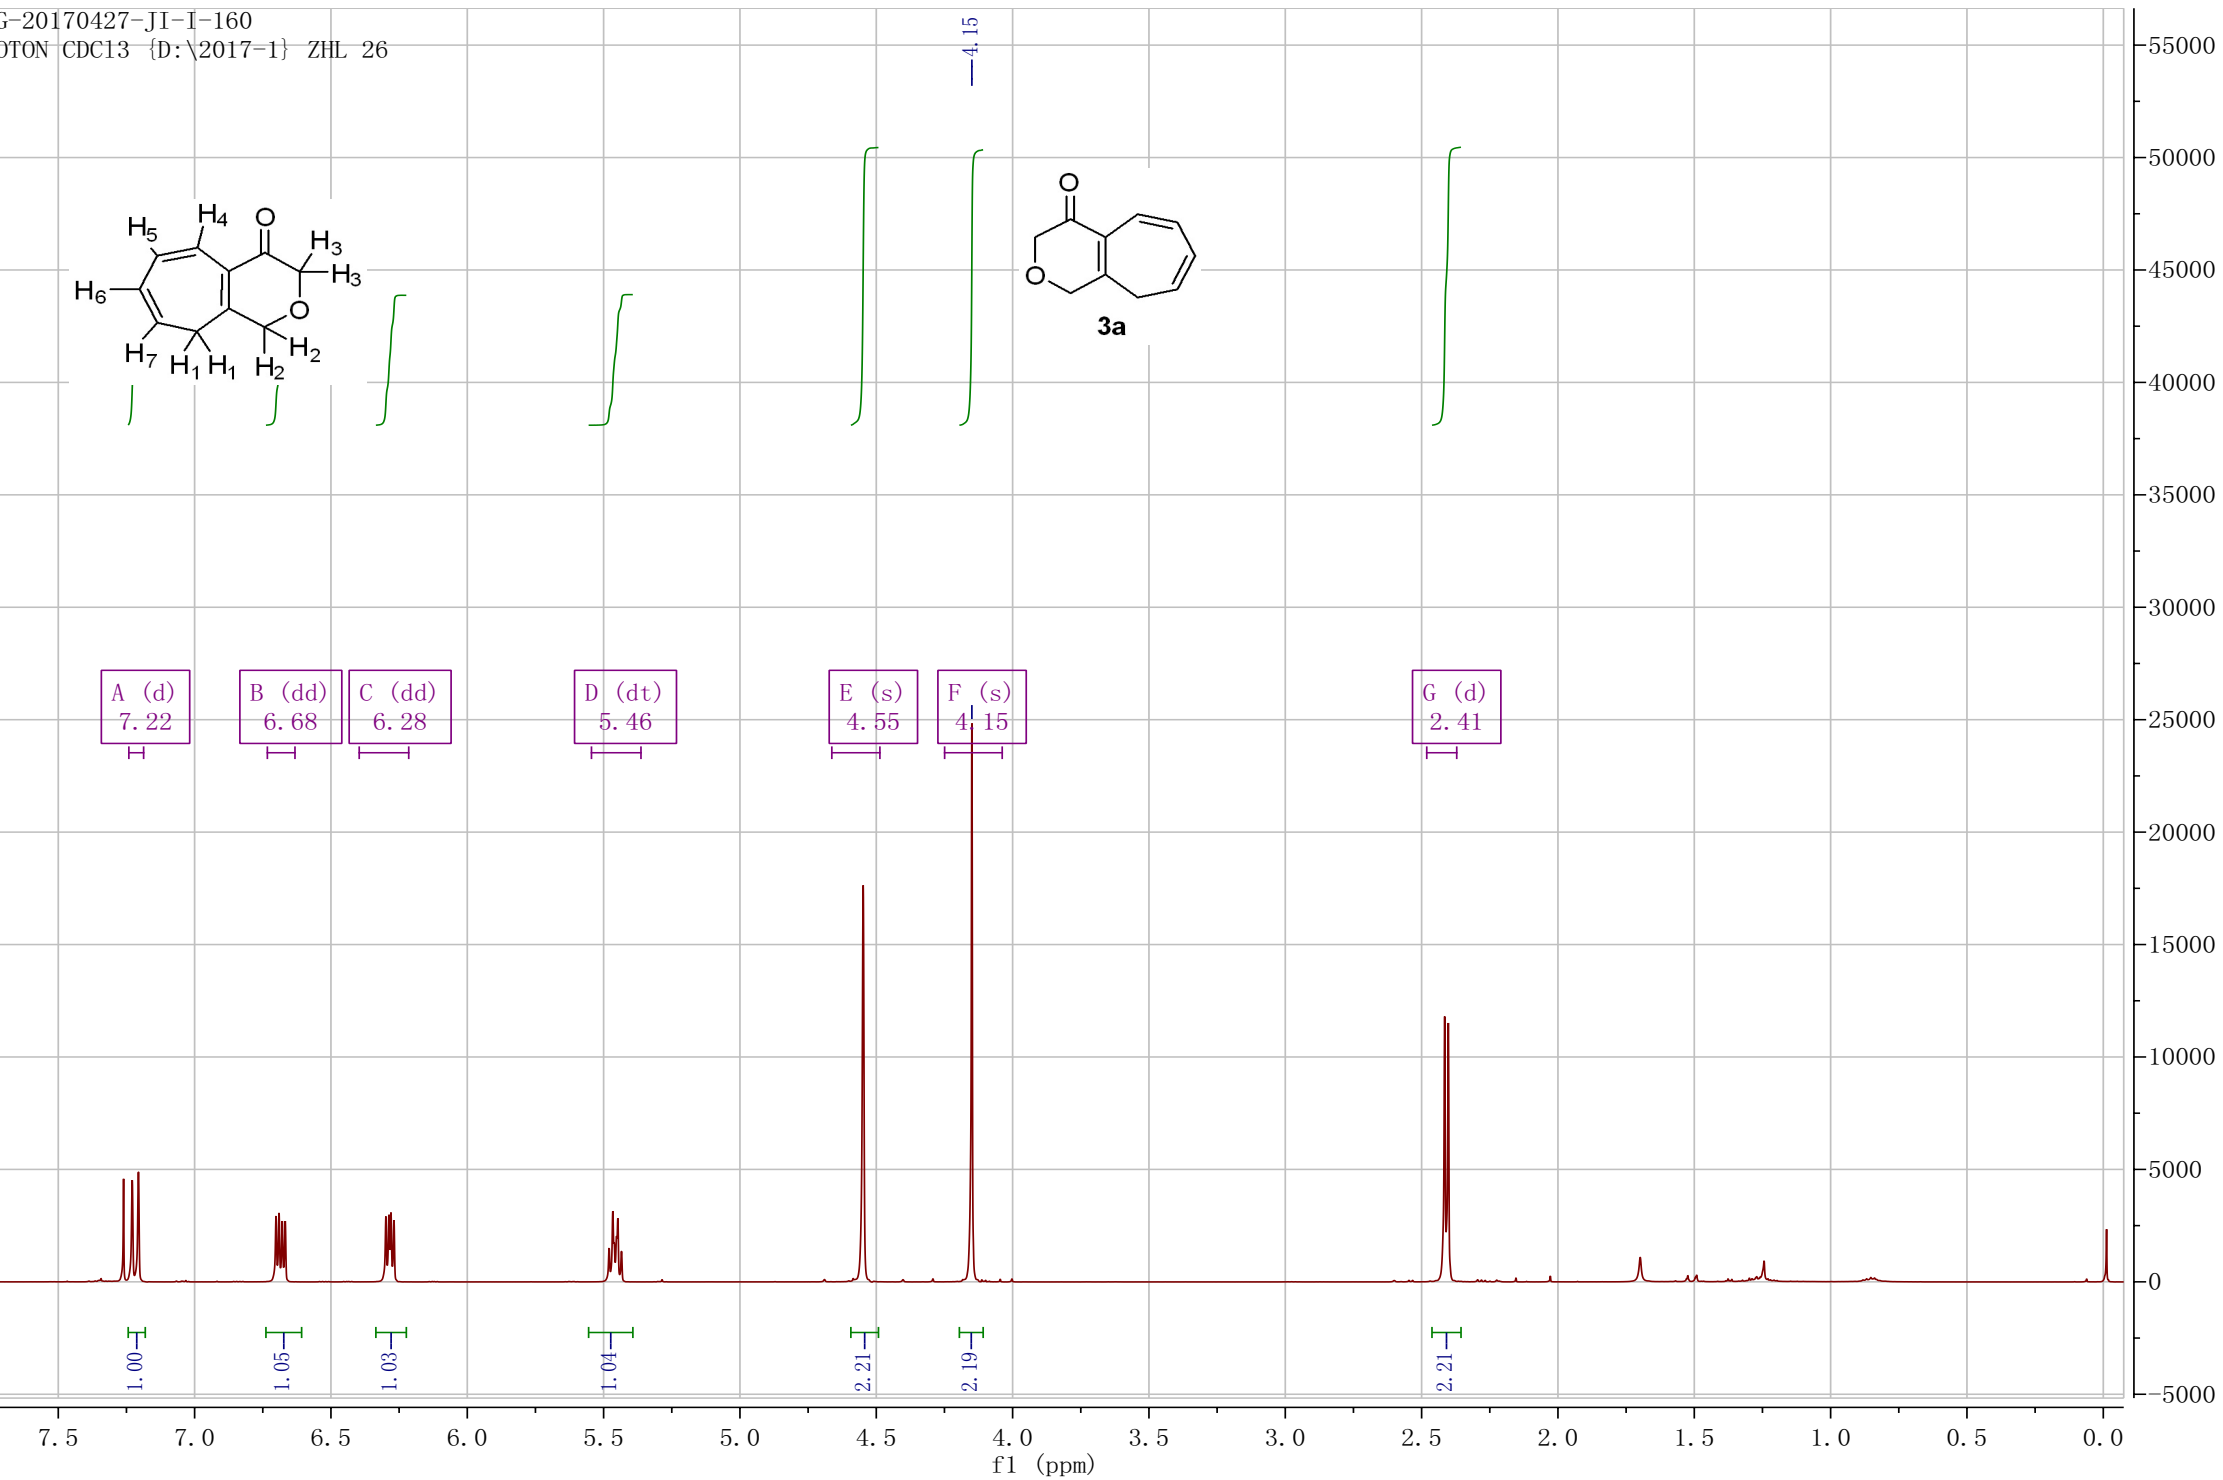

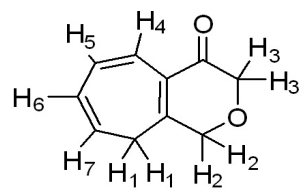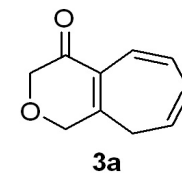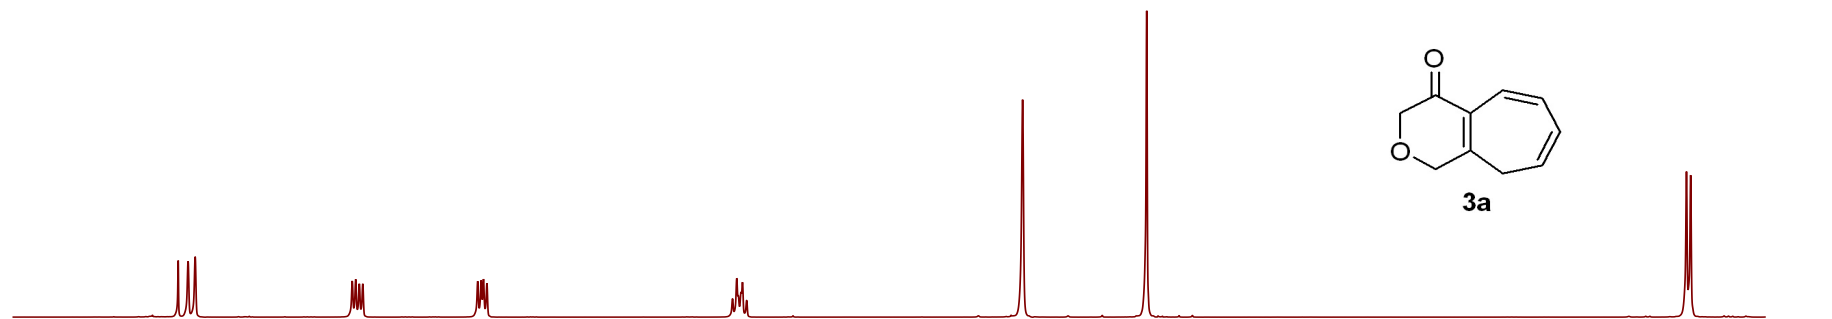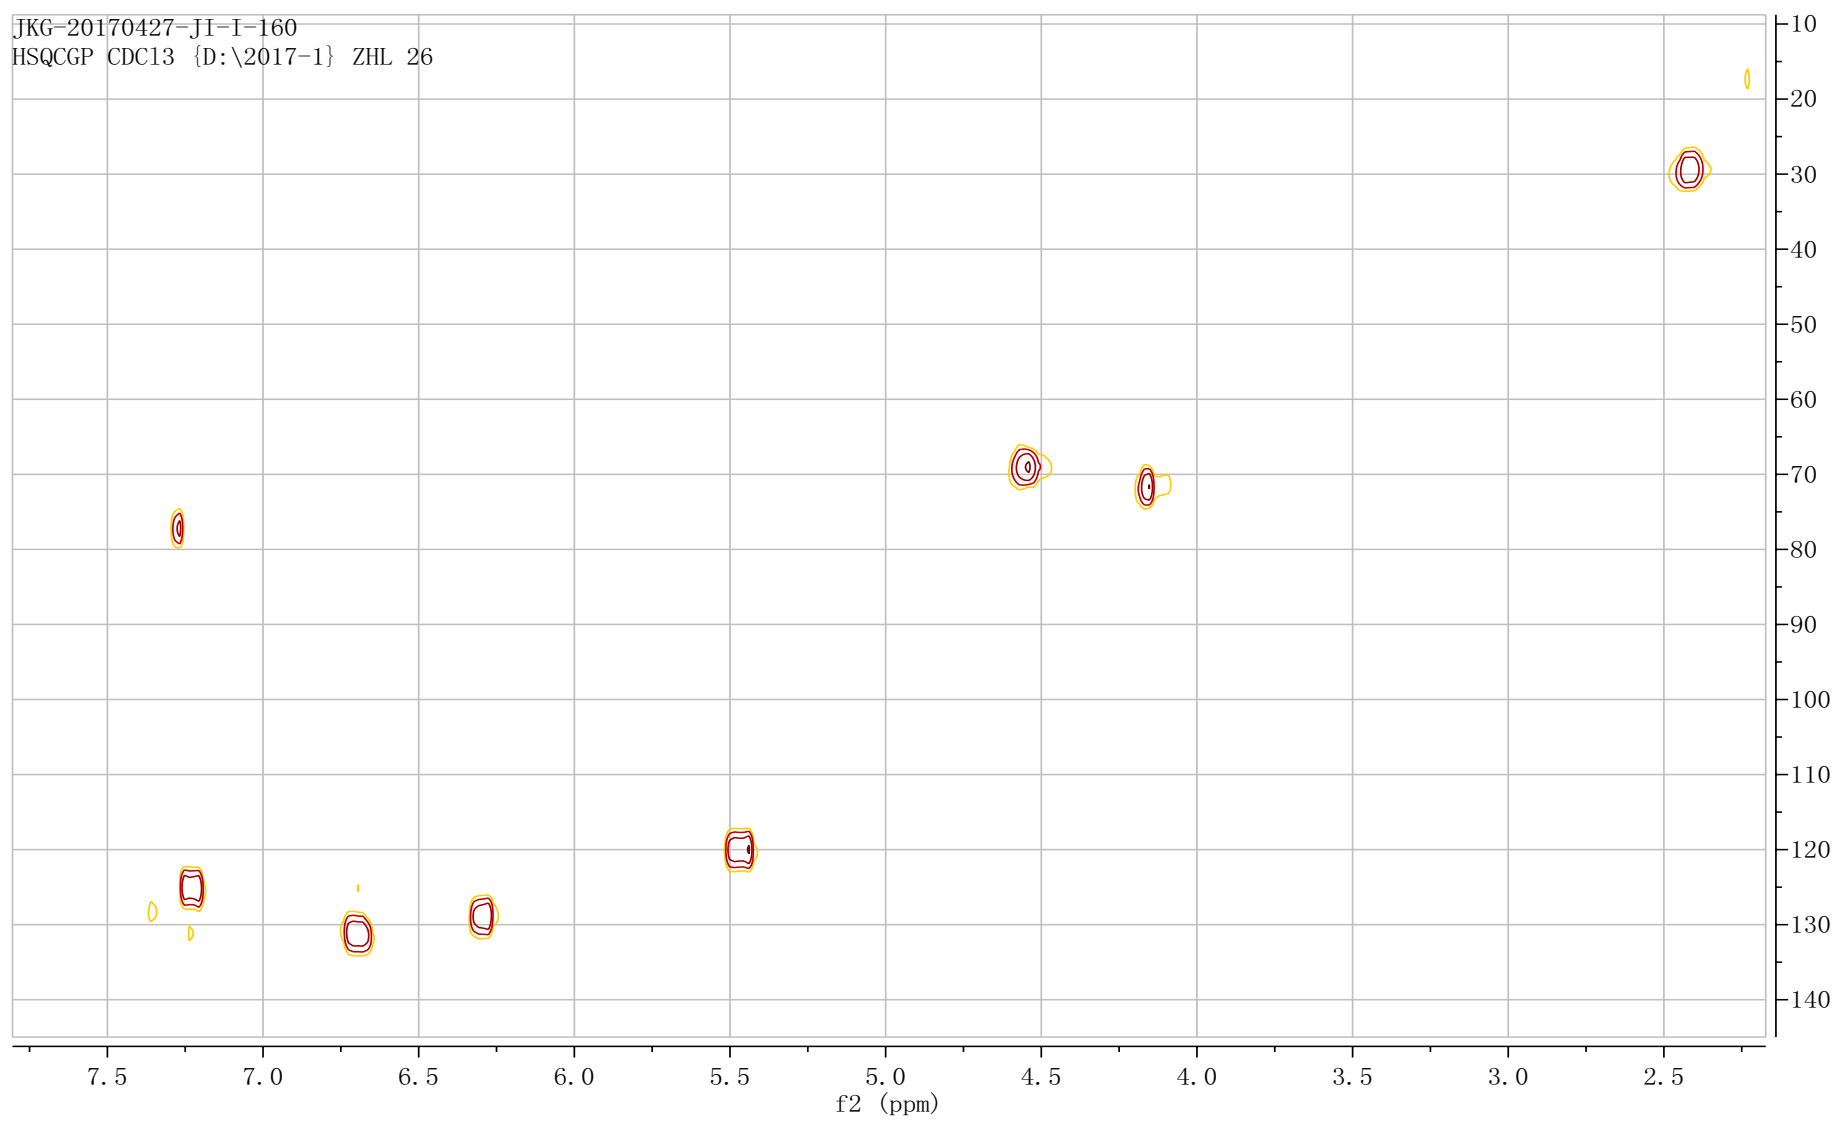

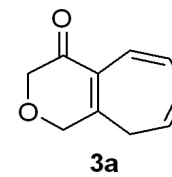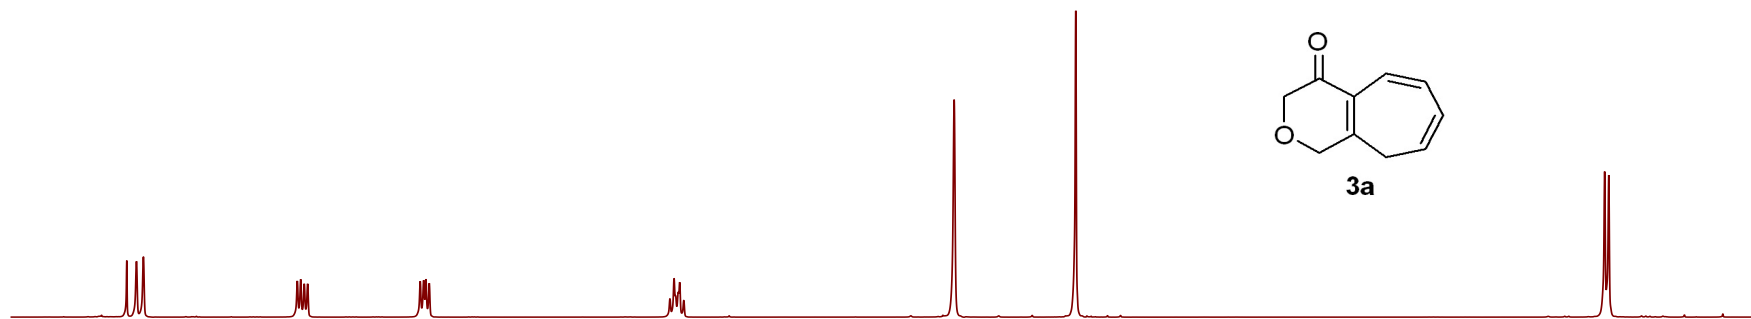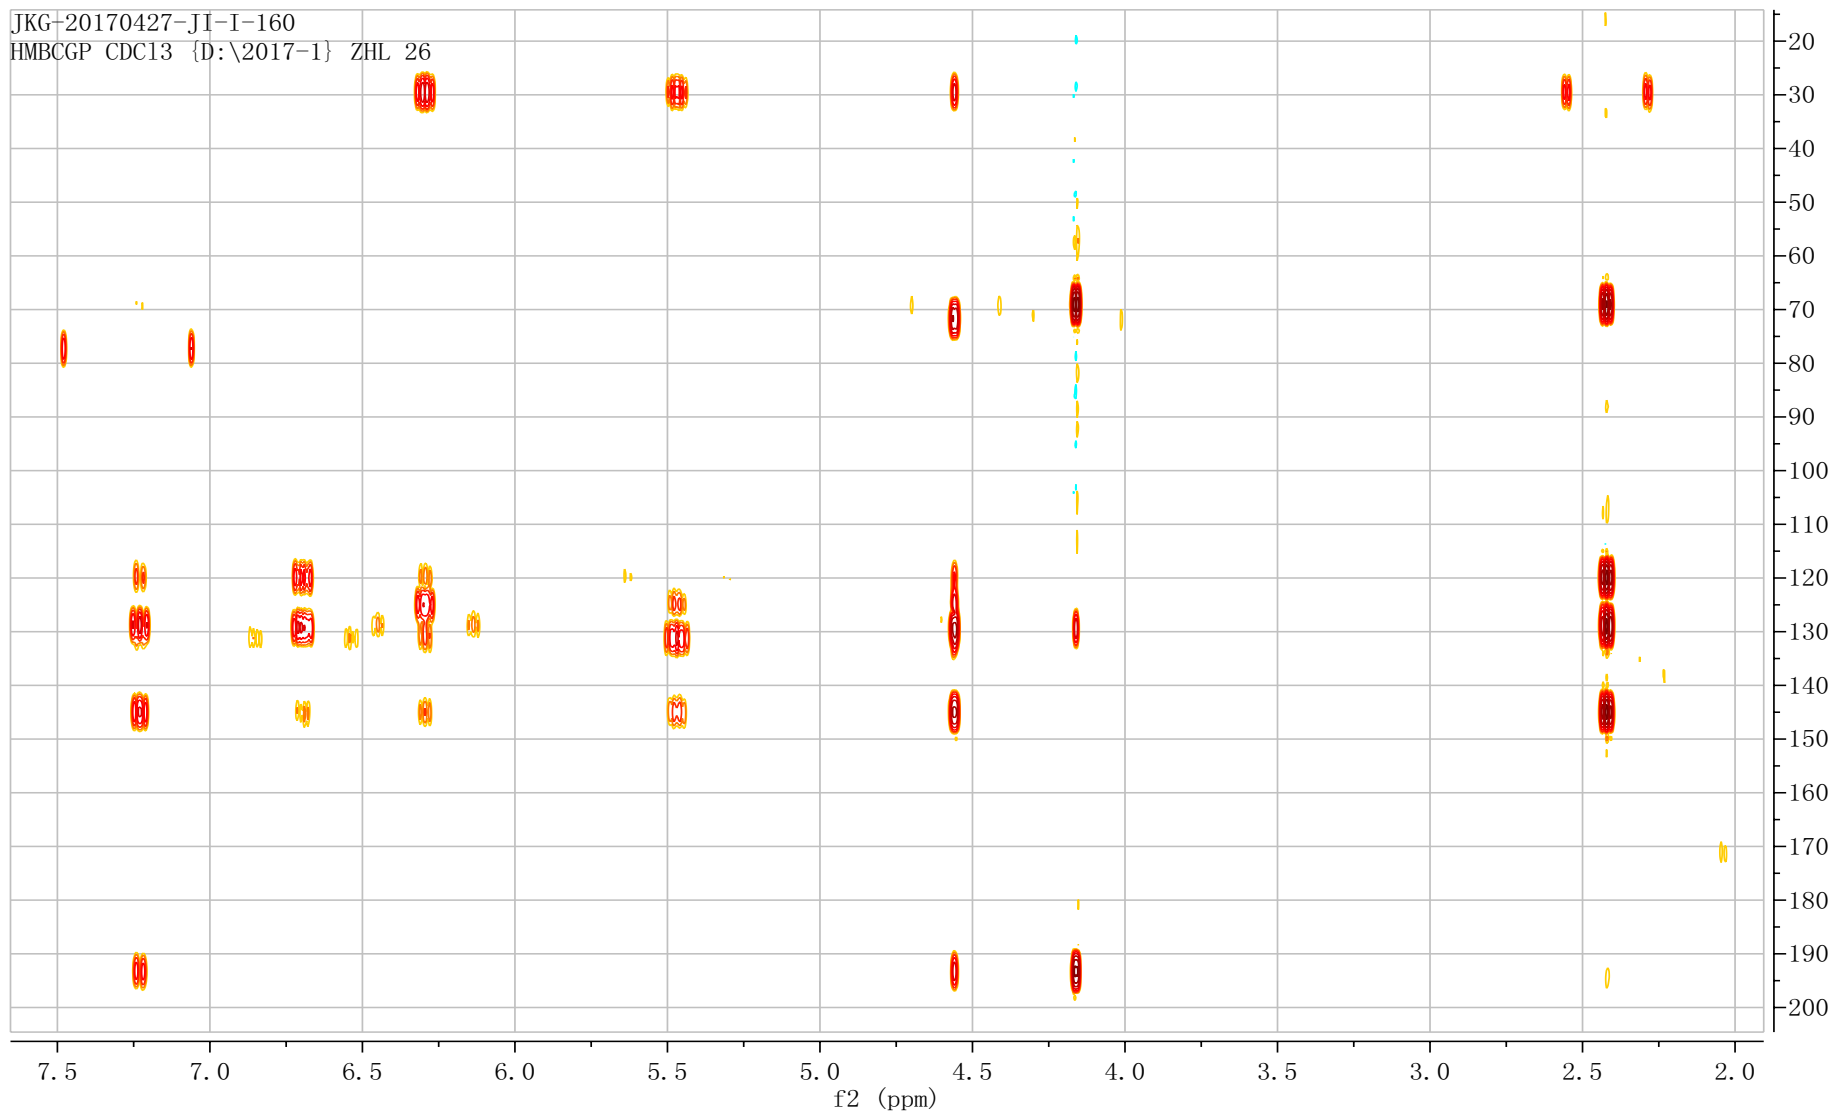

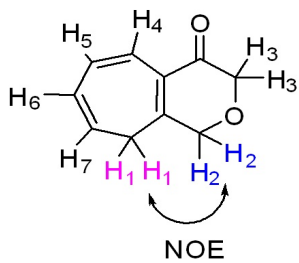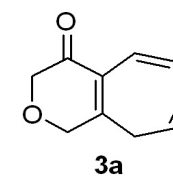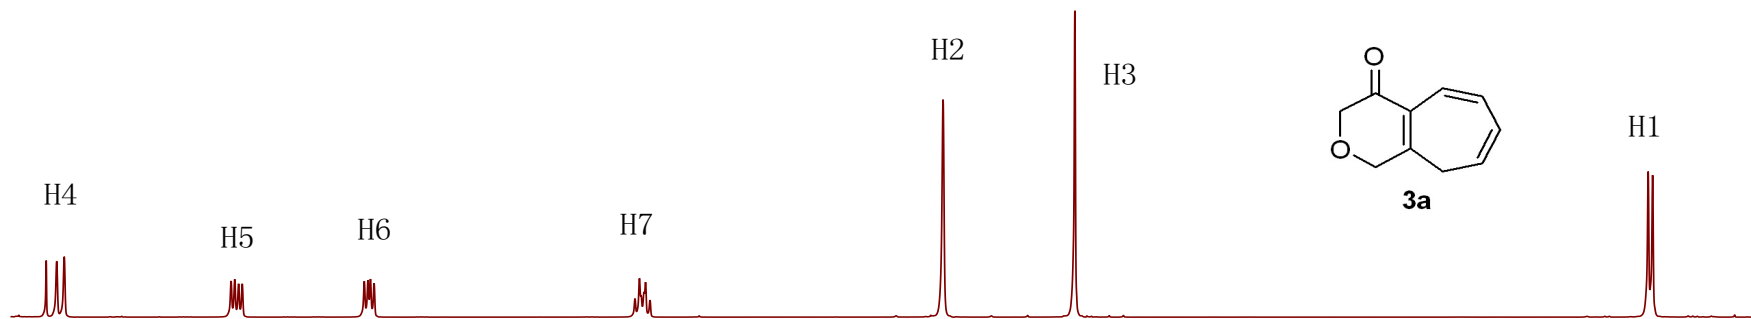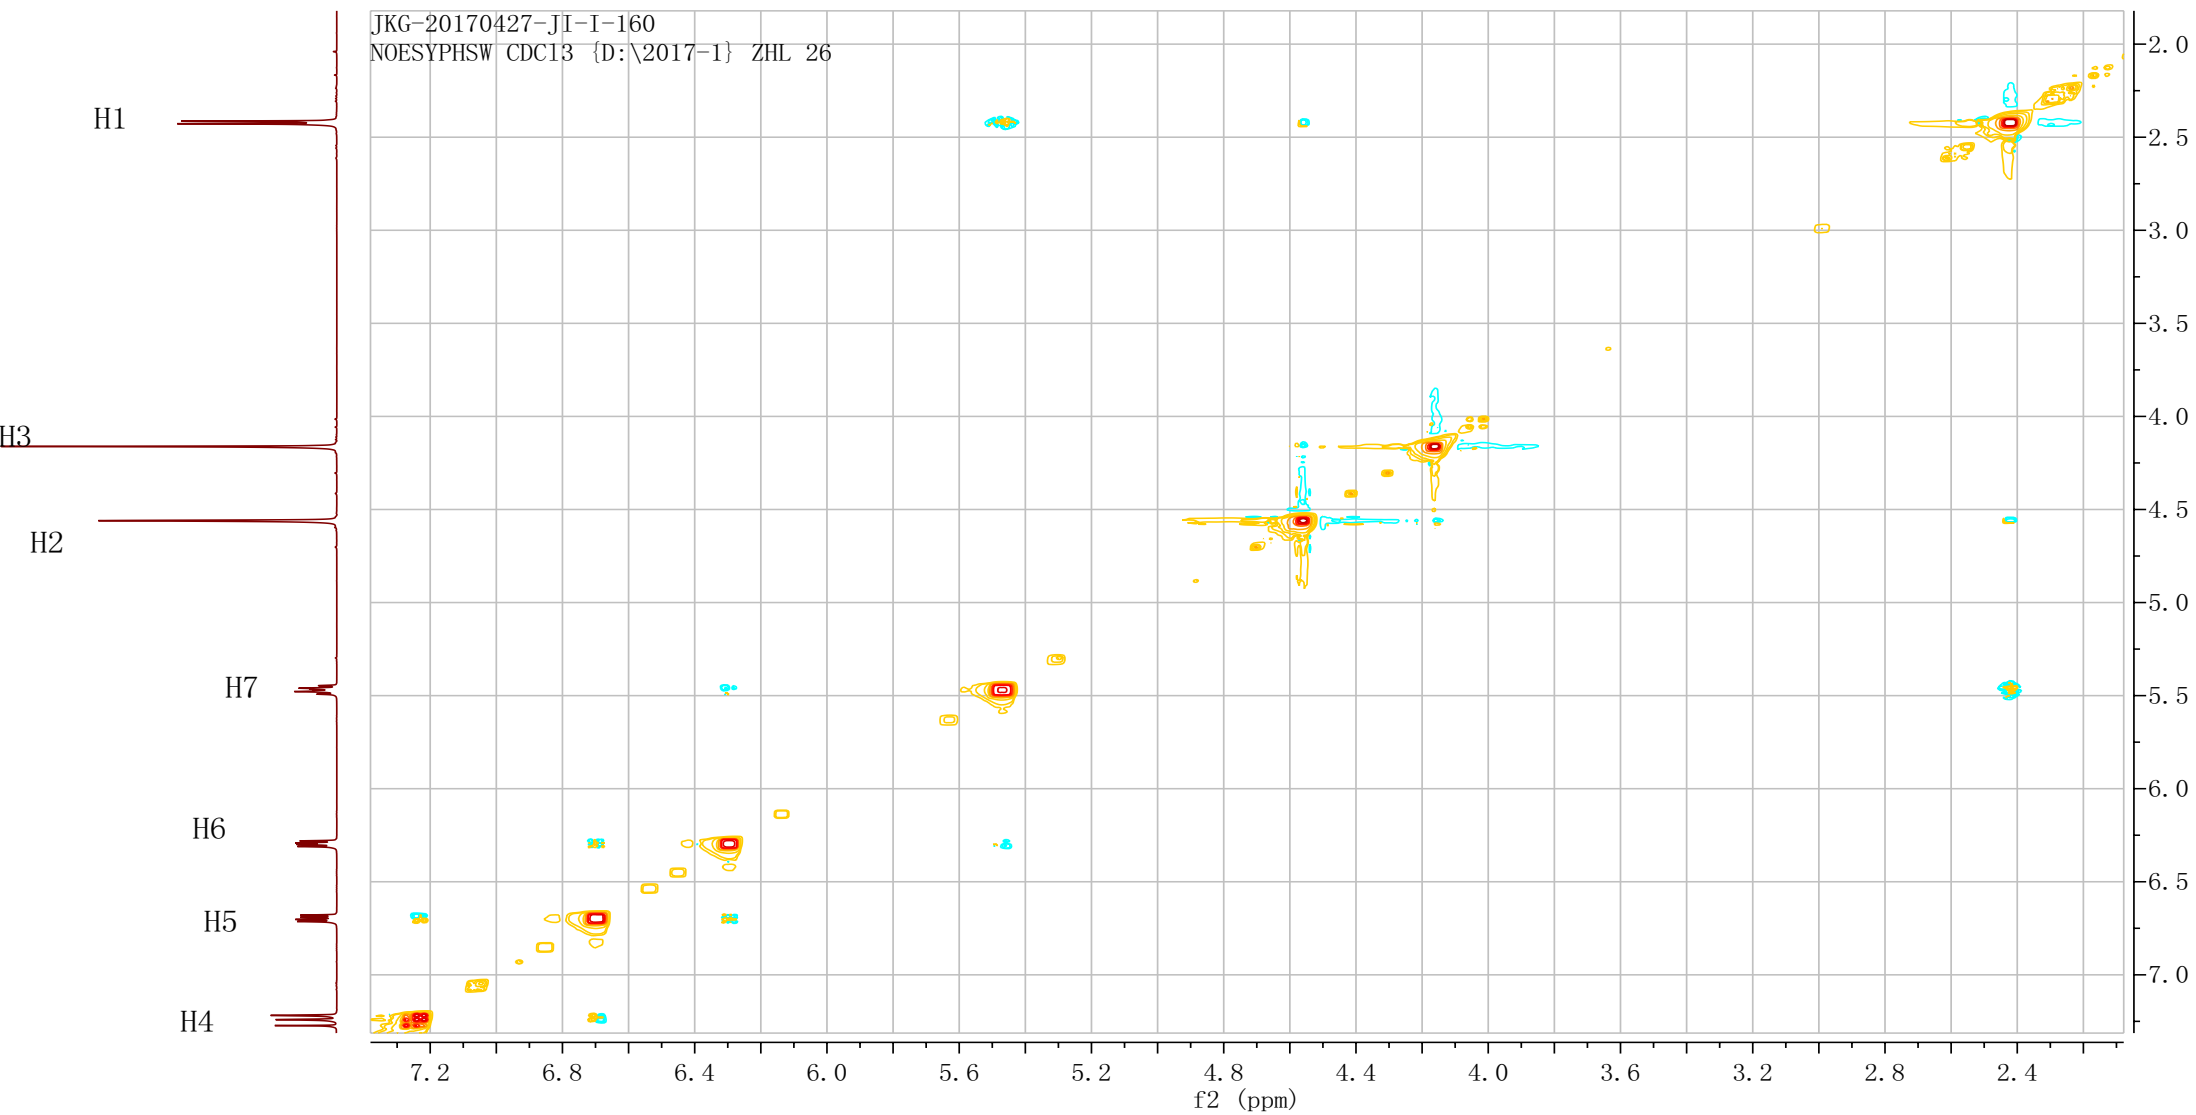



| Parameter                | Value       |
|--------------------------|-------------|
| 1 Title                  | jkg-VI-5a-H |
| 2 Solvent                | CDCl3       |
| 3 Temperature            | 80.0        |
| 4 Relaxation Delay       | 10.0000     |
| 5 Spectrometer Frequency | 499.86      |

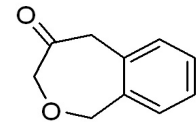

5a

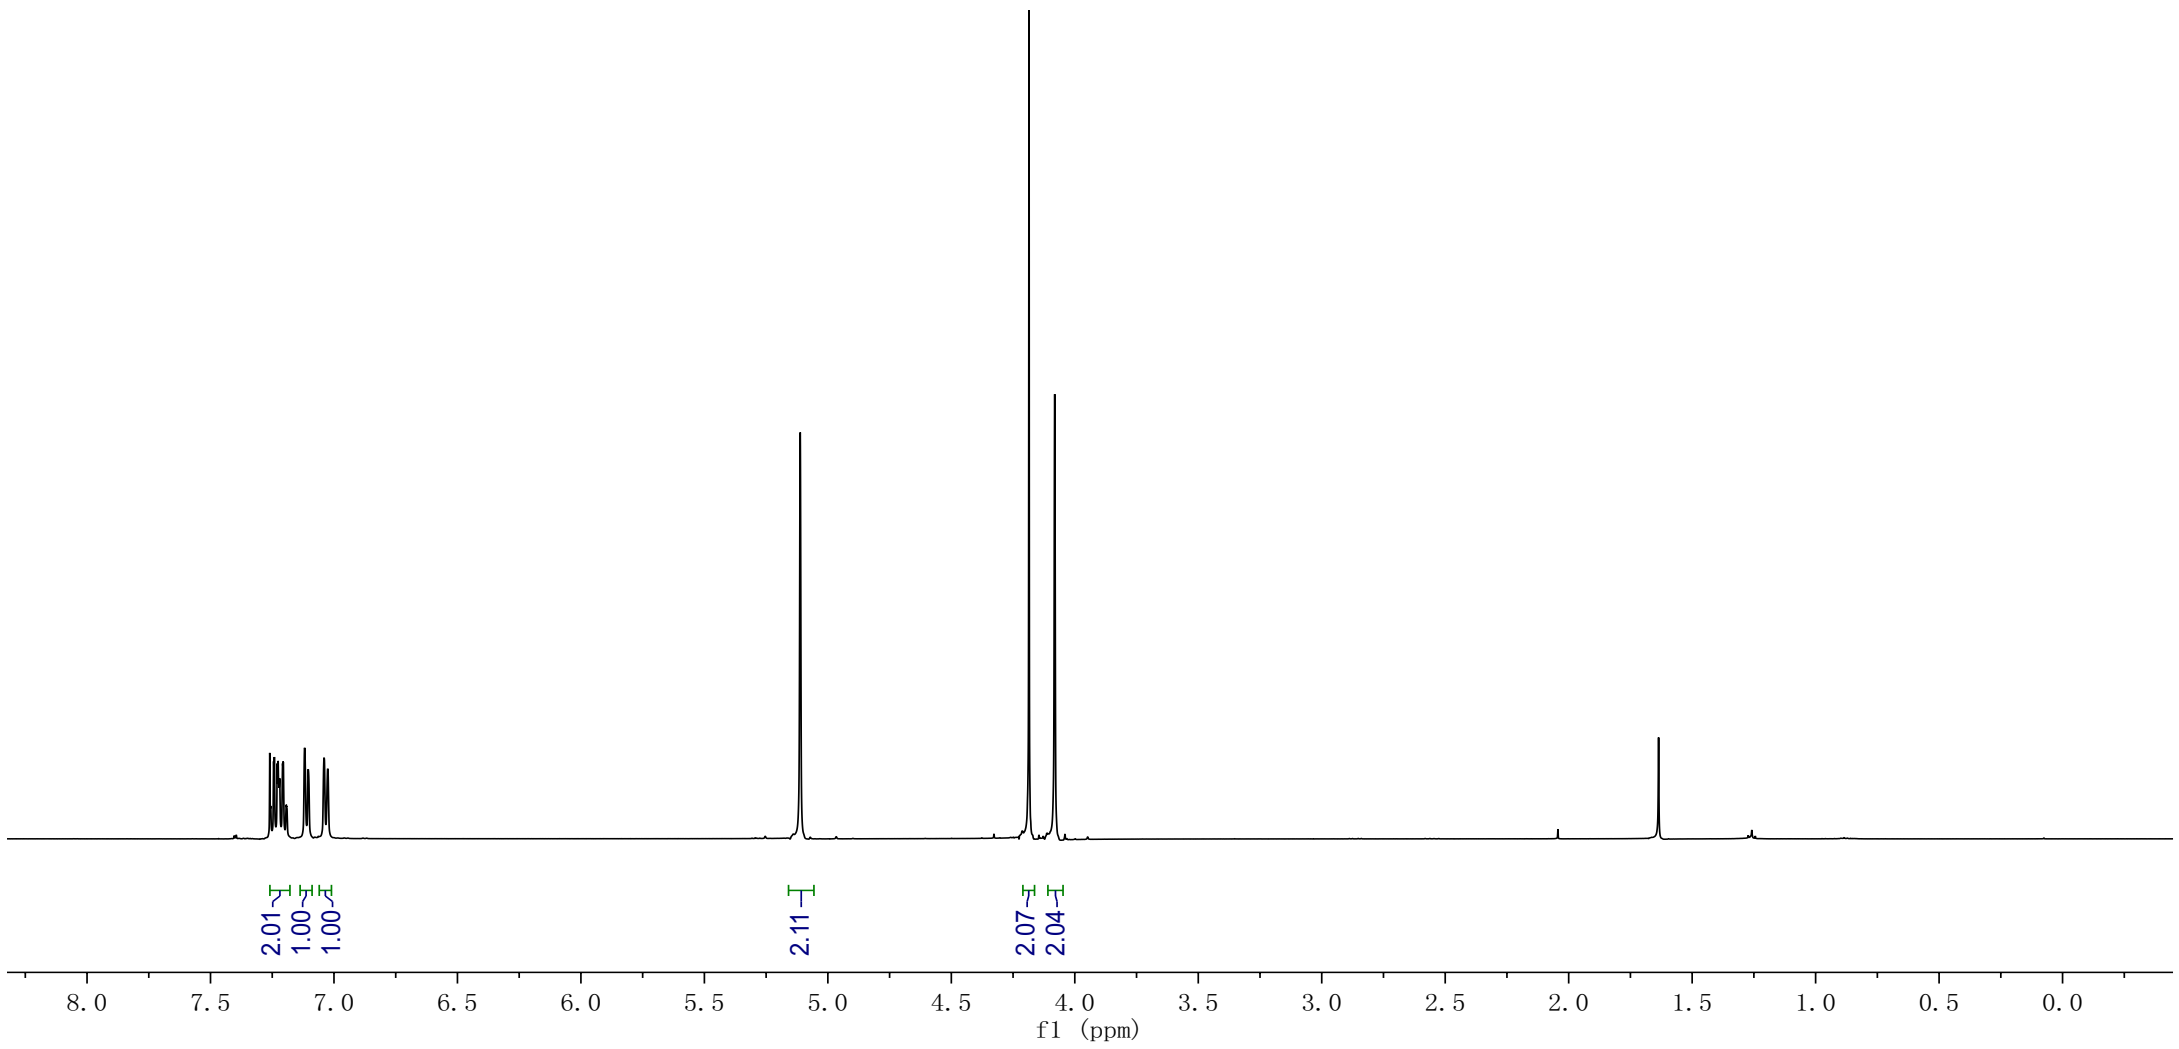

| Parameter                | Value       |
|--------------------------|-------------|
| 1 Title                  | jkg-VI-5a-C |
| 2 Solvent                | CDCl3       |
| 3 Temperature            | 80.0        |
| 4 Relaxation Delay       | 1.0000      |
| 5 Spectrometer Frequency | 125.70      |

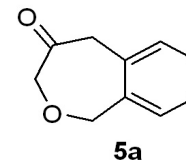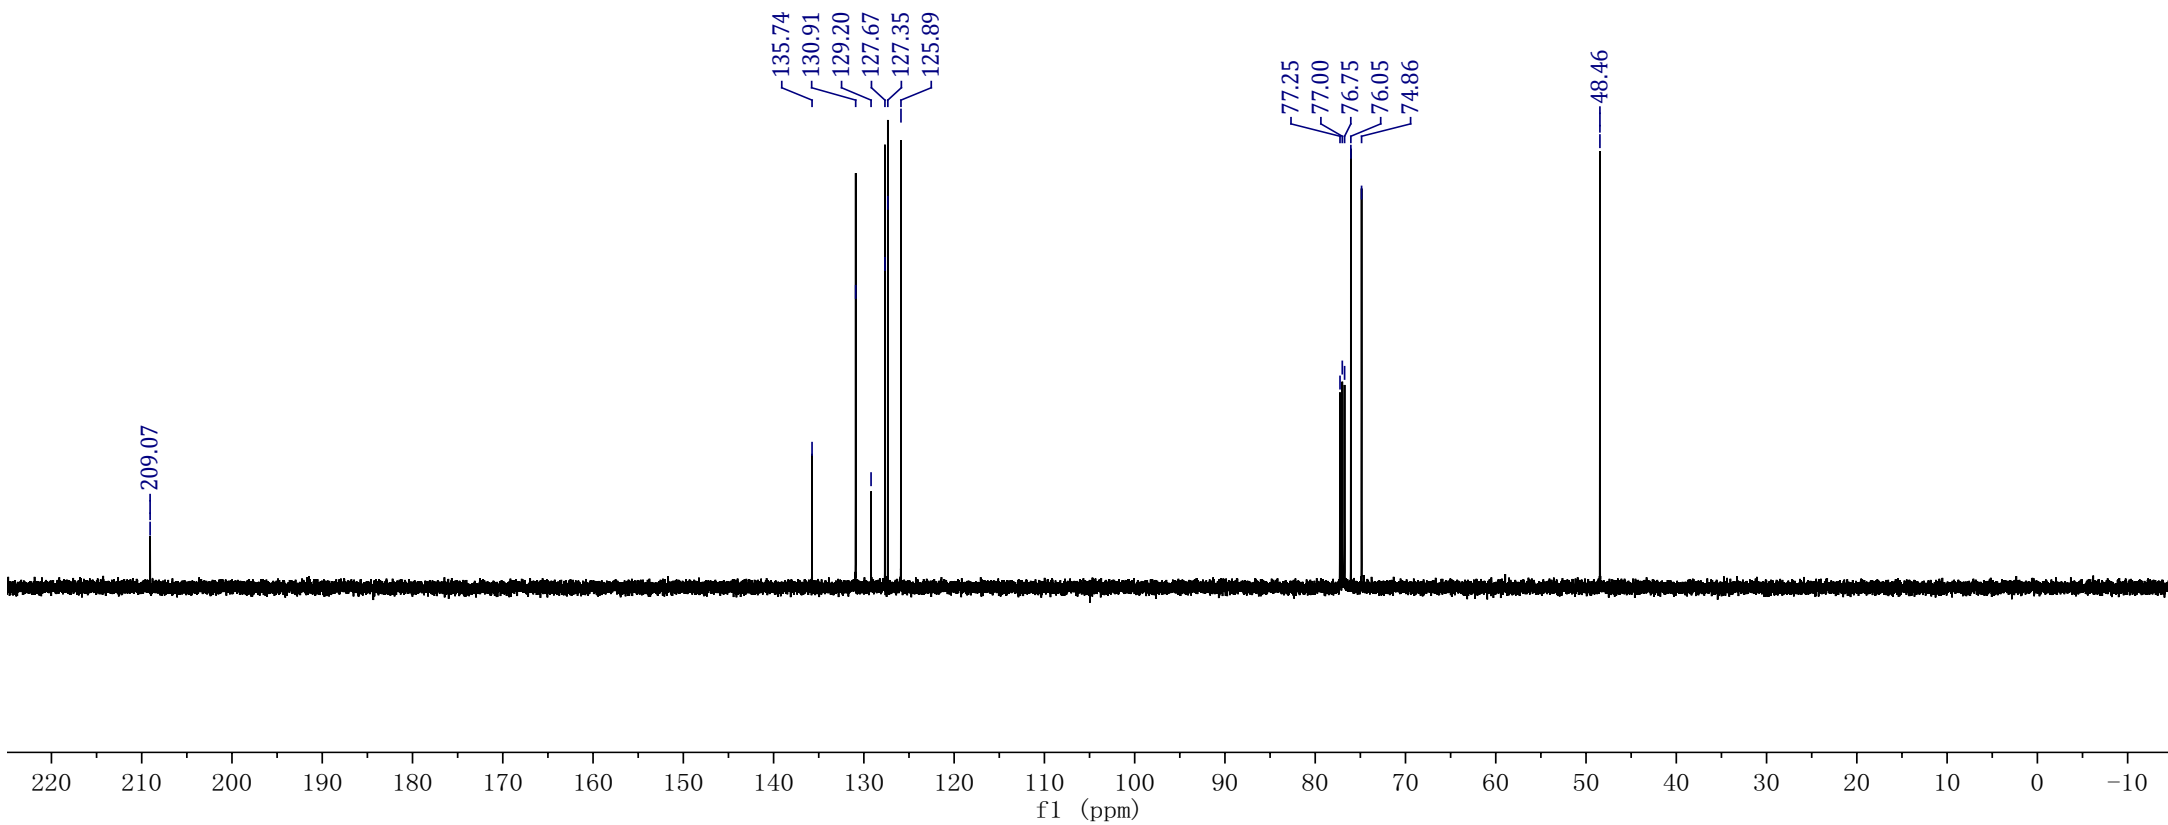

| Parameter              | Value       |
|------------------------|-------------|
| Title                  | jkg-VI-6A-H |
| Solvent                | cdcl3       |
| Spectrometer Frequency | 599.64      |
| Nucleus                | 1H          |

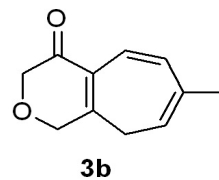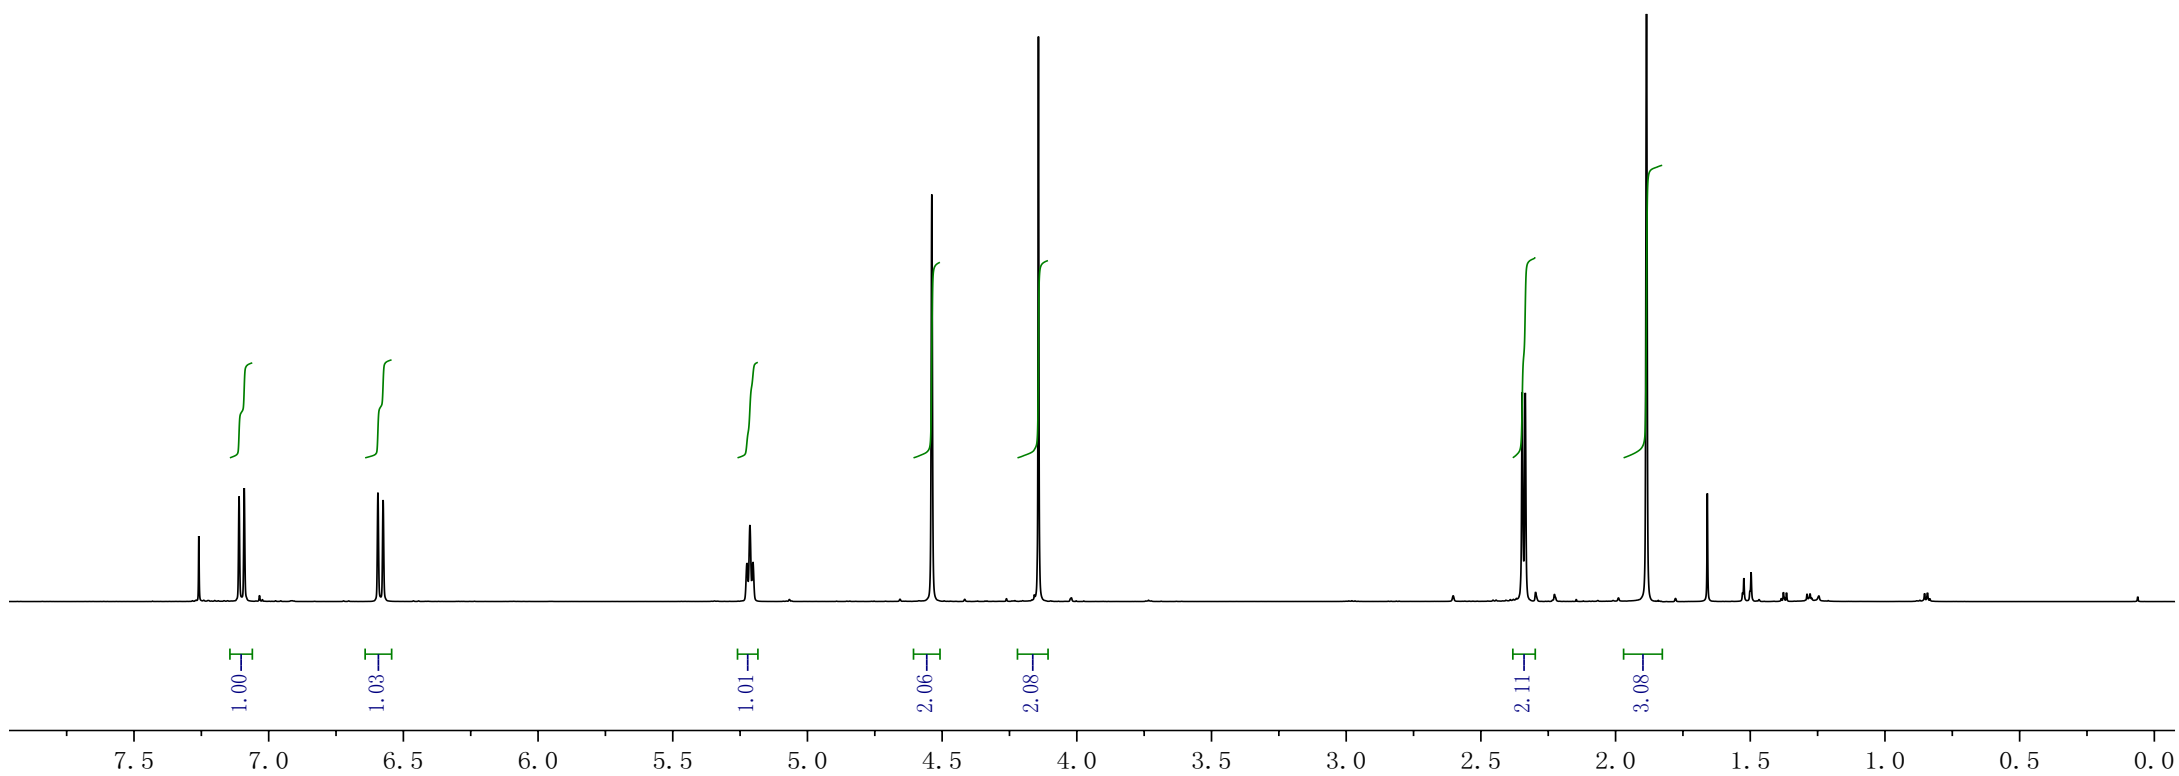

| Parameter              | Value           |
|------------------------|-----------------|
| Title                  | jkg-VI-6A-C1    |
| Solvent                | cdcl3           |
| Spectrometer Frequency | 150.79          |
| Nucleus                | <sup>13</sup> C |

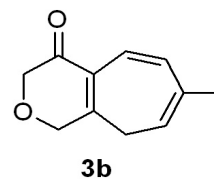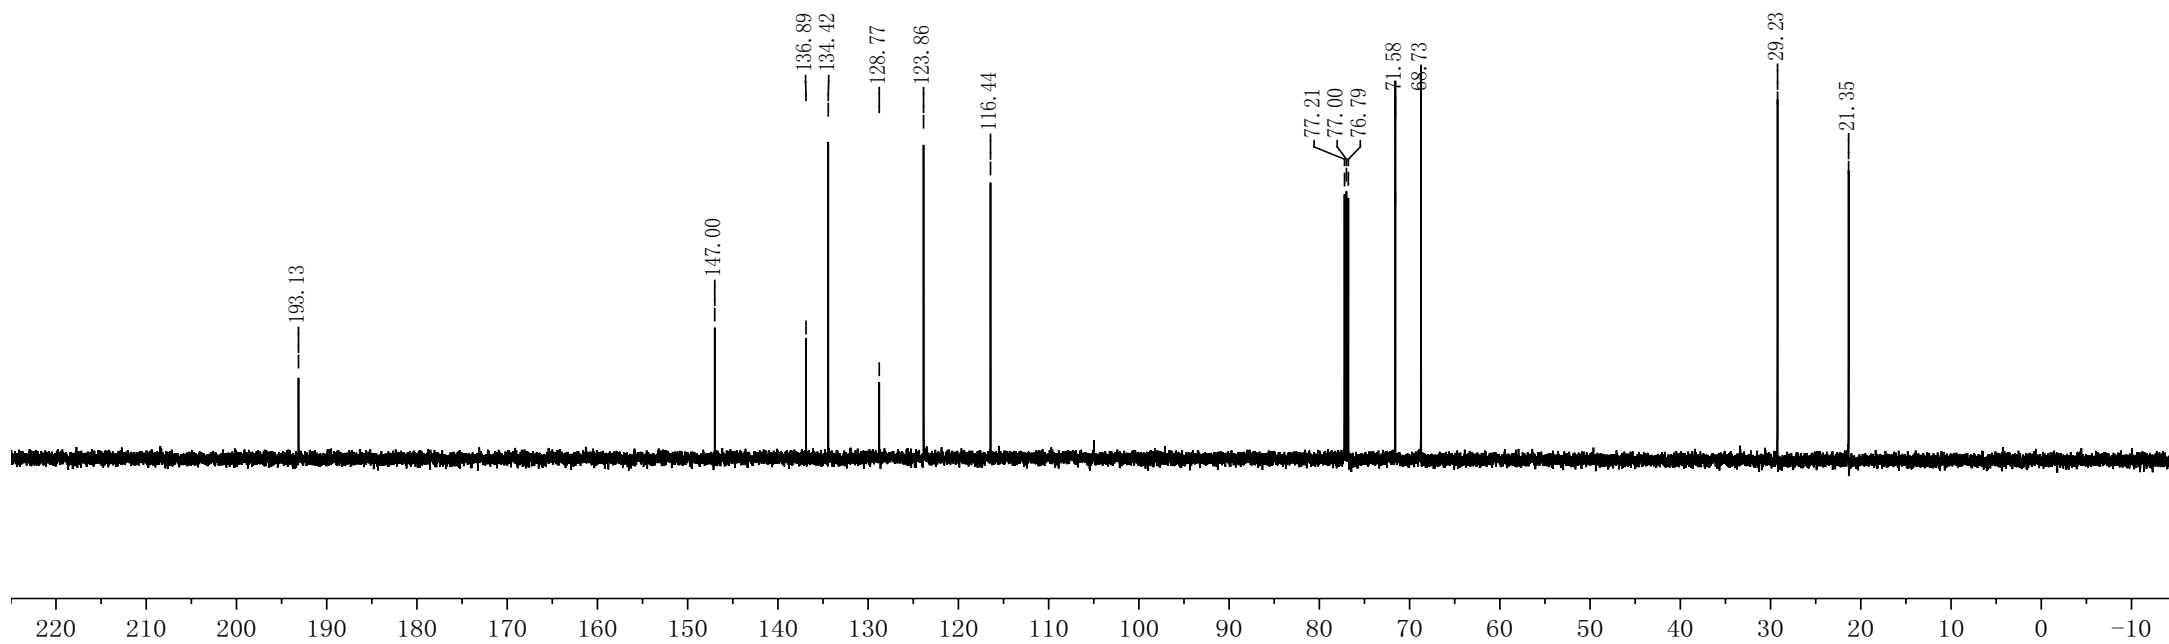

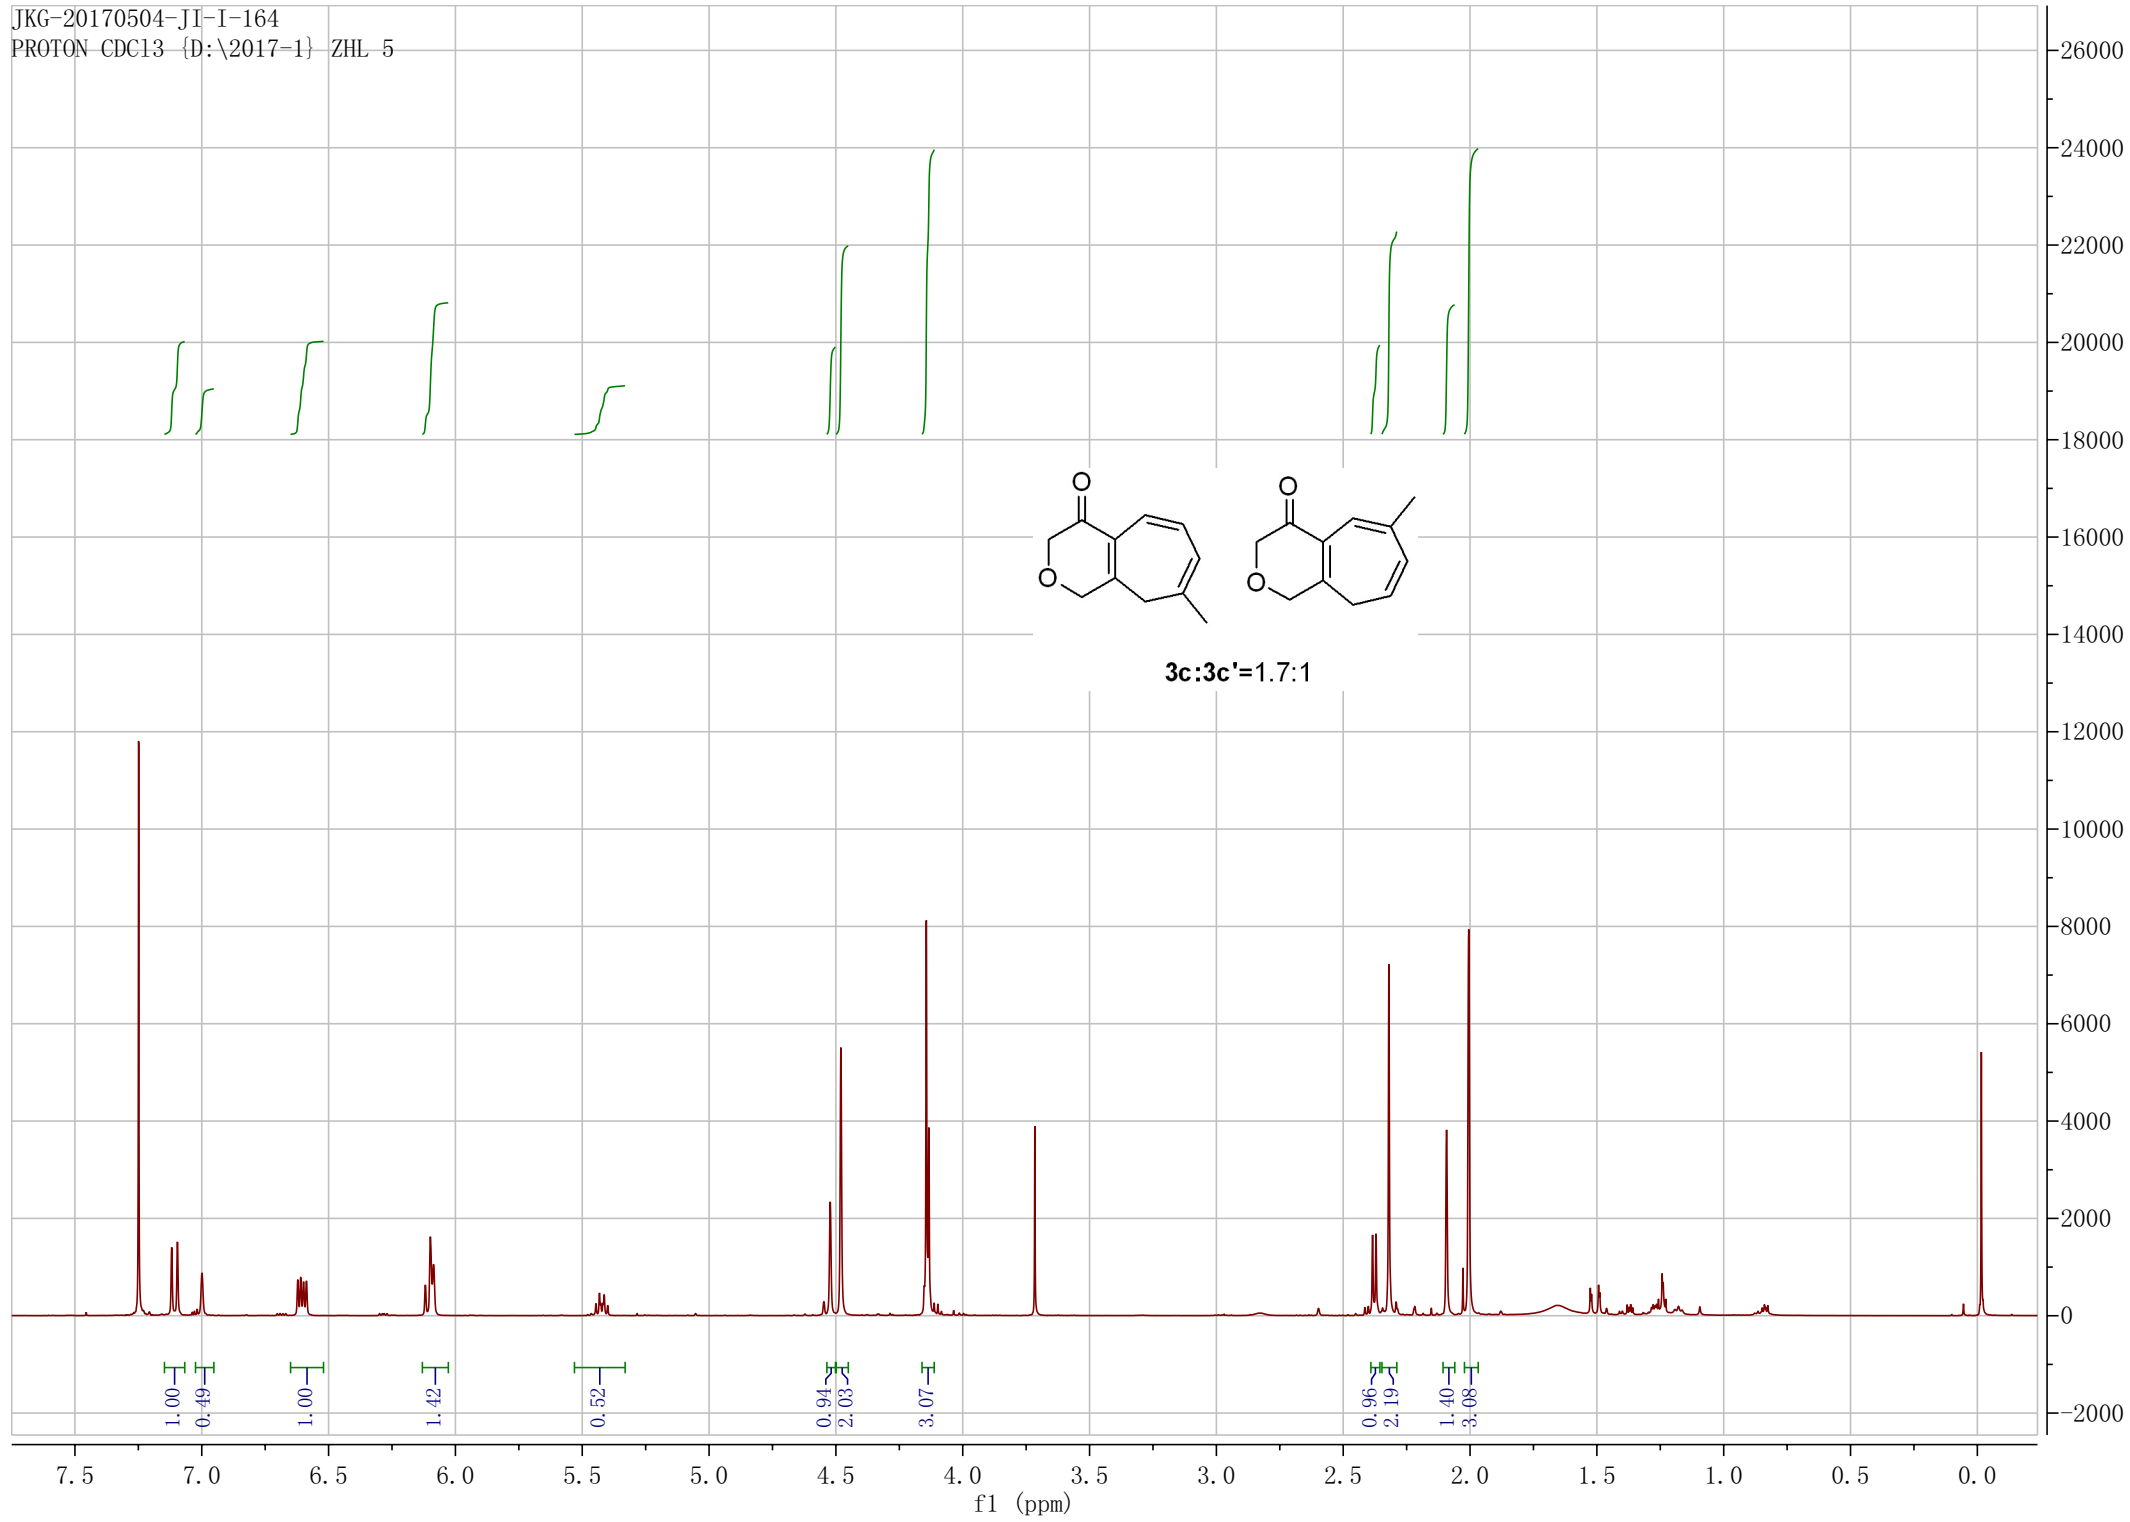

JKG-20170504-JI-164  
C13CPD CDC13 {DMSO-d6-17-1} ZHL 5

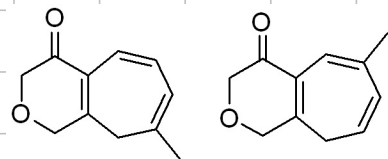

**3c:3c'=1.7:1**

143.62  
142.77  
140.36  
131.87  
131.17  
130.73  
129.17  
128.95  
123.97  
122.84  
121.71  
119.06

71.68  
71.48  
69.18  
68.91

35.28  
29.42  
24.69  
24.33

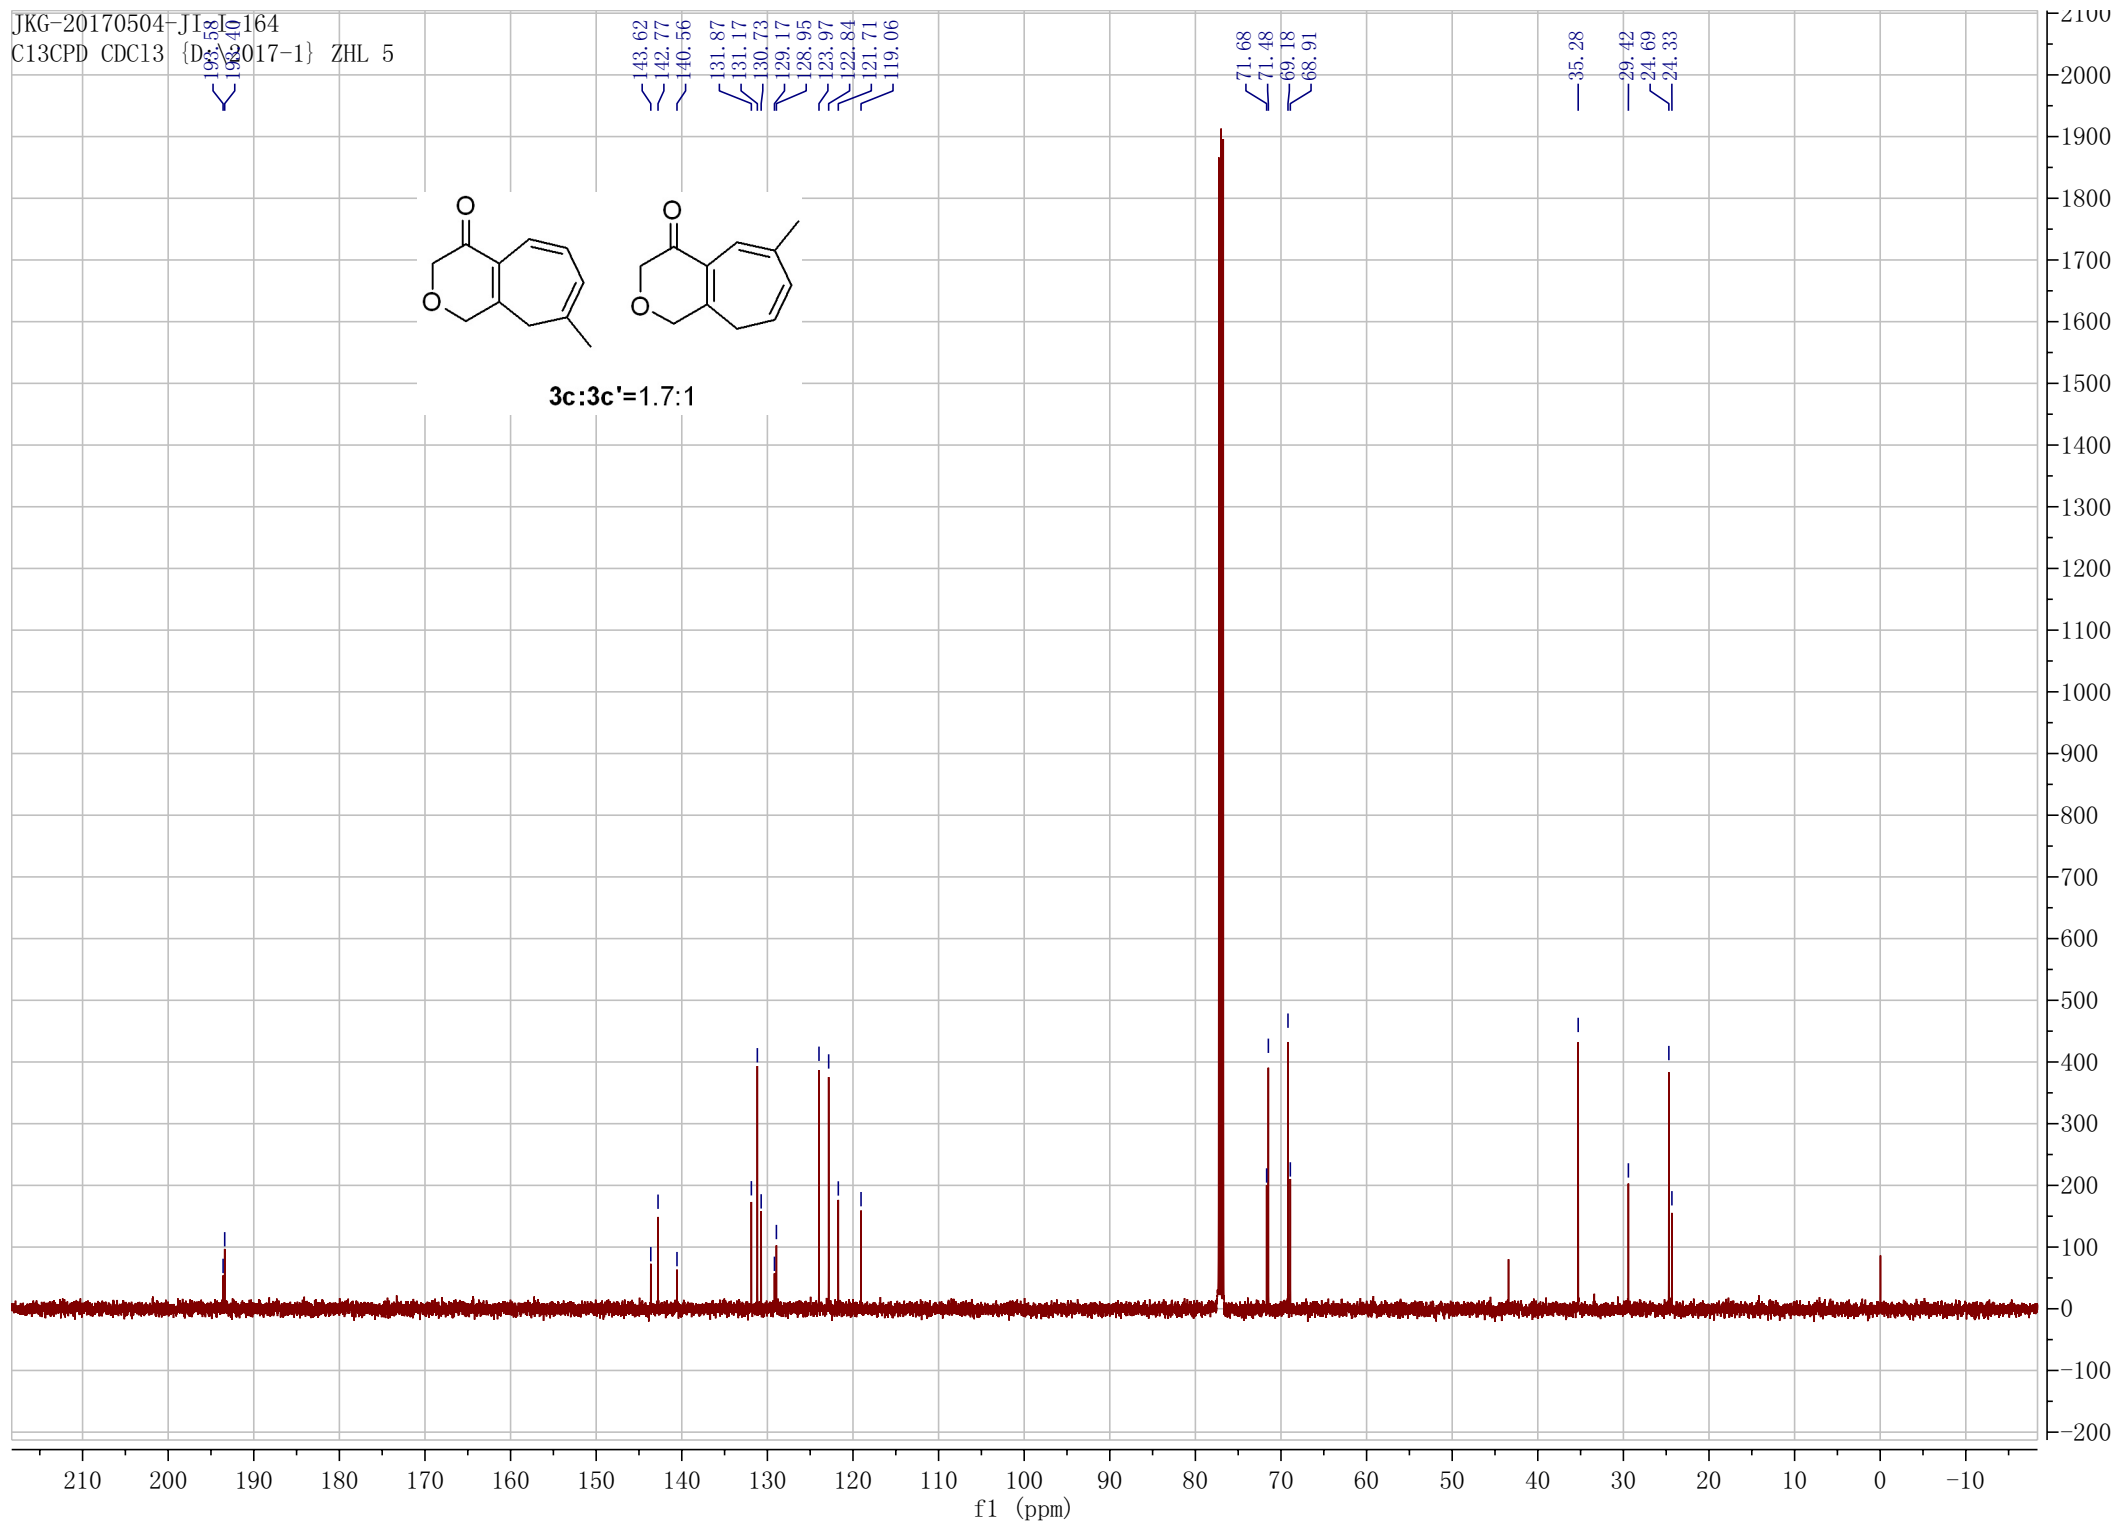

Parameter Value  
Title jkg-V-9a-H  
Solvent CDCl3  
Spectrometer Frequency 499.86  
Nucleus 1H

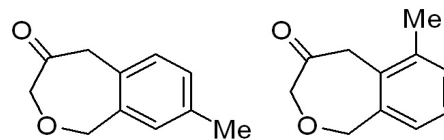

5c:5c'=3.8:1

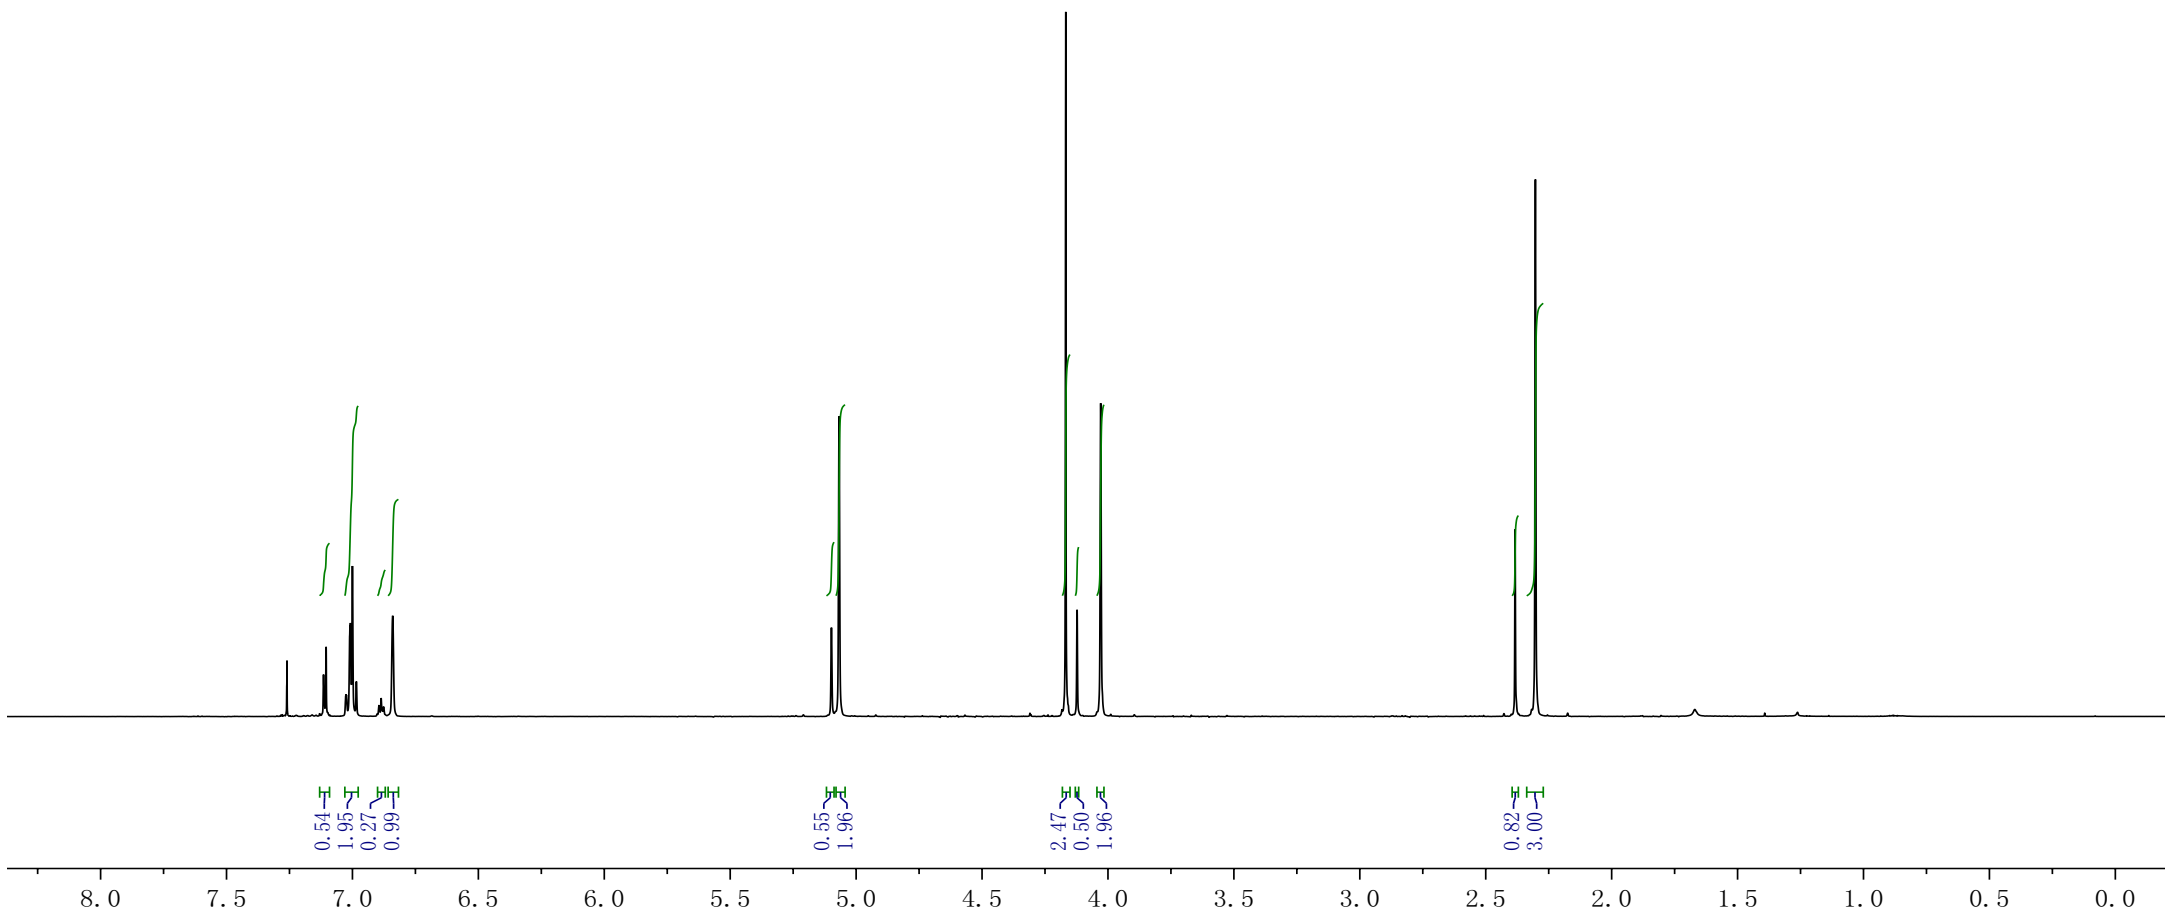

| Parameter              | Value             |
|------------------------|-------------------|
| Title                  | jkg-V-9a-C        |
| Solvent                | CDCl <sub>3</sub> |
| Spectrometer Frequency | 125.70            |
| Nucleus                | <sup>13</sup> C   |

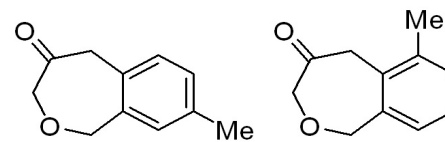

**5c:5c'=3.8:1**

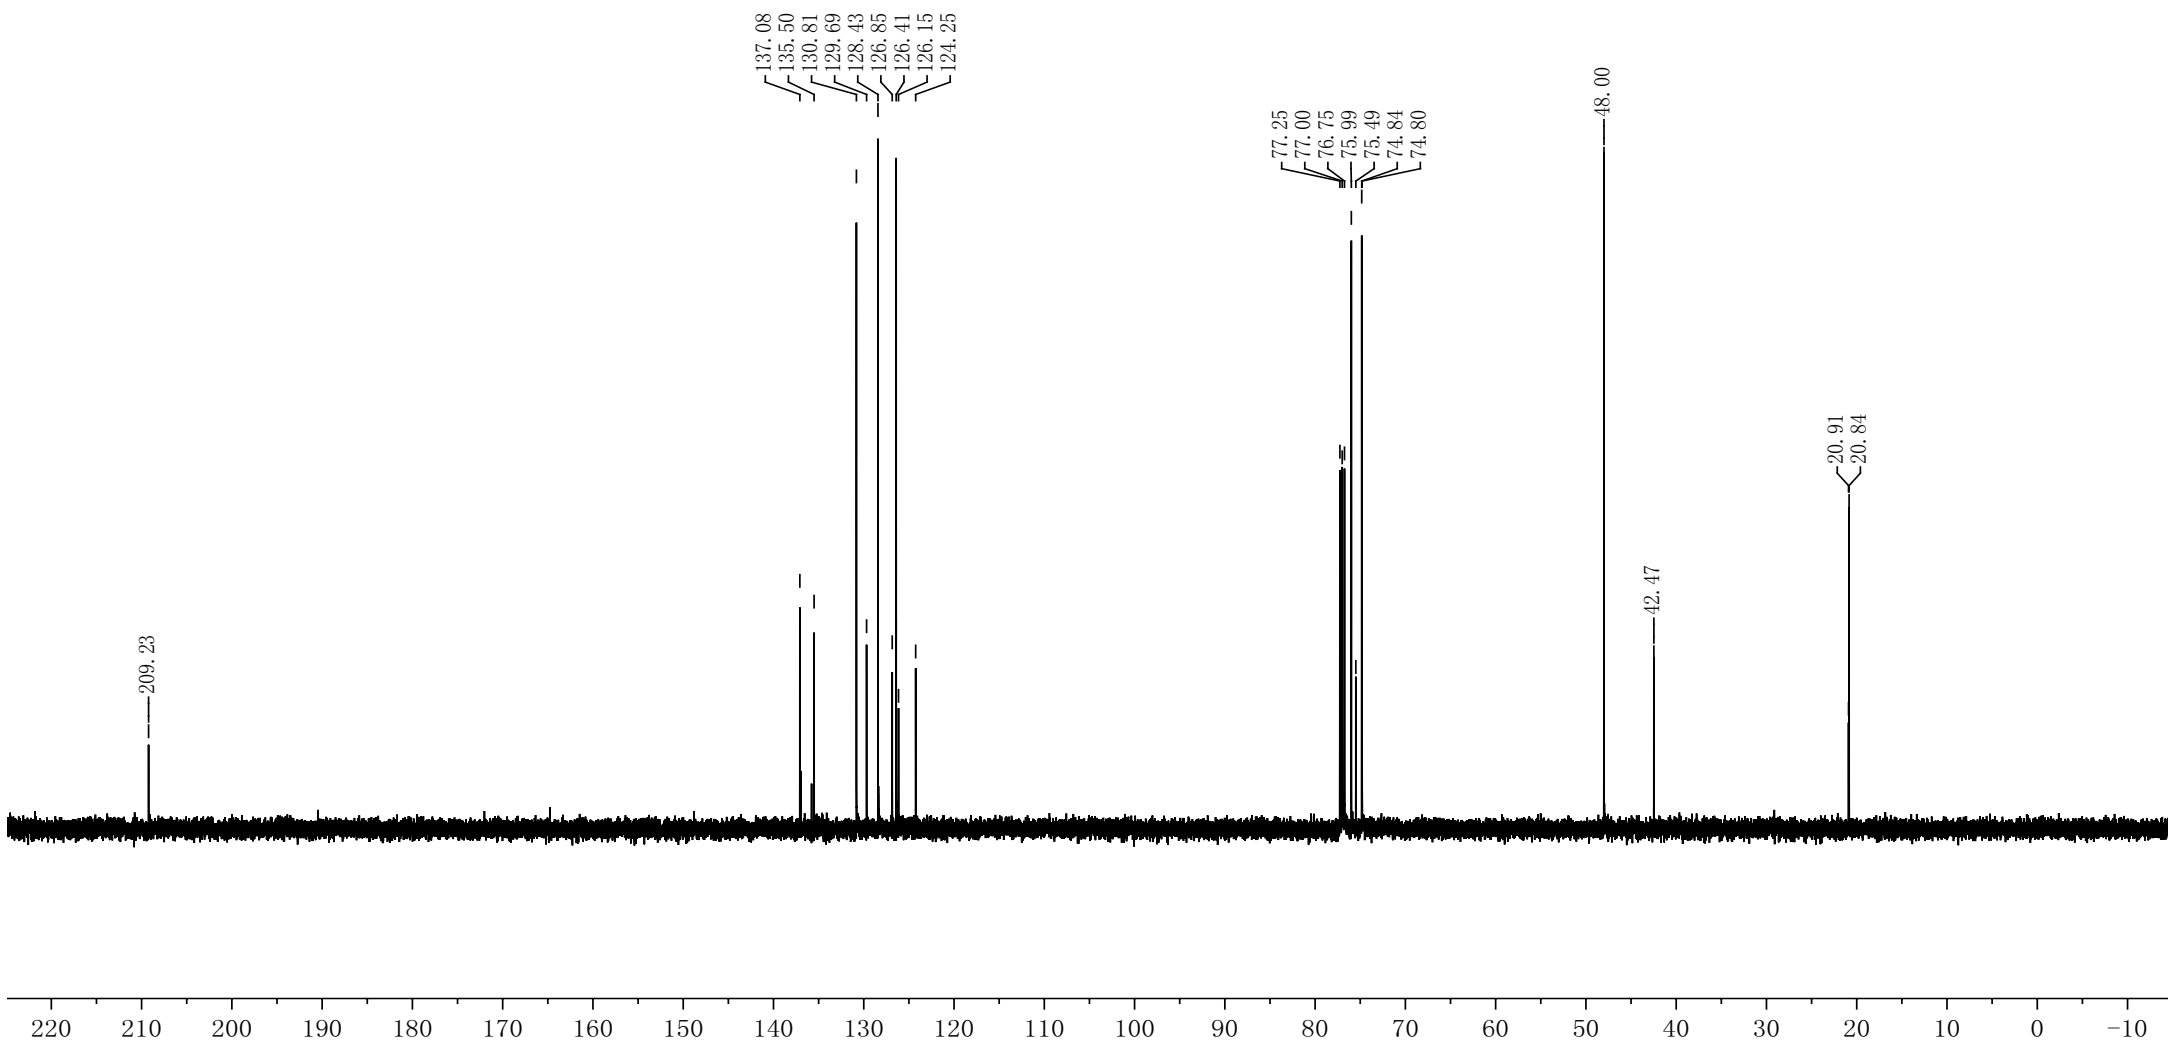



| Parameter              | Value       |
|------------------------|-------------|
| Title                  | jkg-VI-8B-H |
| Solvent                | cdcl3       |
| Spectrometer Frequency | 599.64      |
| Nucleus                | 1H          |

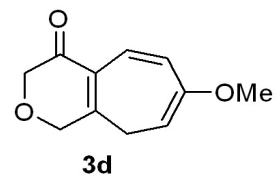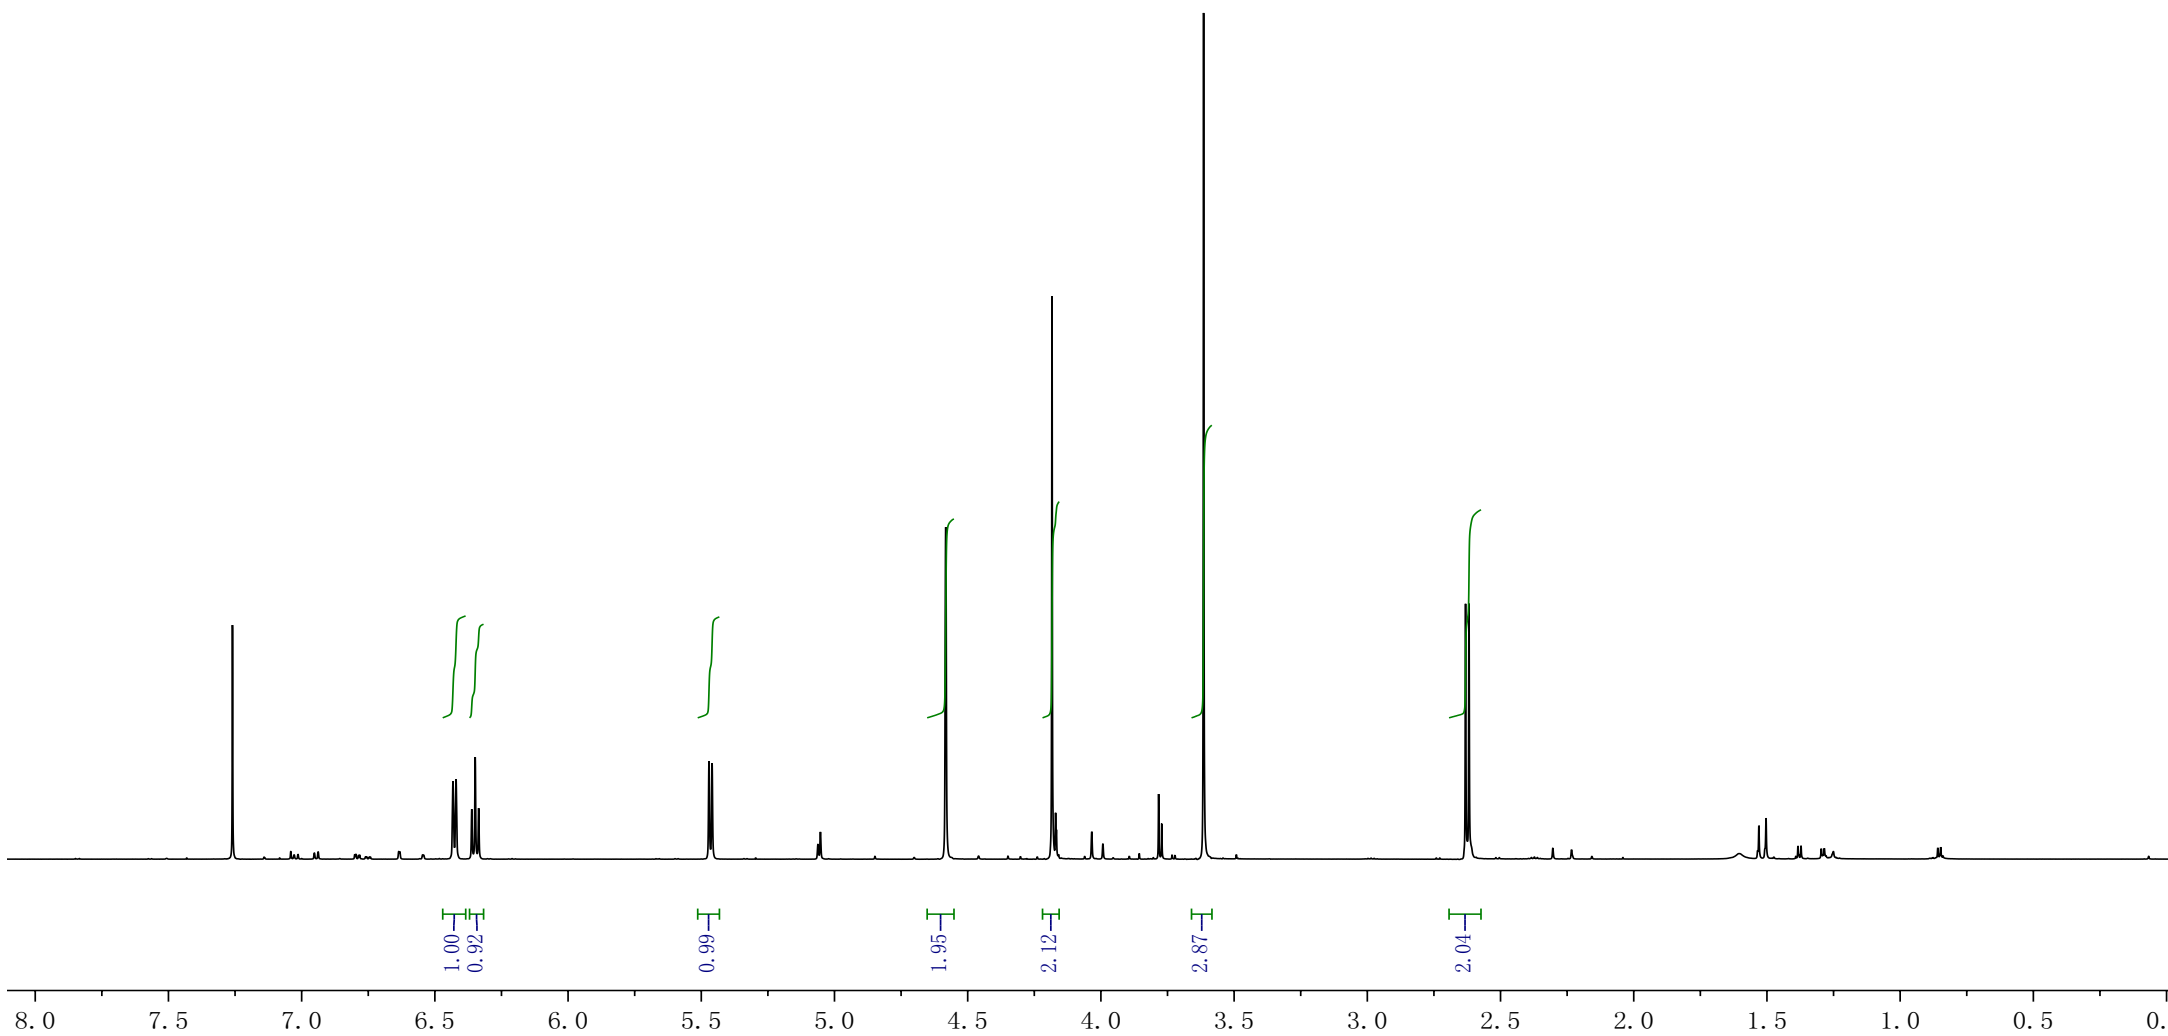

| Parameter              | Value           |
|------------------------|-----------------|
| Title                  | jkg-VI-8B-C     |
| Solvent                | cdcl3           |
| Spectrometer Frequency | 150.79          |
| Nucleus                | <sup>13</sup> C |

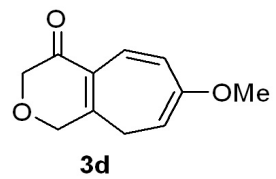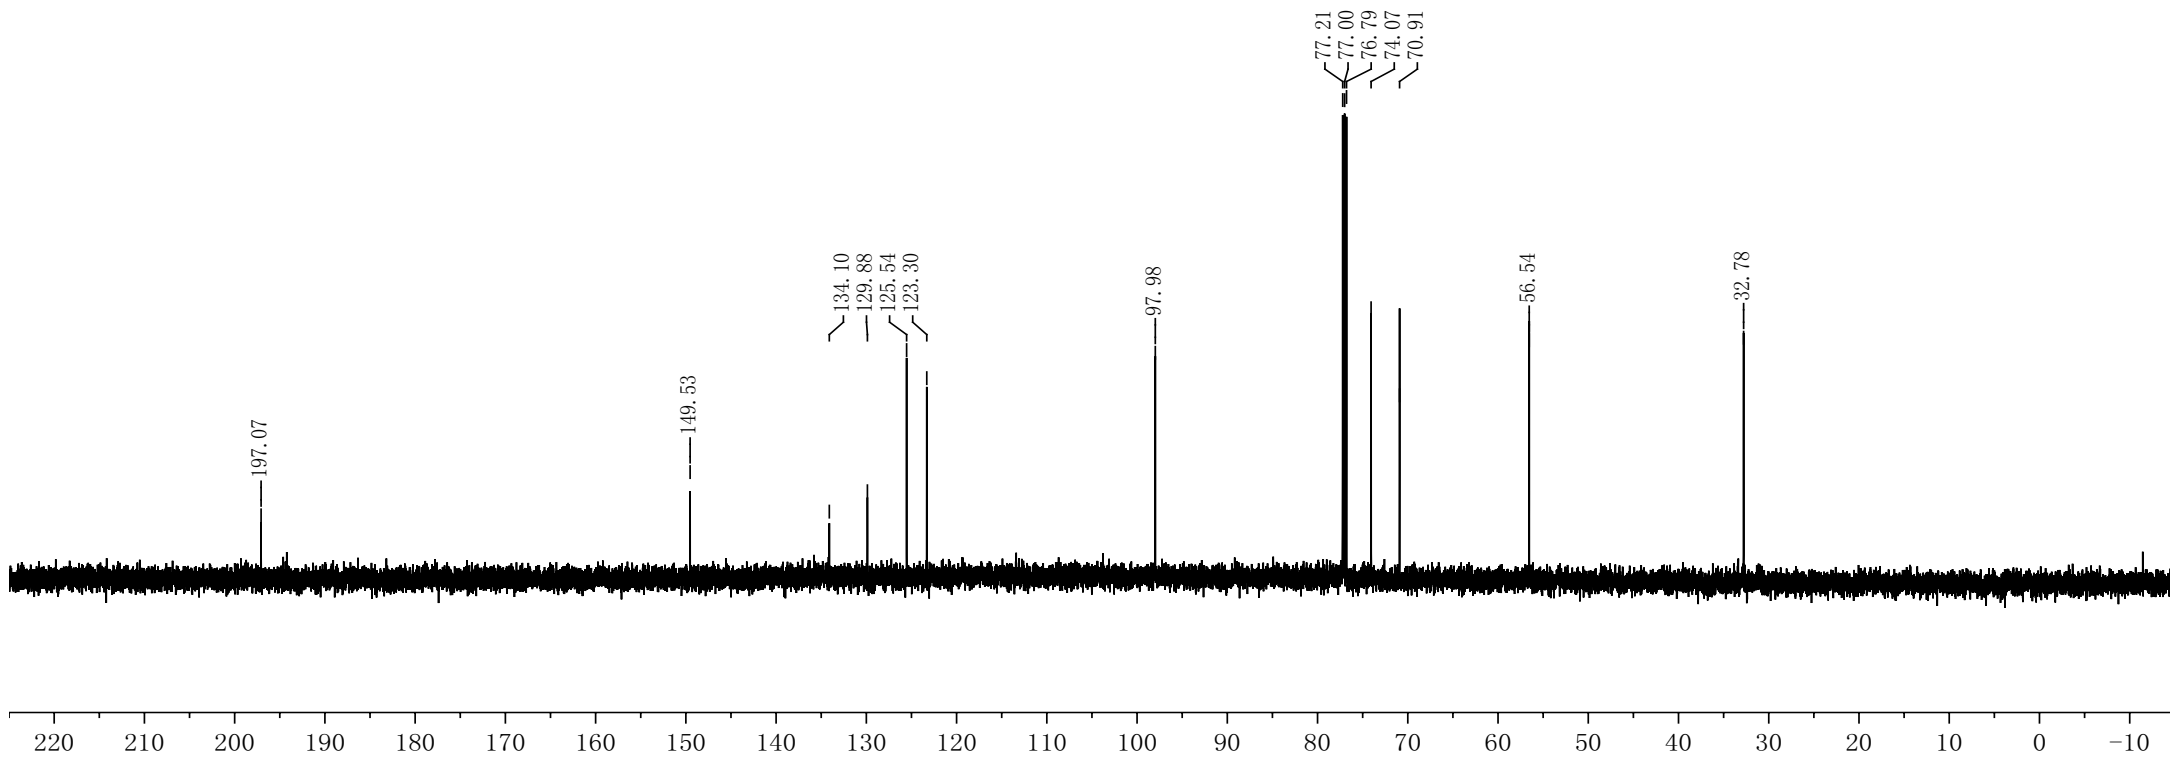

| Parameter                | Value        |
|--------------------------|--------------|
| 1 Title                  | jkg-Vi-12C-H |
| 2 Solvent                | CDCl3        |
| 3 Temperature            | 25.0         |
| 4 Relaxation Delay       | 10.0000      |
| 5 Spectrometer Frequency | 499.86       |

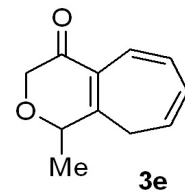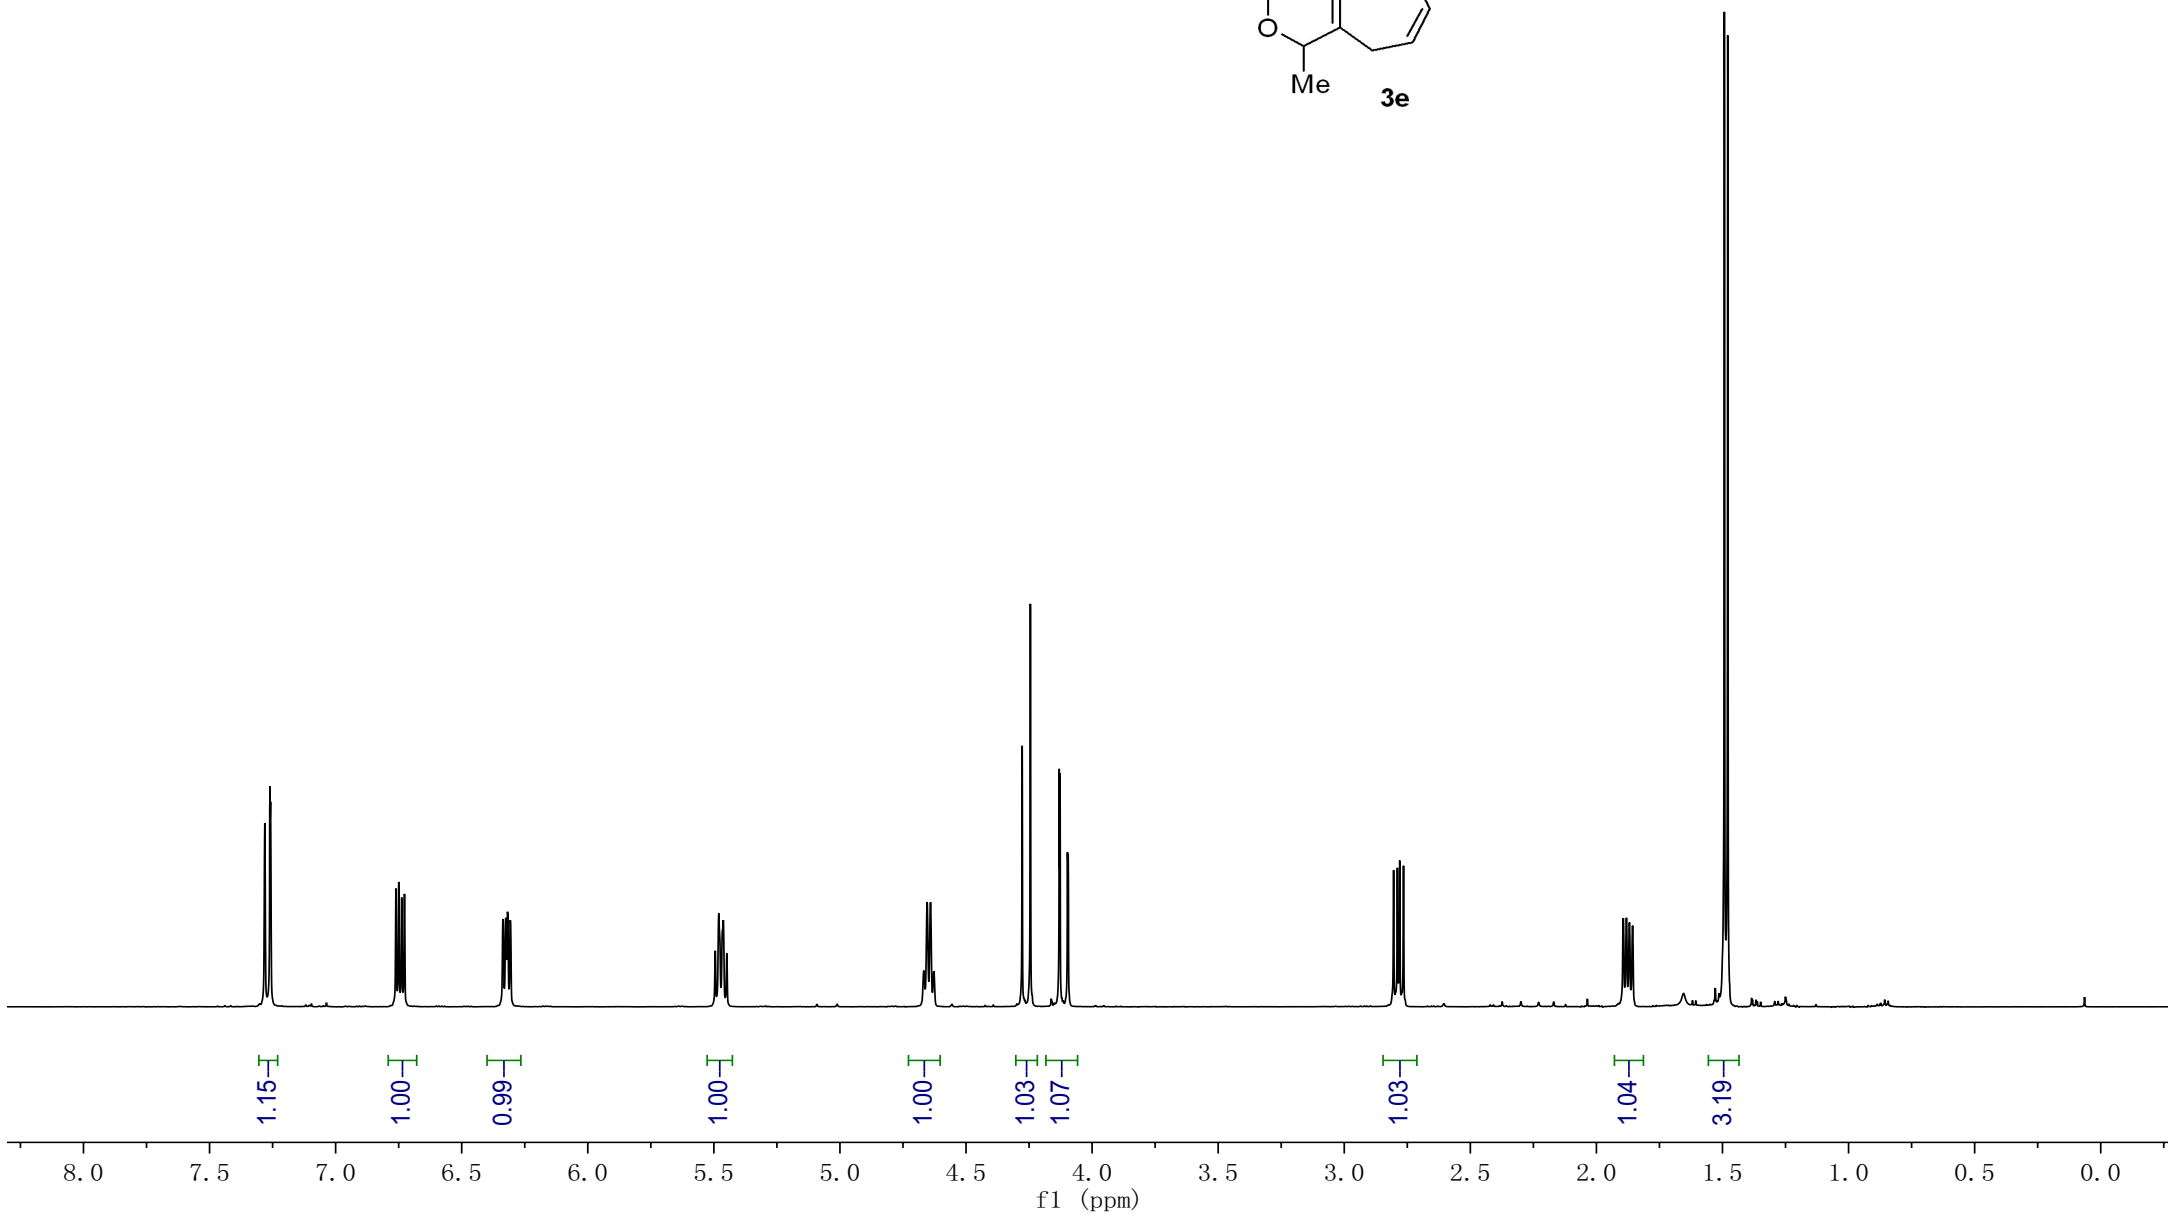

| Parameter                | Value        |
|--------------------------|--------------|
| 1 Title                  | jkg-VI-12C-C |
| 2 Solvent                | CDCl3        |
| 3 Temperature            | 25.0         |
| 4 Relaxation Delay       | 1.0000       |
| 5 Spectrometer Frequency | 125.70       |

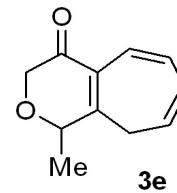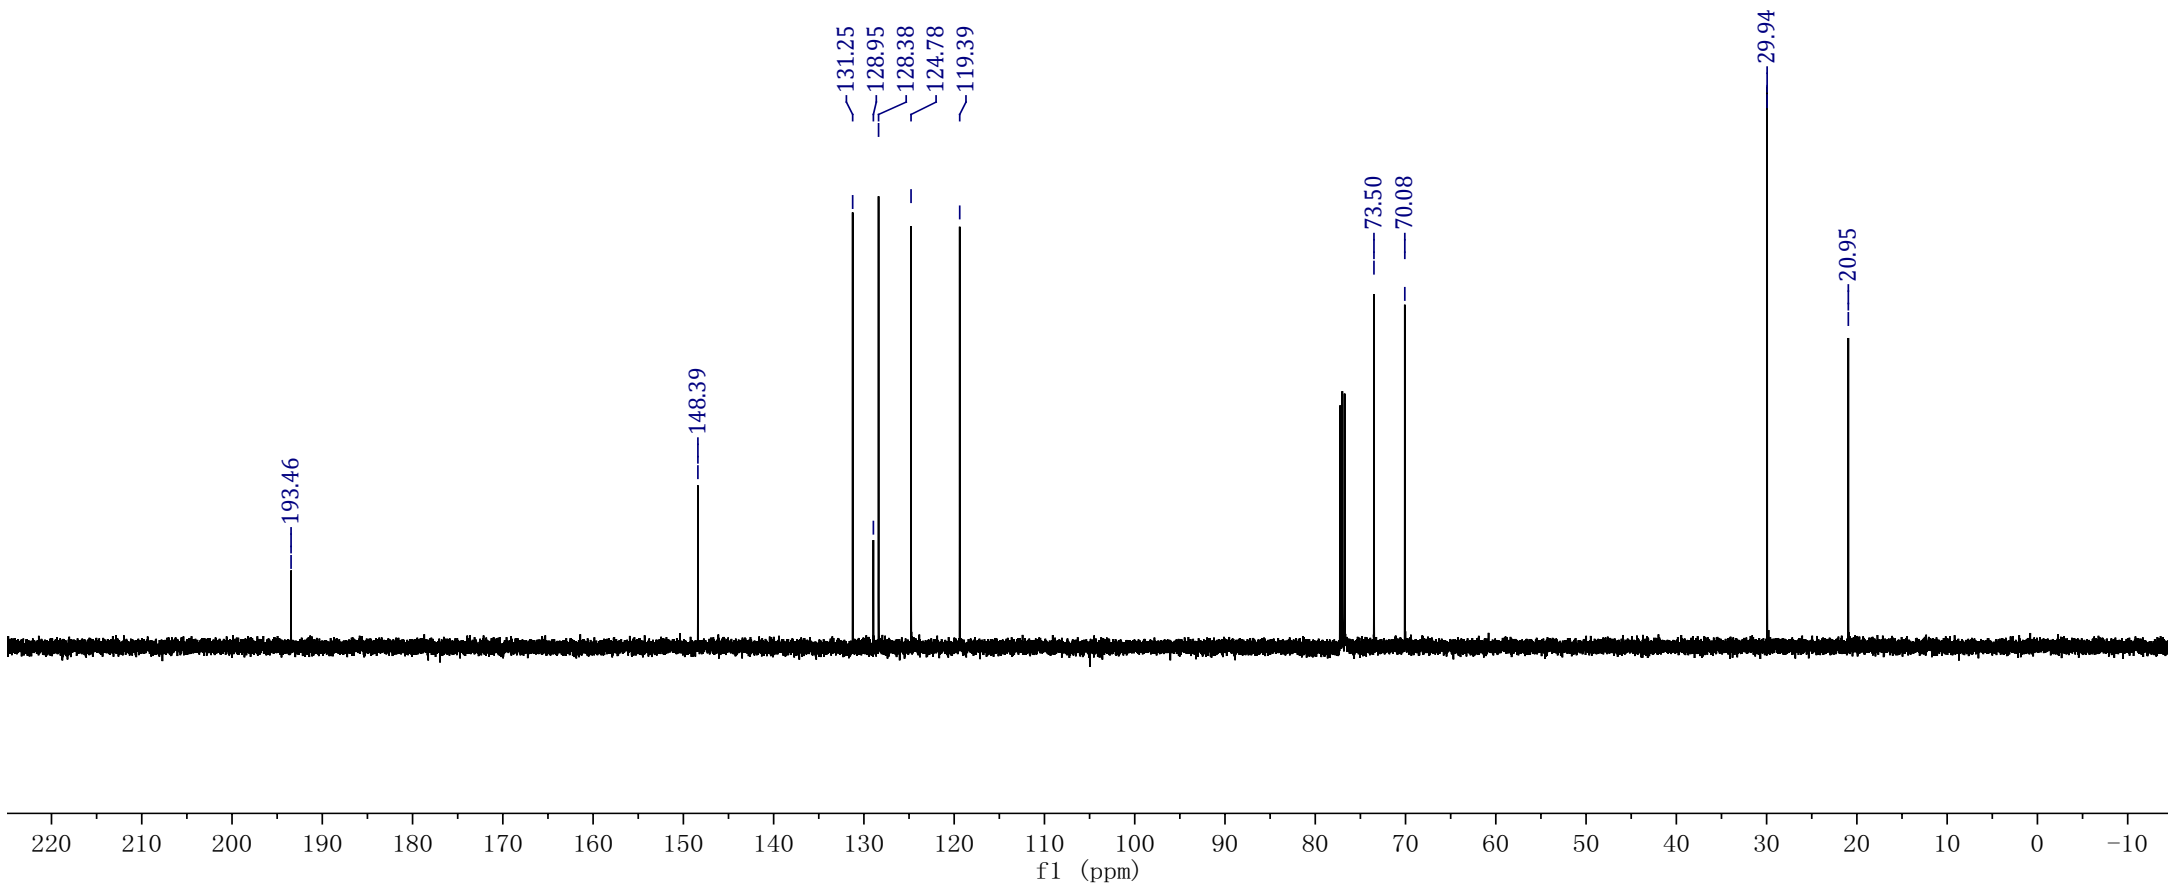

| Parameter                | Value        |
|--------------------------|--------------|
| 1 Title                  | jkg-VI-23A-H |
| 2 Solvent                | CDCl3        |
| 3 Temperature            | 25.0         |
| 4 Relaxation Delay       | 10.0000      |
| 5 Spectrometer Frequency | 499.86       |

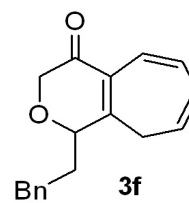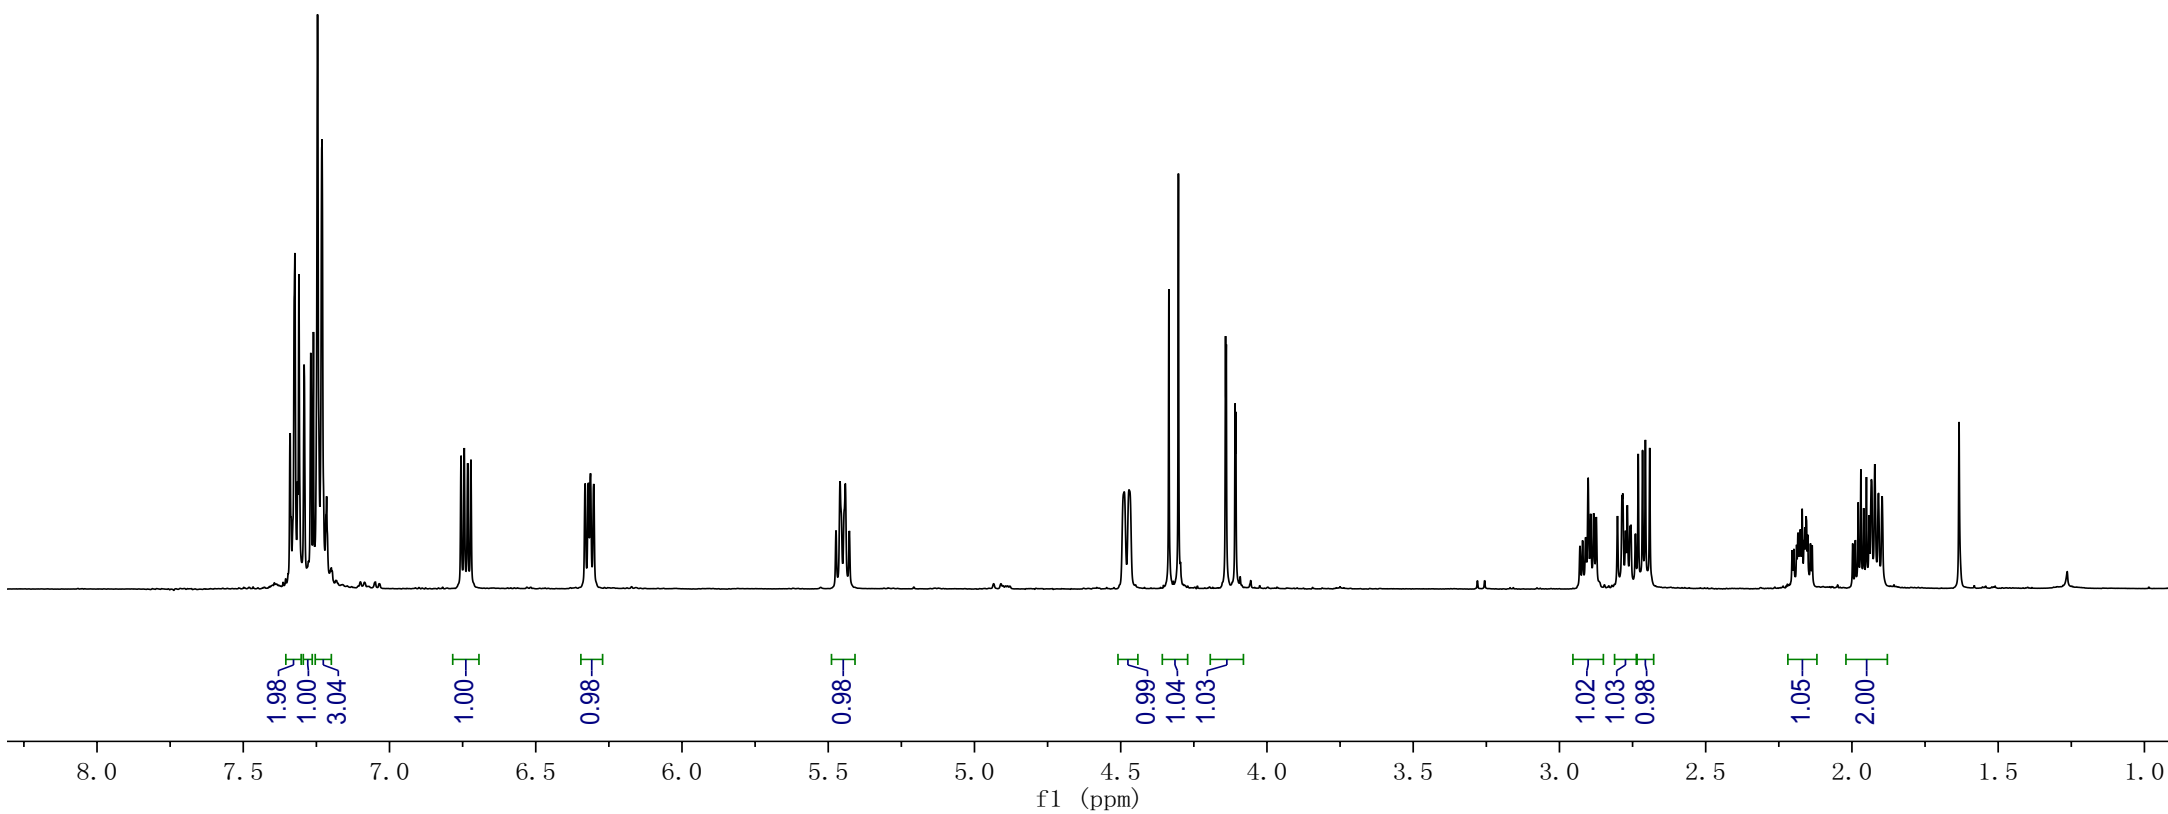

| Parameter                | Value        |
|--------------------------|--------------|
| 1 Title                  | jkg-VI-23A-C |
| 2 Solvent                | CDCl3        |
| 3 Temperature            | 25.0         |
| 4 Relaxation Delay       | 1.0000       |
| 5 Spectrometer Frequency | 125.70       |

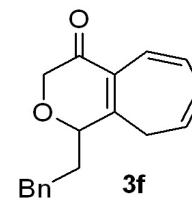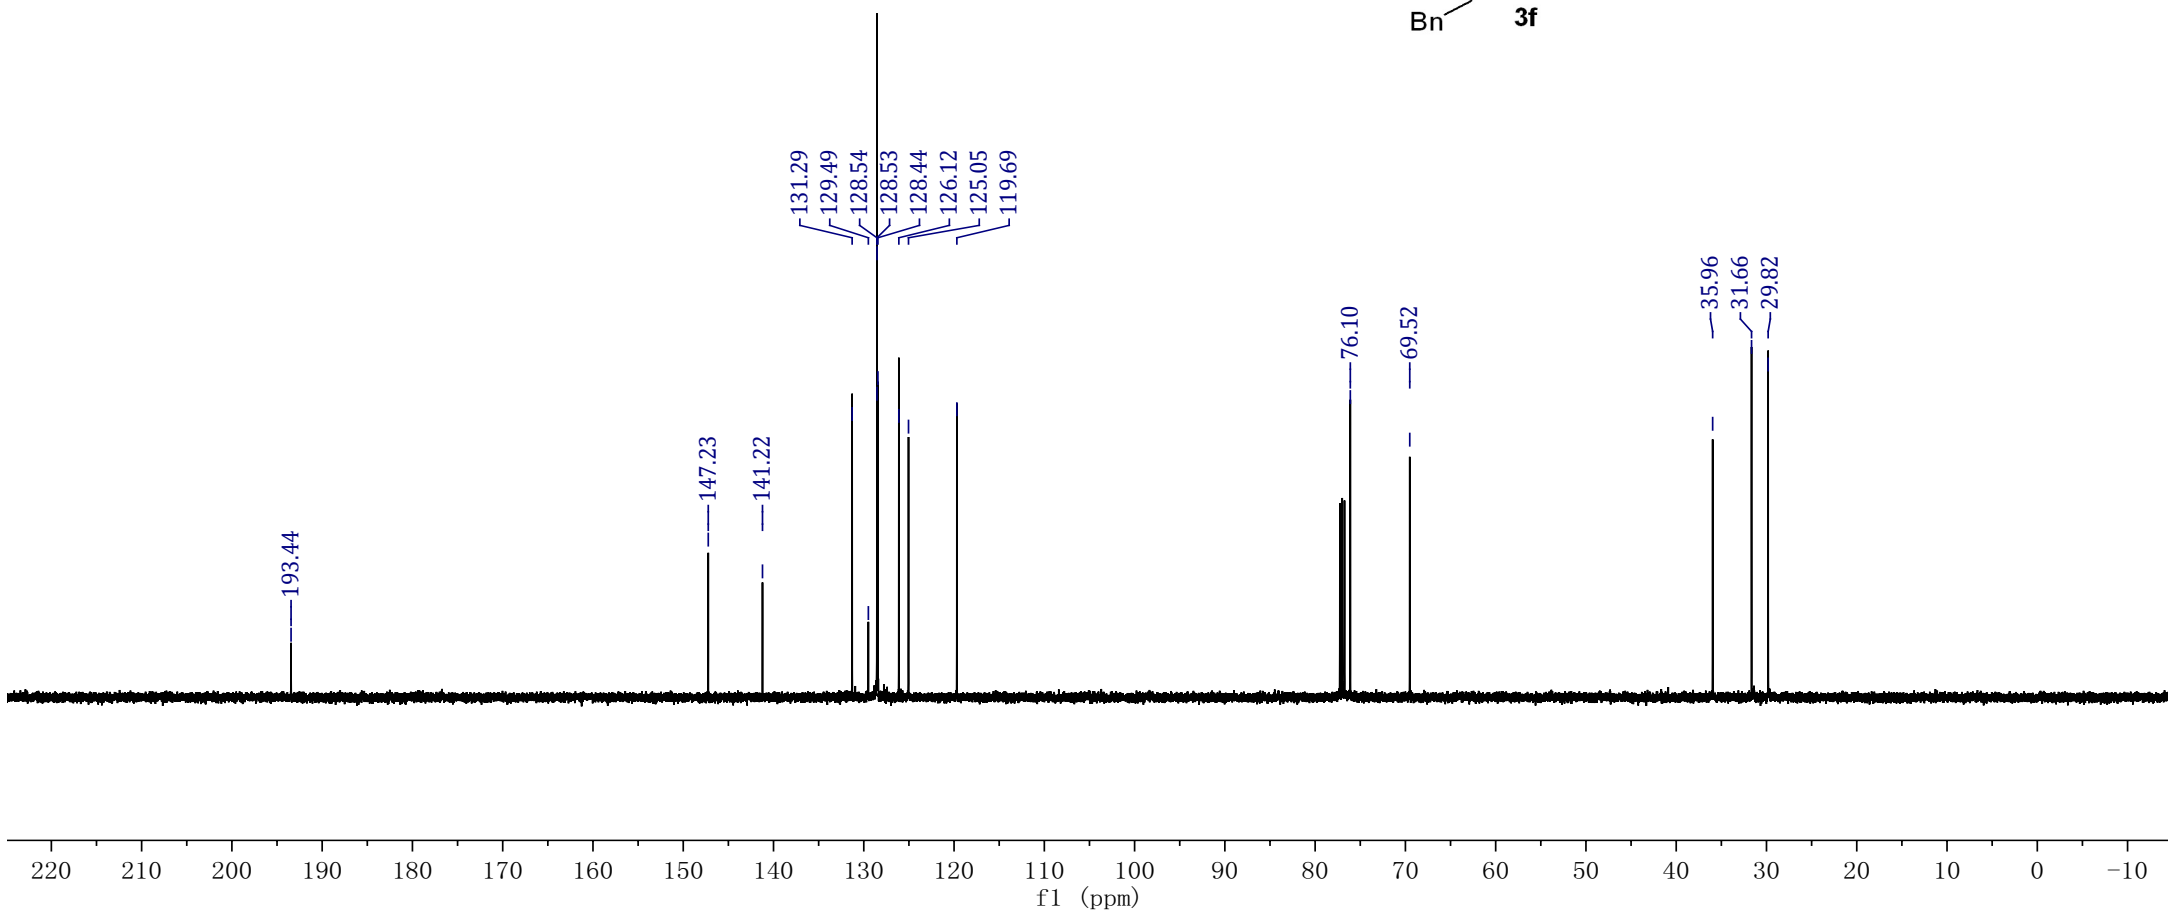

| Parameter                | Value        |
|--------------------------|--------------|
| 1 Title                  | jkg-VI-14A-H |
| 2 Solvent                | CDCl3        |
| 3 Temperature            | 25.0         |
| 4 Relaxation Delay       | 10.0000      |
| 5 Spectrometer Frequency | 499.86       |

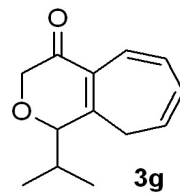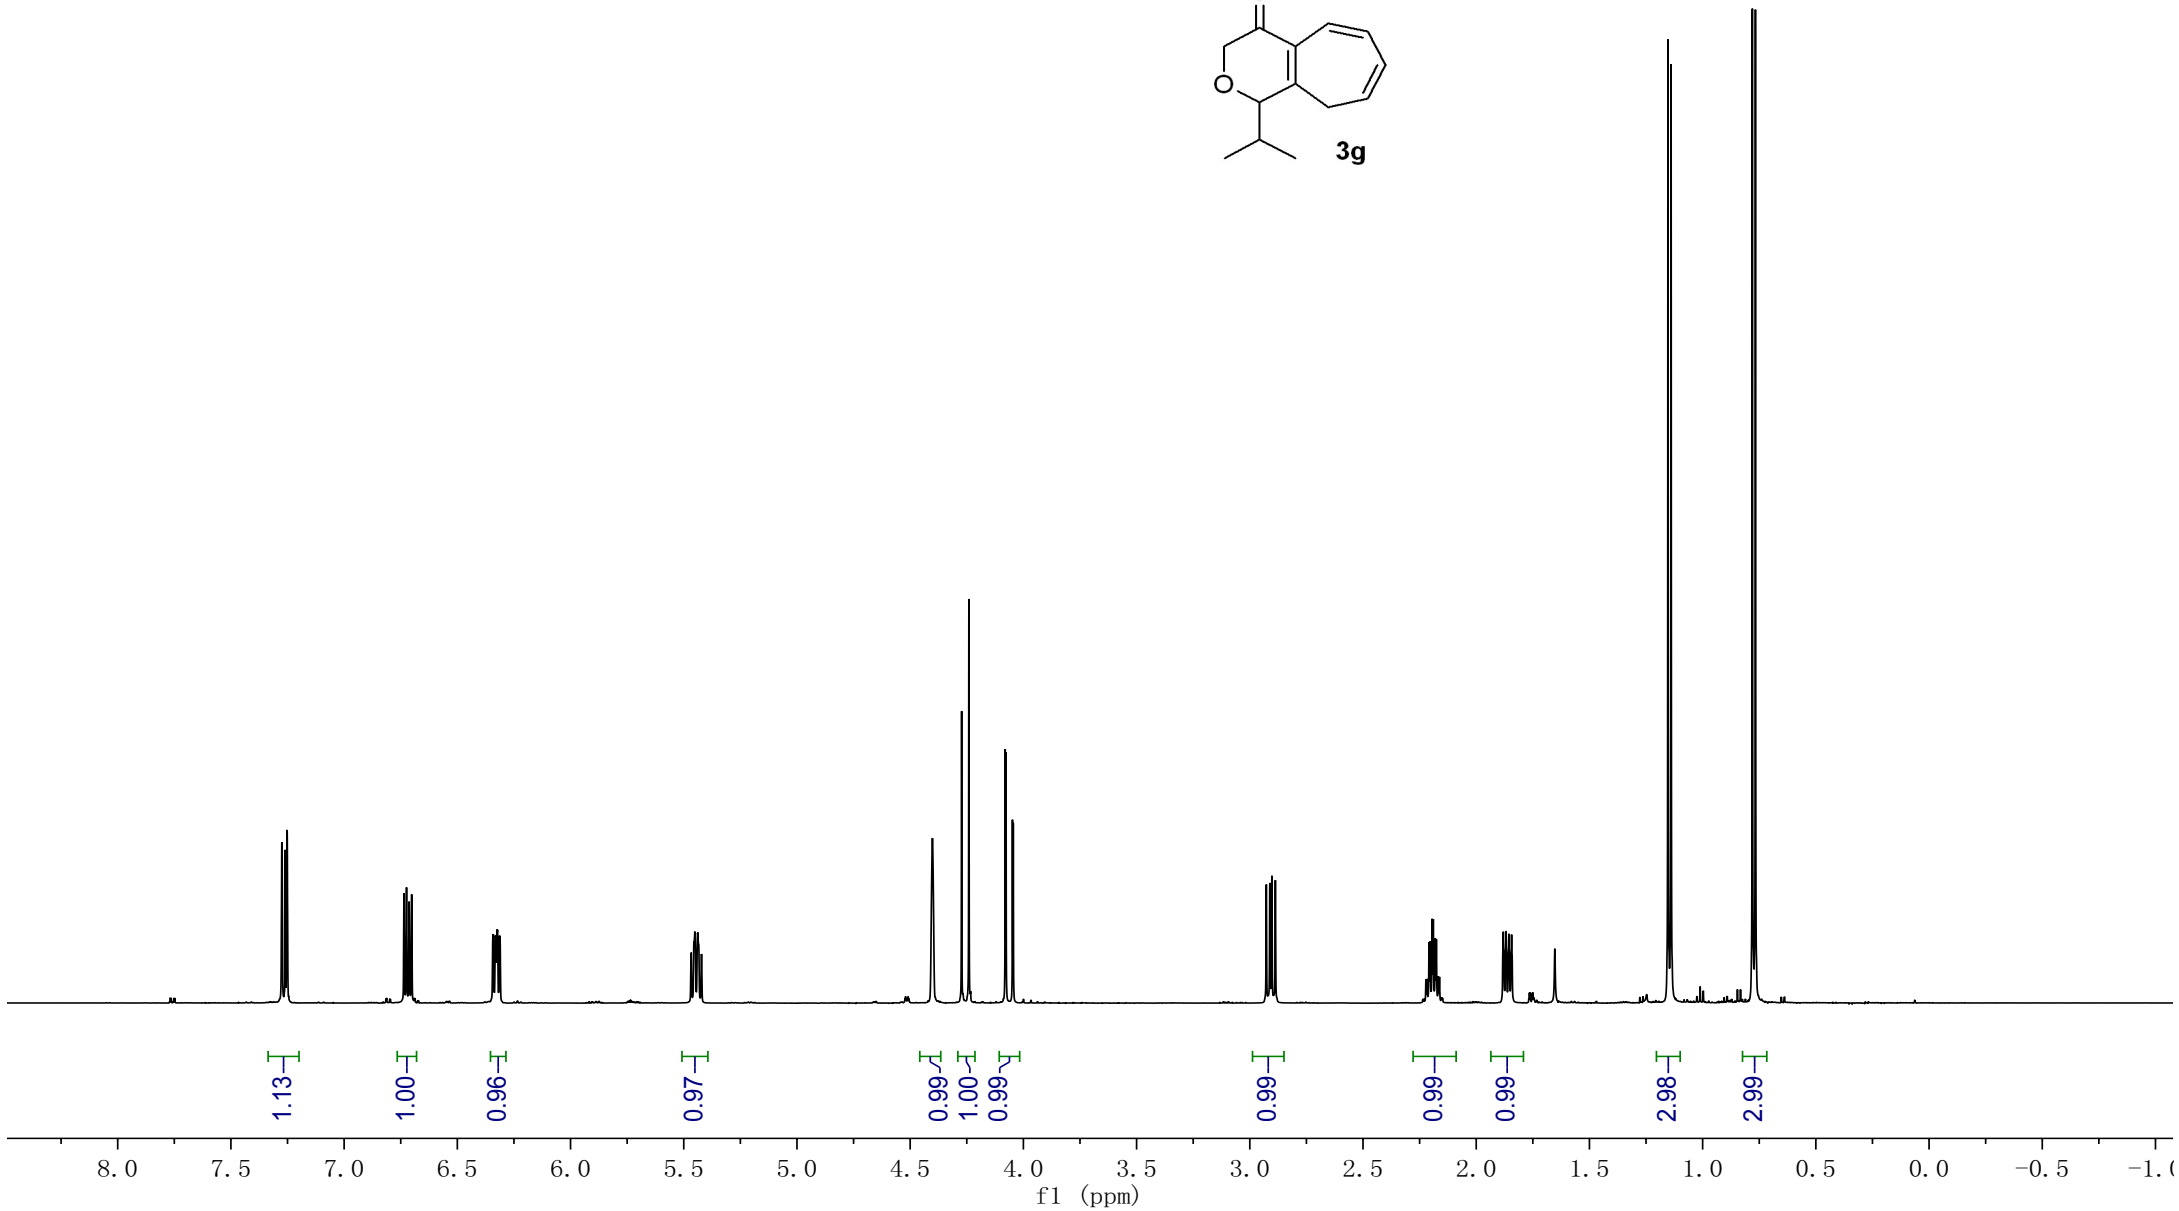

| Parameter                | Value        |
|--------------------------|--------------|
| 1 Title                  | jkg-VI-14A-C |
| 2 Solvent                | CDCl3        |
| 3 Temperature            | 25.0         |
| 4 Relaxation Delay       | 1.0000       |
| 5 Spectrometer Frequency | 125.70       |

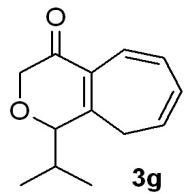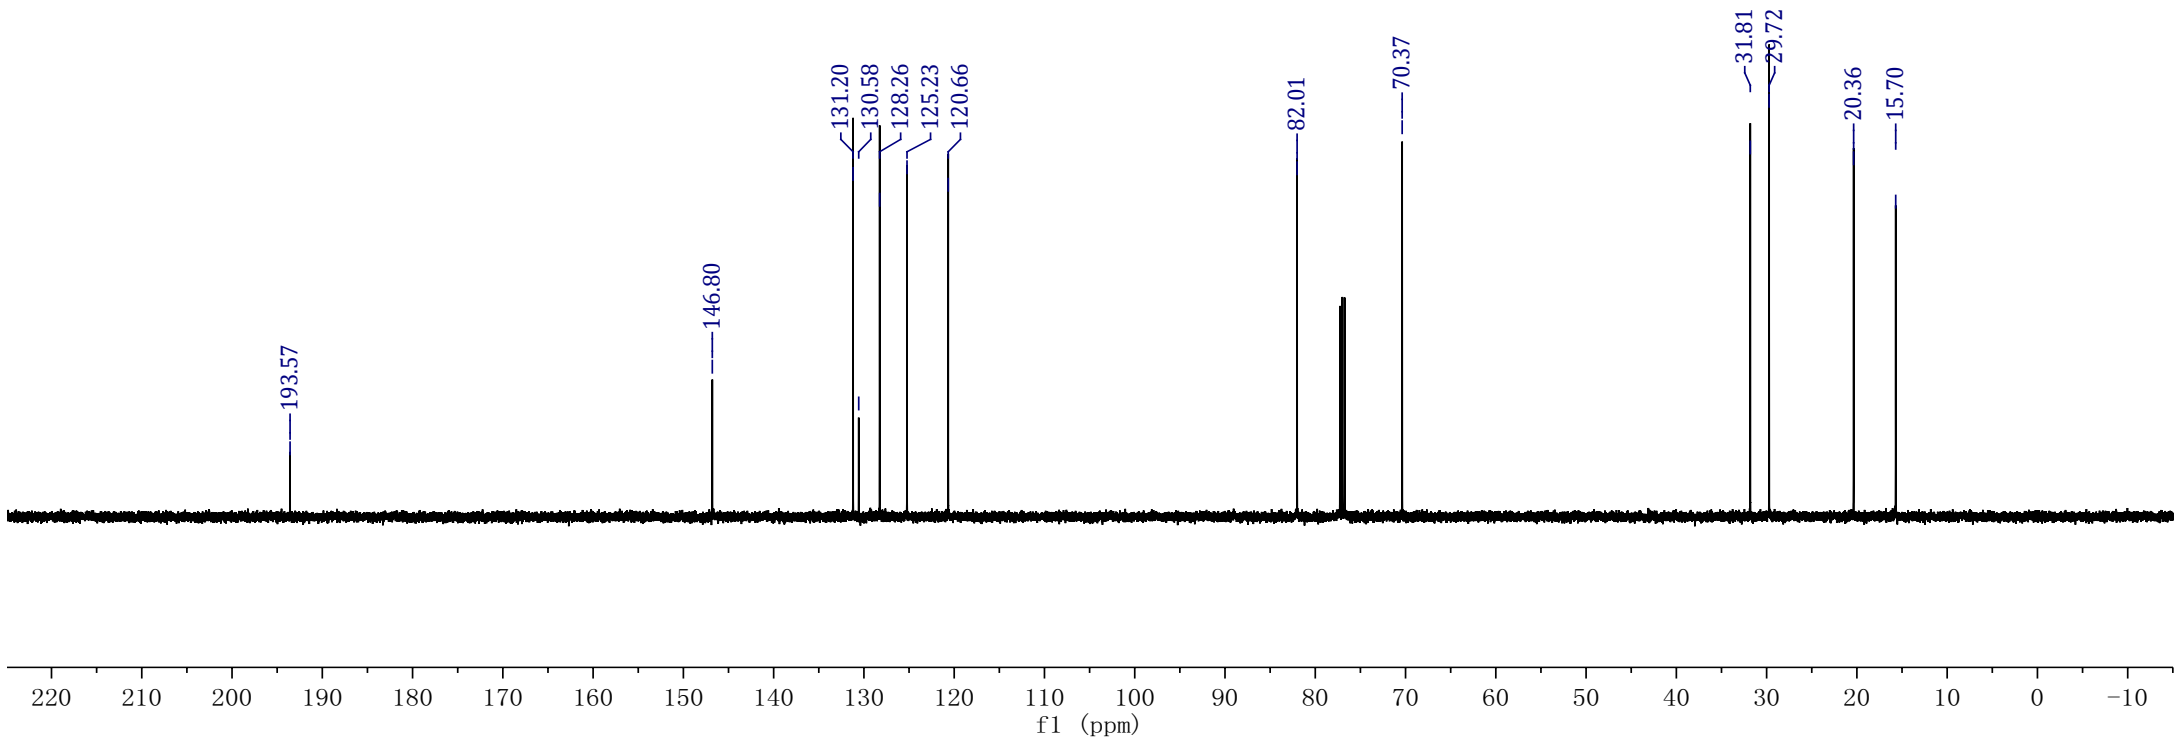



| Parameter                | Value        |
|--------------------------|--------------|
| 1 Title                  | jkg-VI-23C-H |
| 2 Solvent                | CDCl3        |
| 3 Temperature            | 25.0         |
| 4 Relaxation Delay       | 10.0000      |
| 5 Spectrometer Frequency | 499.86       |

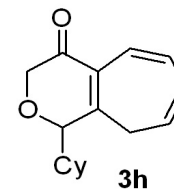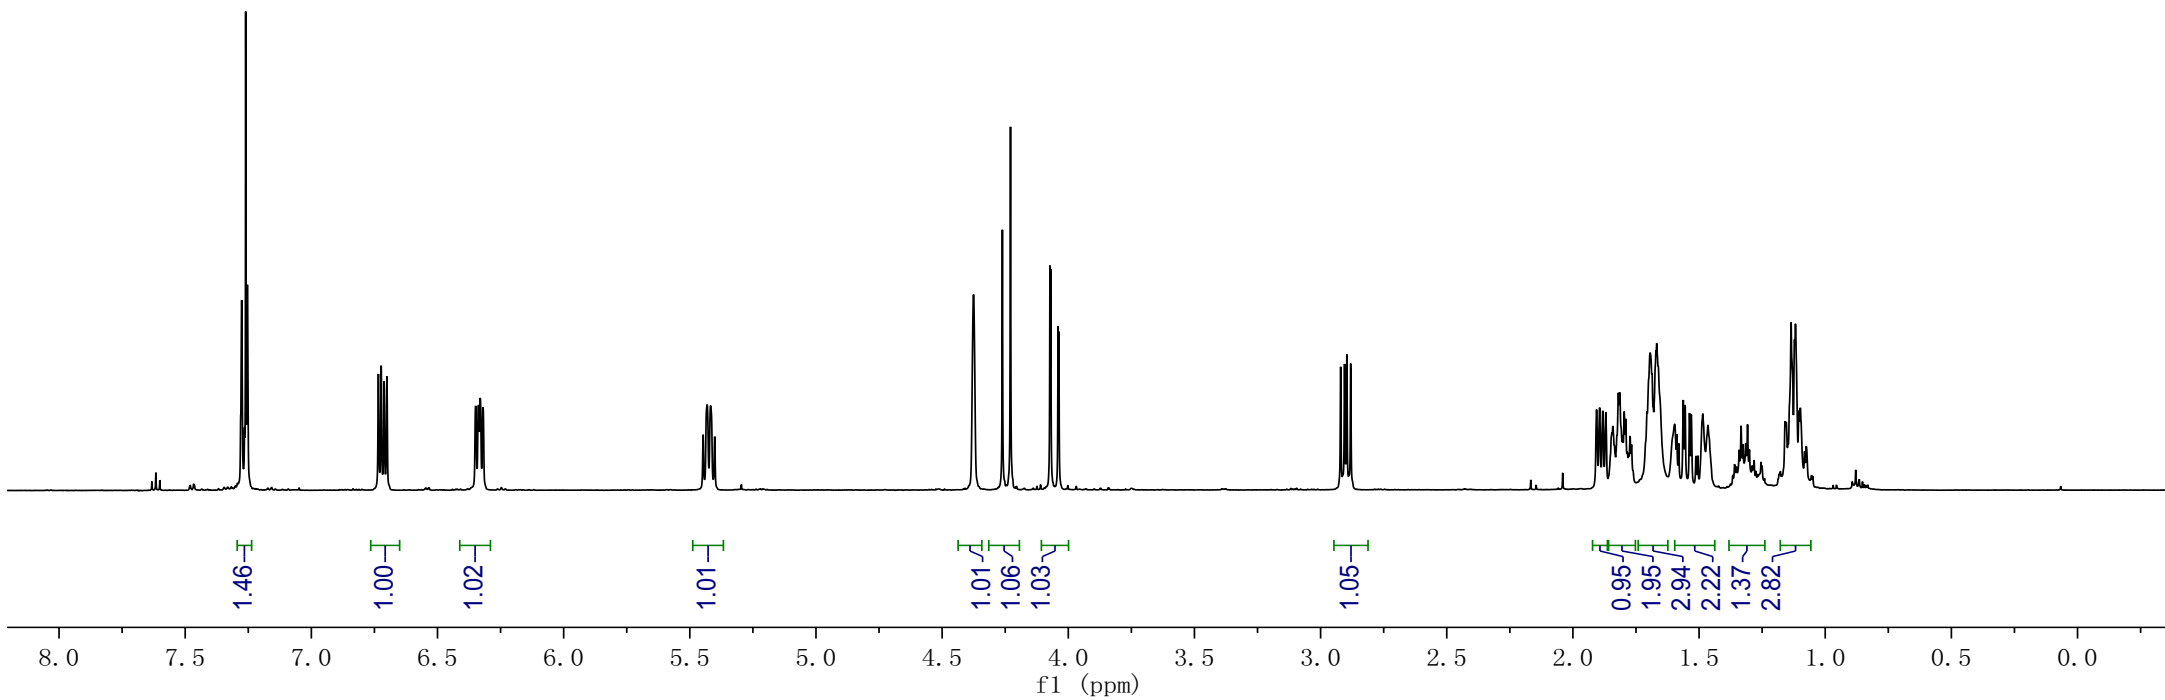

| Parameter                | Value        |
|--------------------------|--------------|
| 1 Title                  | jkg-VI-23C-C |
| 2 Solvent                | CDCl3        |
| 3 Temperature            | 25.0         |
| 4 Relaxation Delay       | 1.0000       |
| 5 Spectrometer Frequency | 125.70       |

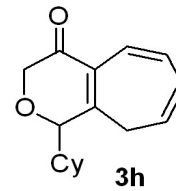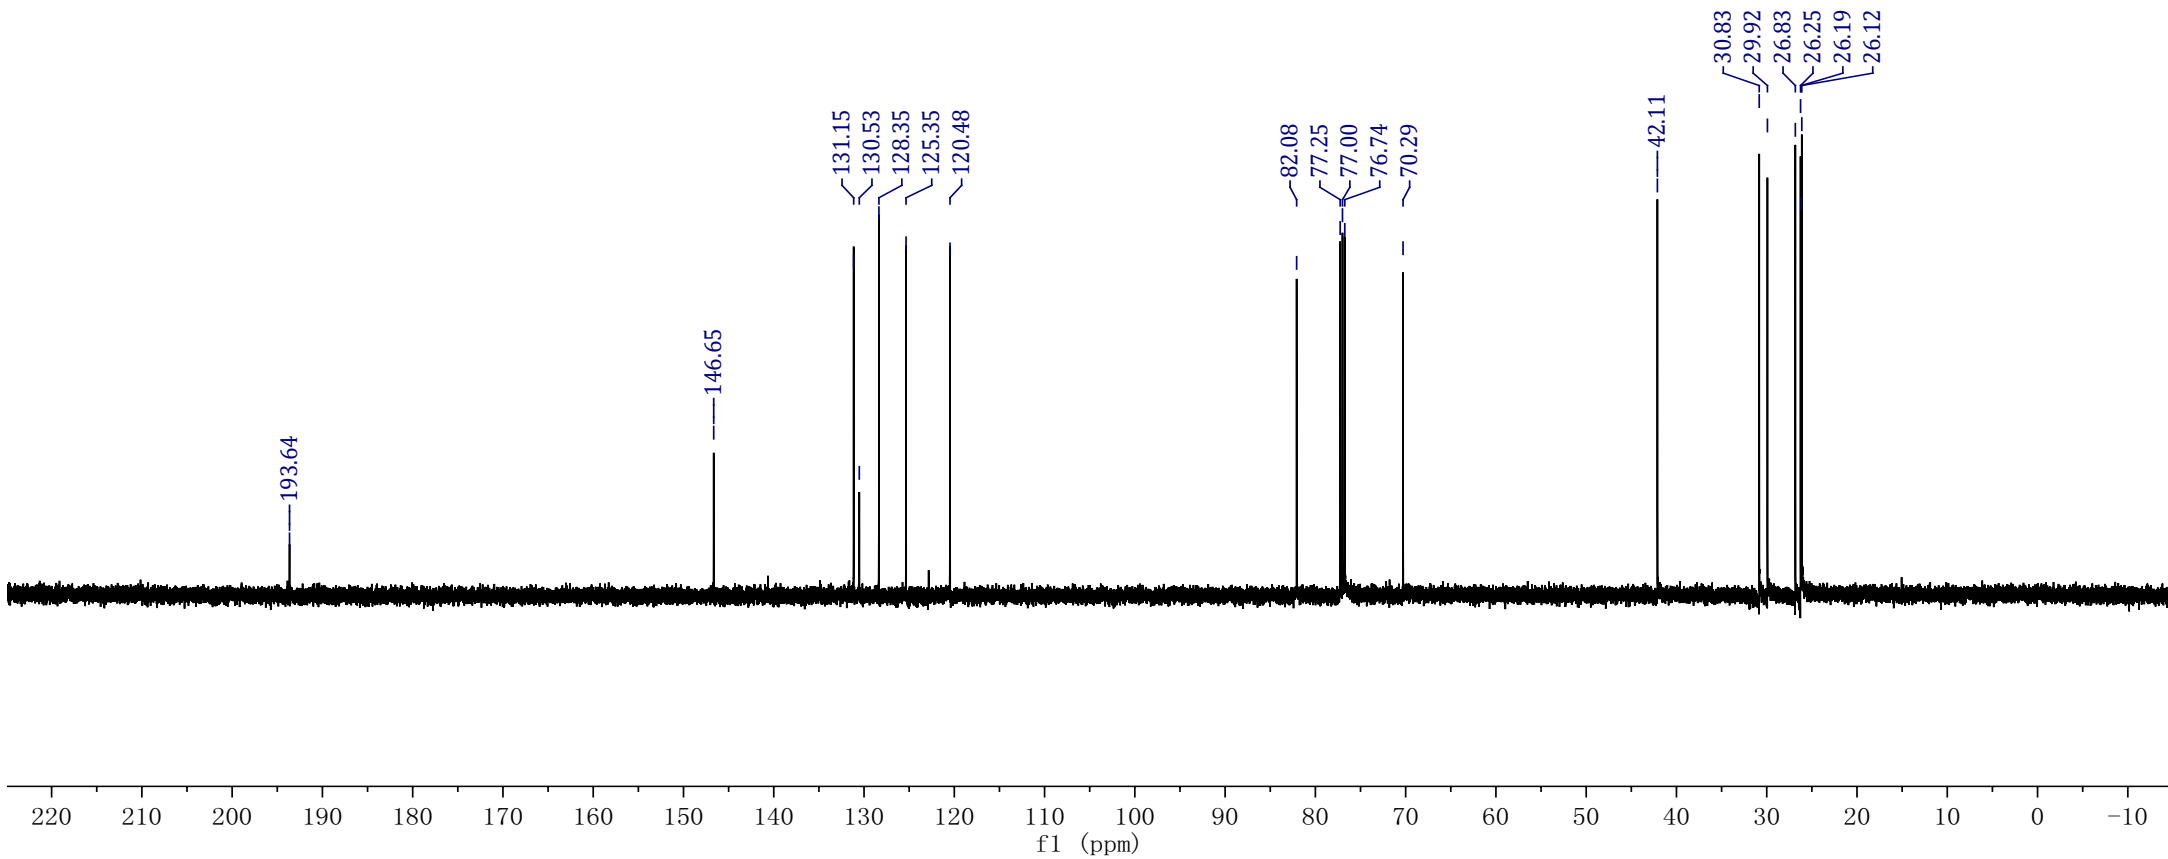

| Parameter                | Value        |
|--------------------------|--------------|
| 1 Title                  | jkg-VI-15B-H |
| 2 Solvent                | cdcl3        |
| 3 Temperature            | 25.0         |
| 4 Relaxation Delay       | 10.0000      |
| 5 Spectrometer Frequency | 599.64       |

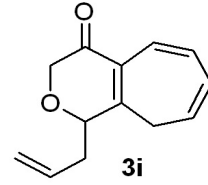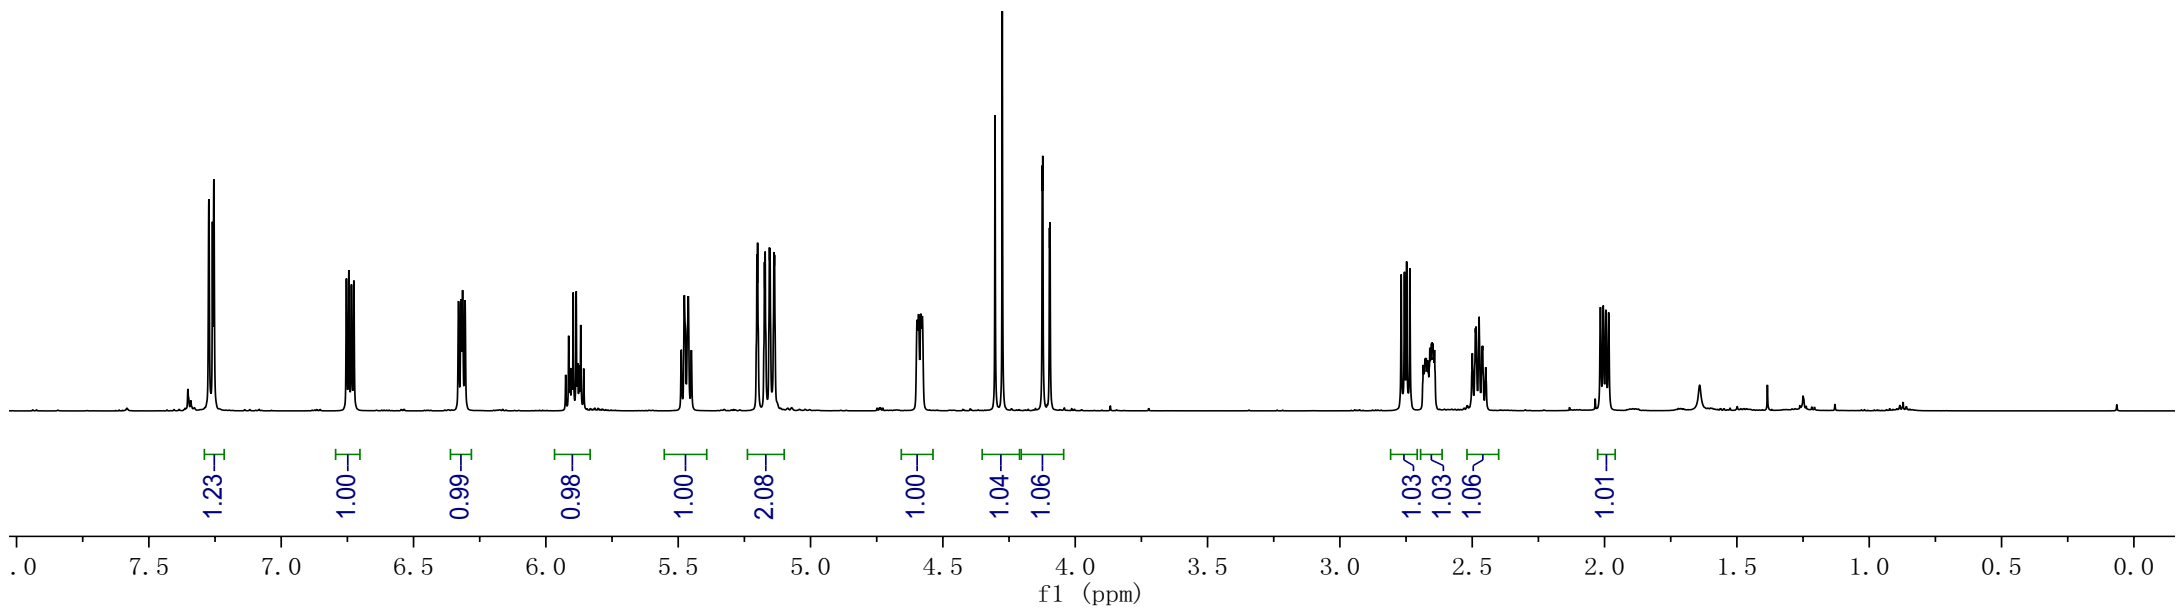

| Parameter                | Value        |
|--------------------------|--------------|
| 1 Title                  | jkg-VI-15B-C |
| 2 Solvent                | cdcl3        |
| 3 Temperature            | 25.0         |
| 4 Relaxation Delay       | 1.0000       |
| 5 Spectrometer Frequency | 150.79       |

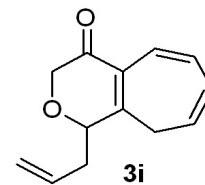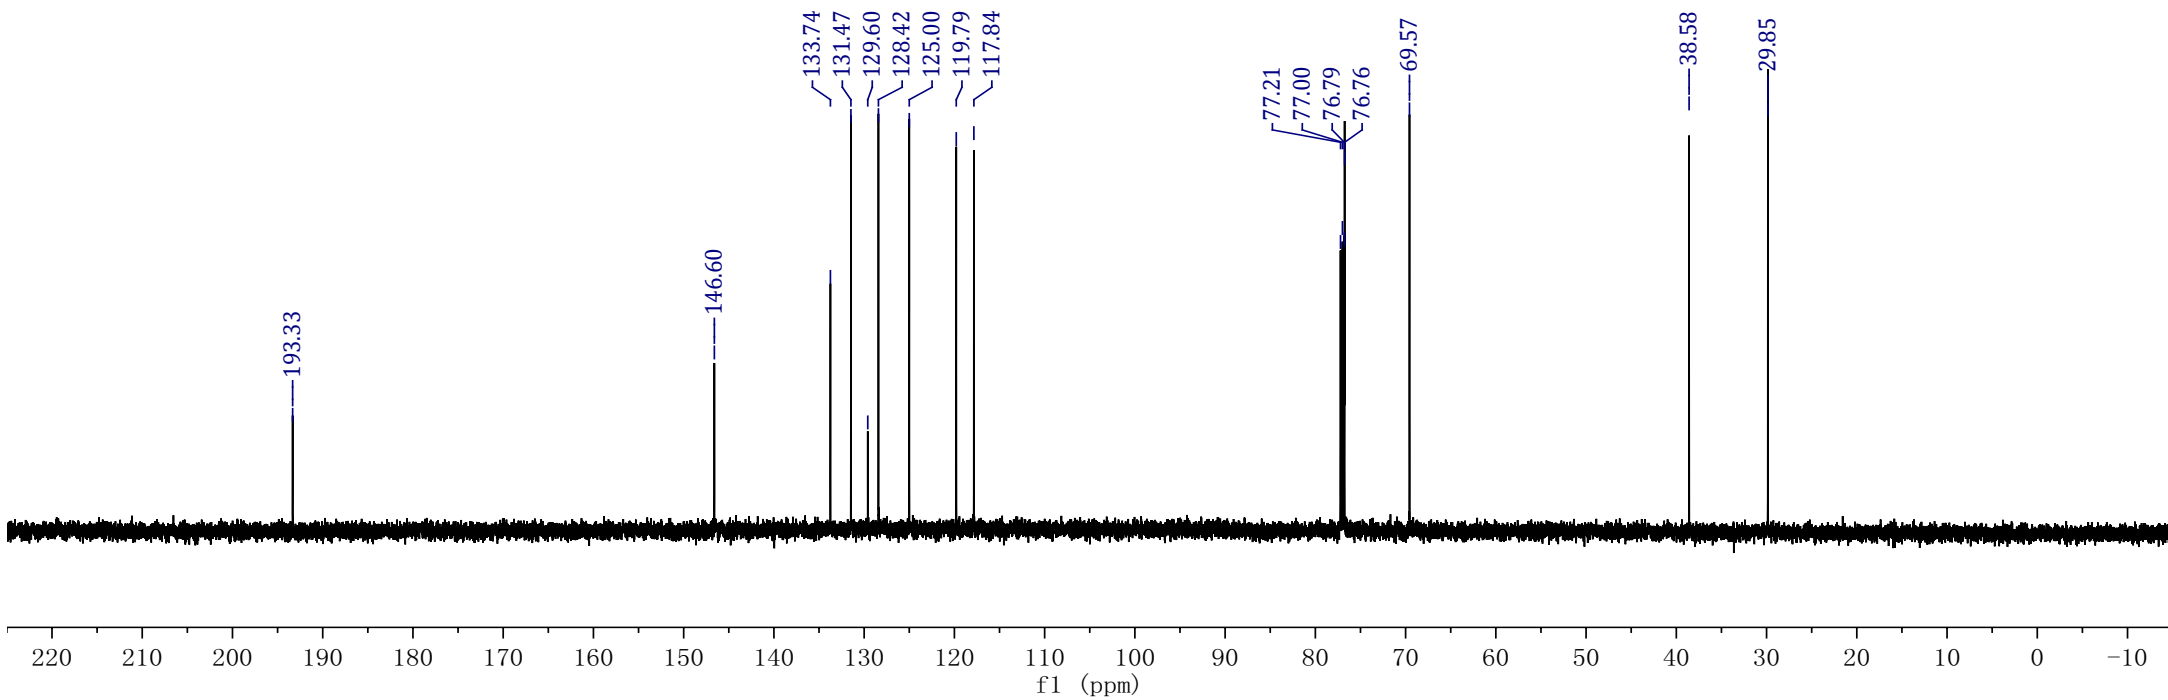

| Parameter                | Value        |
|--------------------------|--------------|
| 1 Title                  | jkg-VI-14B-H |
| 2 Solvent                | cdcl3        |
| 3 Temperature            | 25.0         |
| 4 Relaxation Delay       | 10.0000      |
| 5 Spectrometer Frequency | 599.64       |

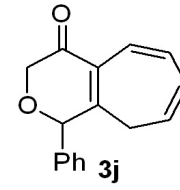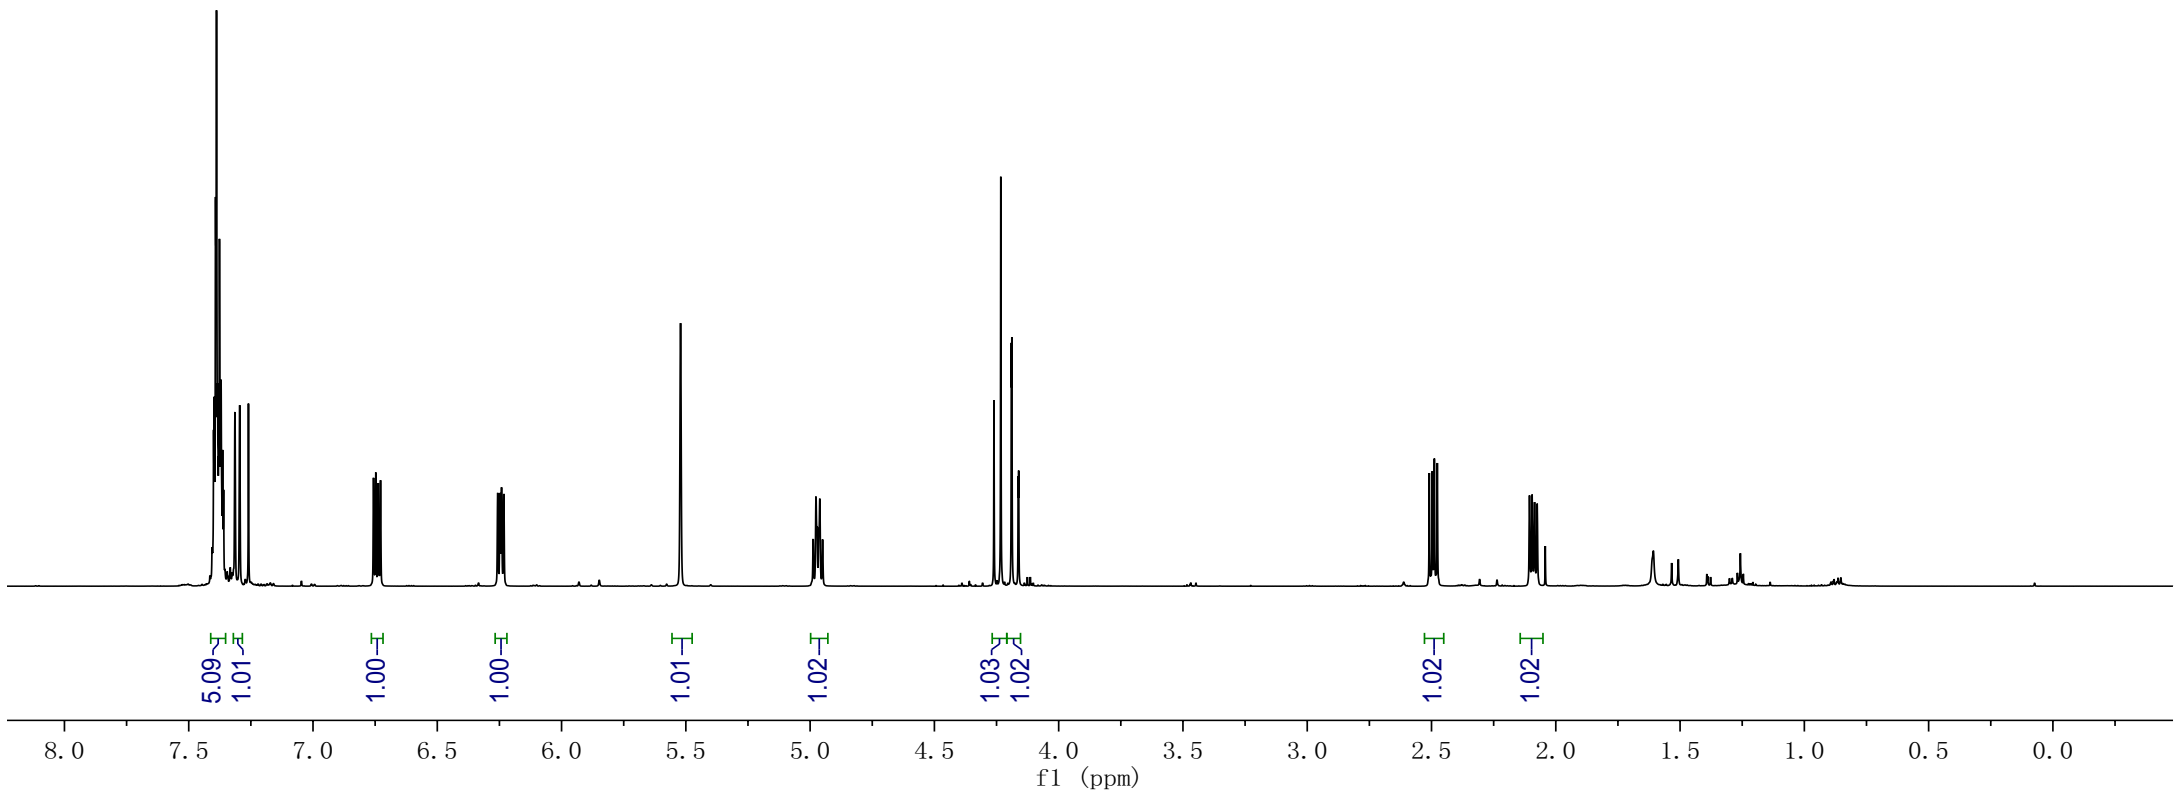

| Parameter                | Value        |
|--------------------------|--------------|
| 1 Title                  | jkg-VI-14B-C |
| 2 Solvent                | cdcl3        |
| 3 Temperature            | 25.0         |
| 4 Relaxation Delay       | 1.0000       |
| 5 Spectrometer Frequency | 150.79       |

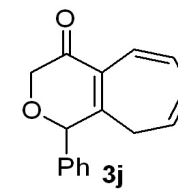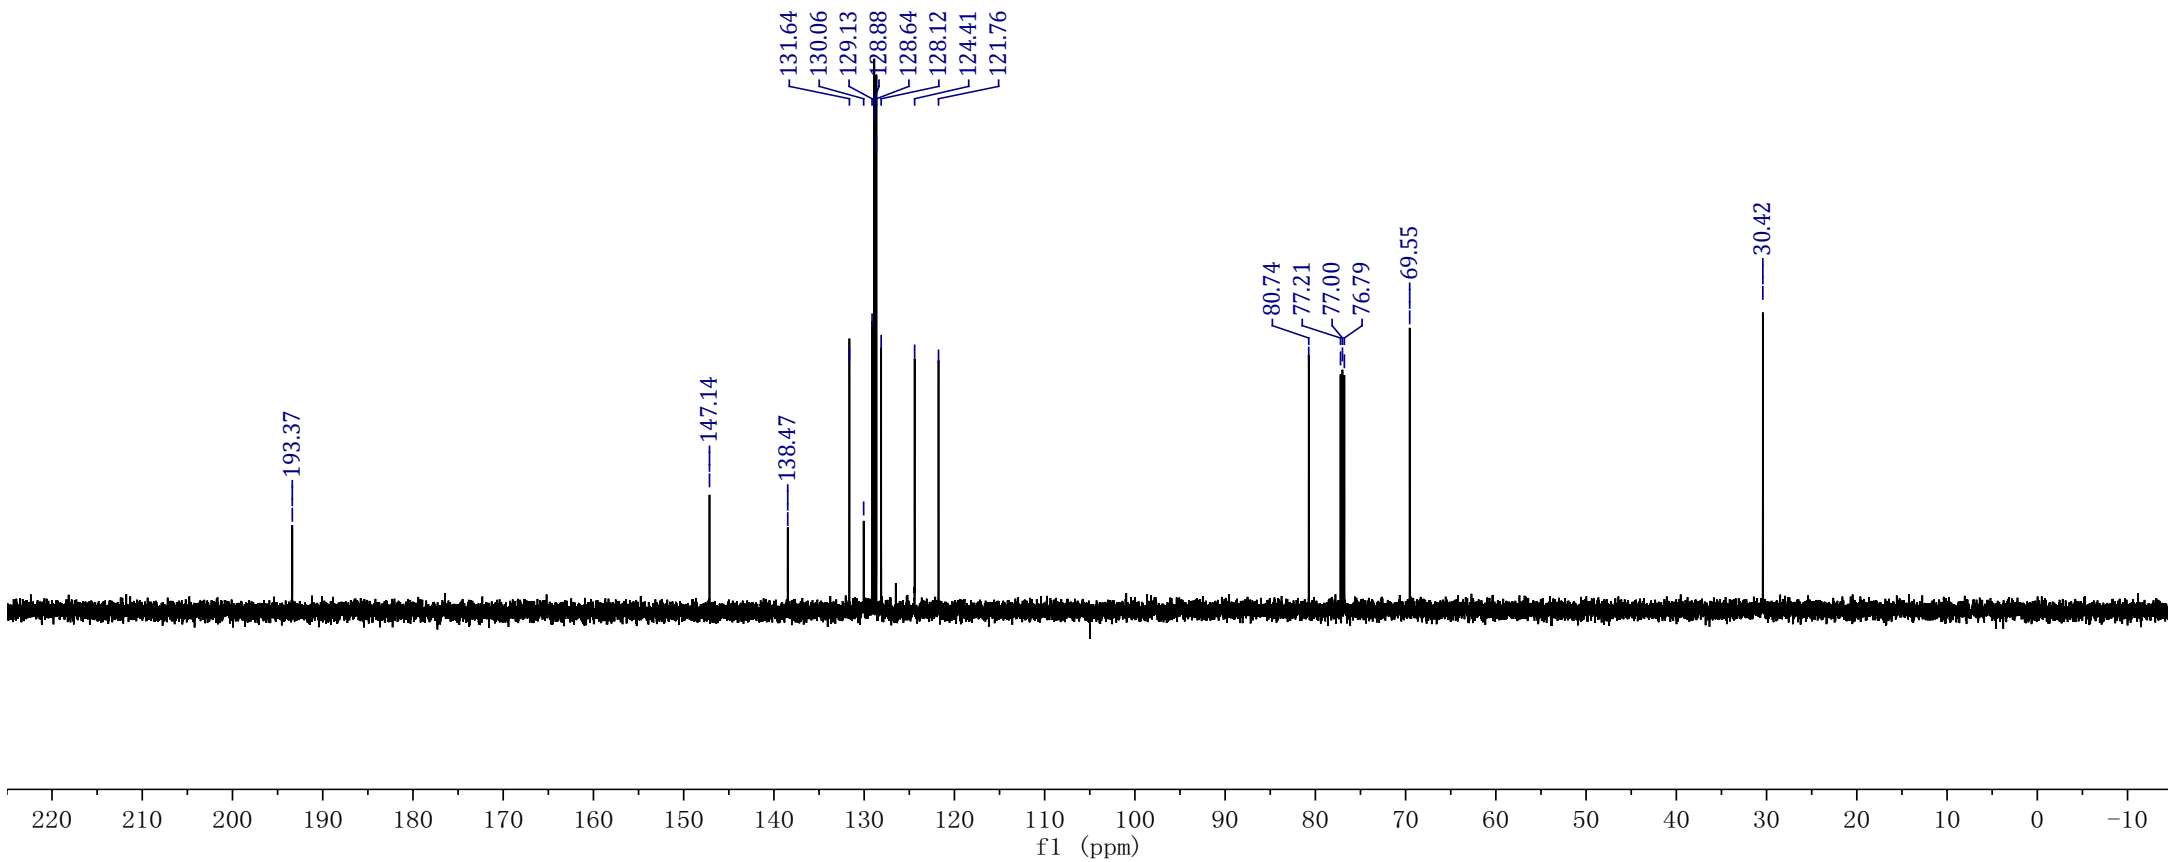

| Parameter                | Value         |
|--------------------------|---------------|
| 1 Title                  | jkg-VI-22B-H1 |
| 2 Solvent                | CDCl3         |
| 3 Temperature            | 25.0          |
| 4 Relaxation Delay       | 10.0000       |
| 5 Spectrometer Frequency | 499.86        |

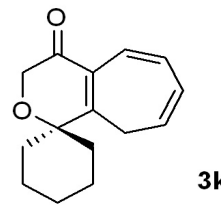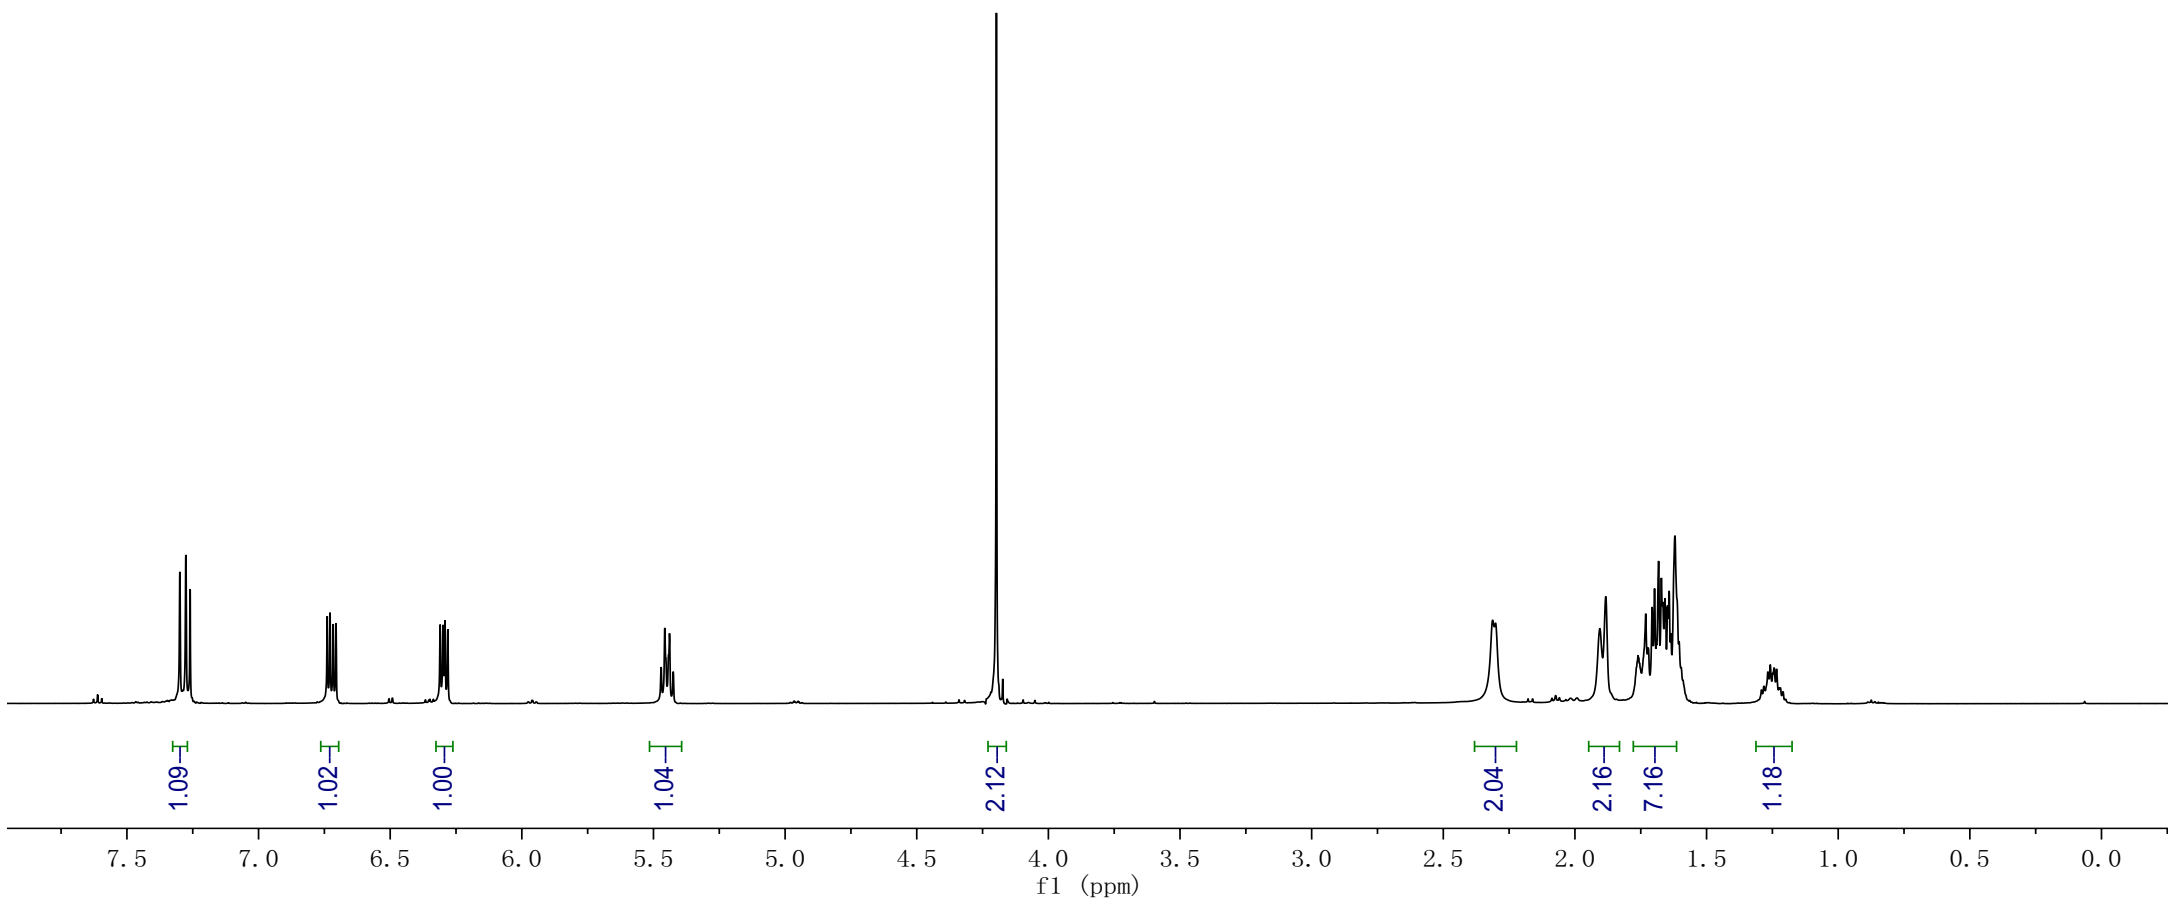

| Parameter                | Value        |
|--------------------------|--------------|
| 1 Title                  | jkg-VI-22B-C |
| 2 Solvent                | CDCl3        |
| 3 Temperature            | 25.0         |
| 4 Relaxation Delay       | 1.0000       |
| 5 Spectrometer Frequency | 125.70       |

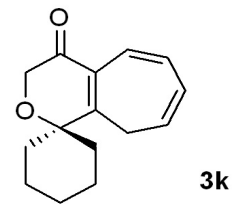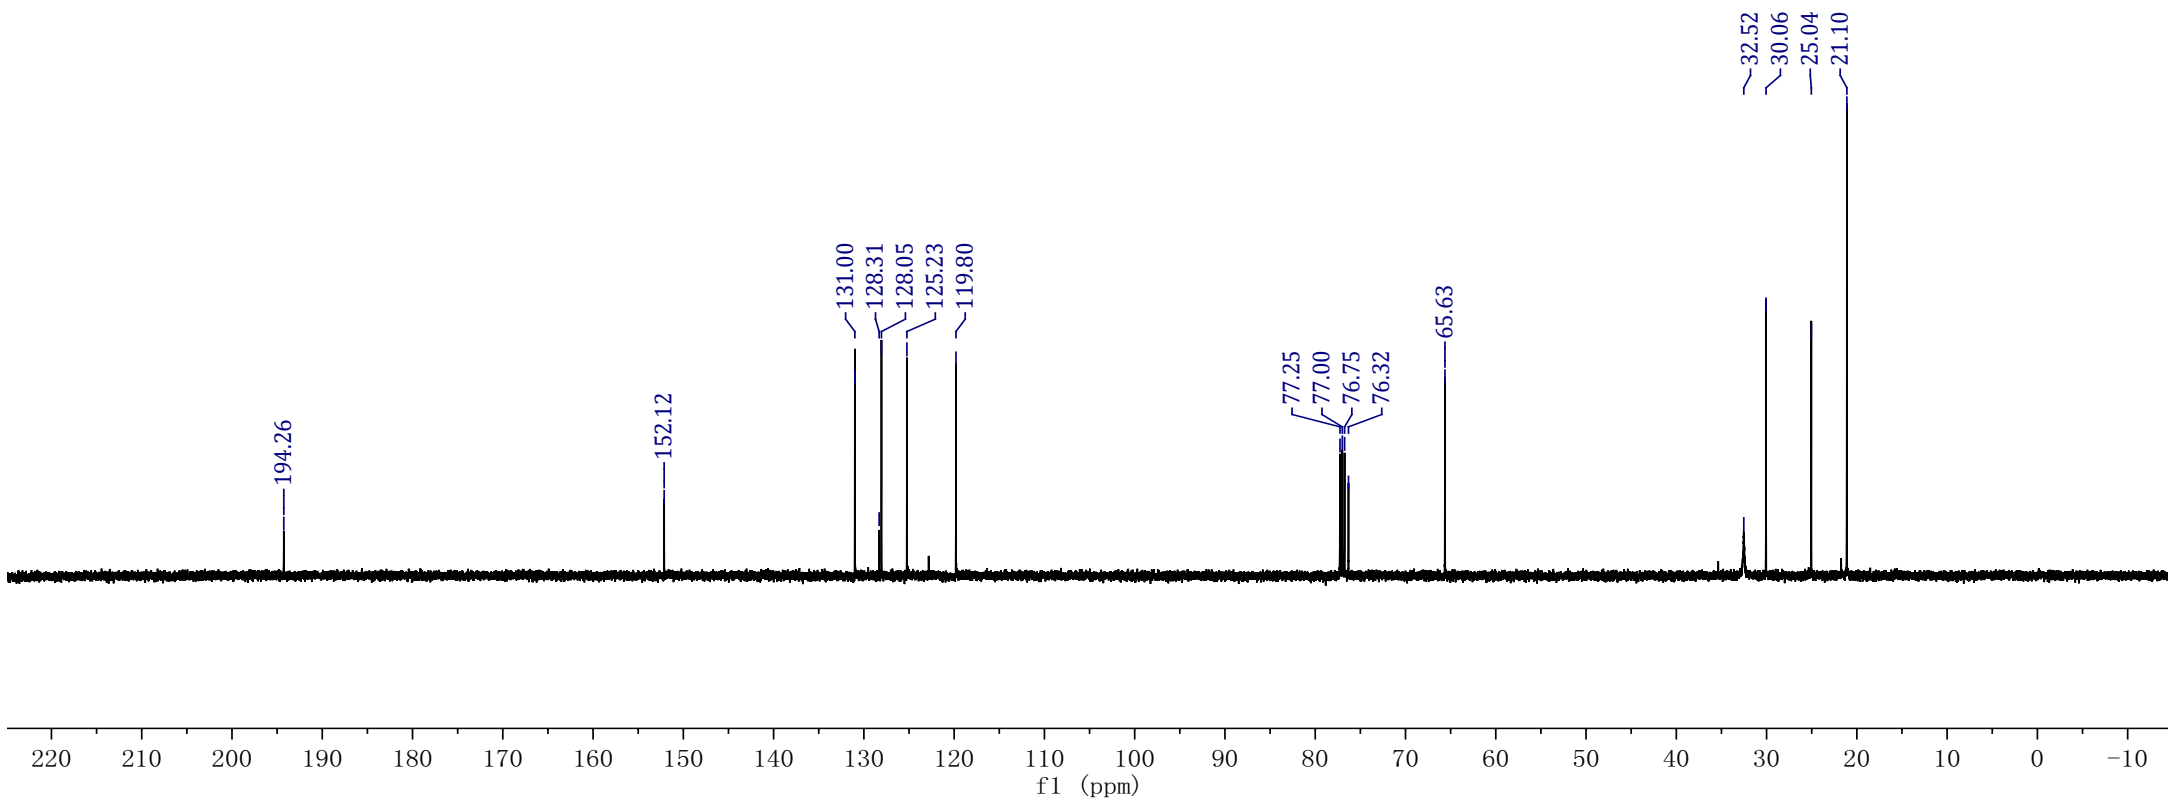



| Parameter                | Value        |
|--------------------------|--------------|
| 1 Title                  | jkg-VI-17B-H |
| 2 Solvent                | CDCl3        |
| 3 Temperature            | 20.0         |
| 4 Relaxation Delay       | 10.0000      |
| 5 Spectrometer Frequency | 499.86       |

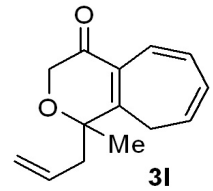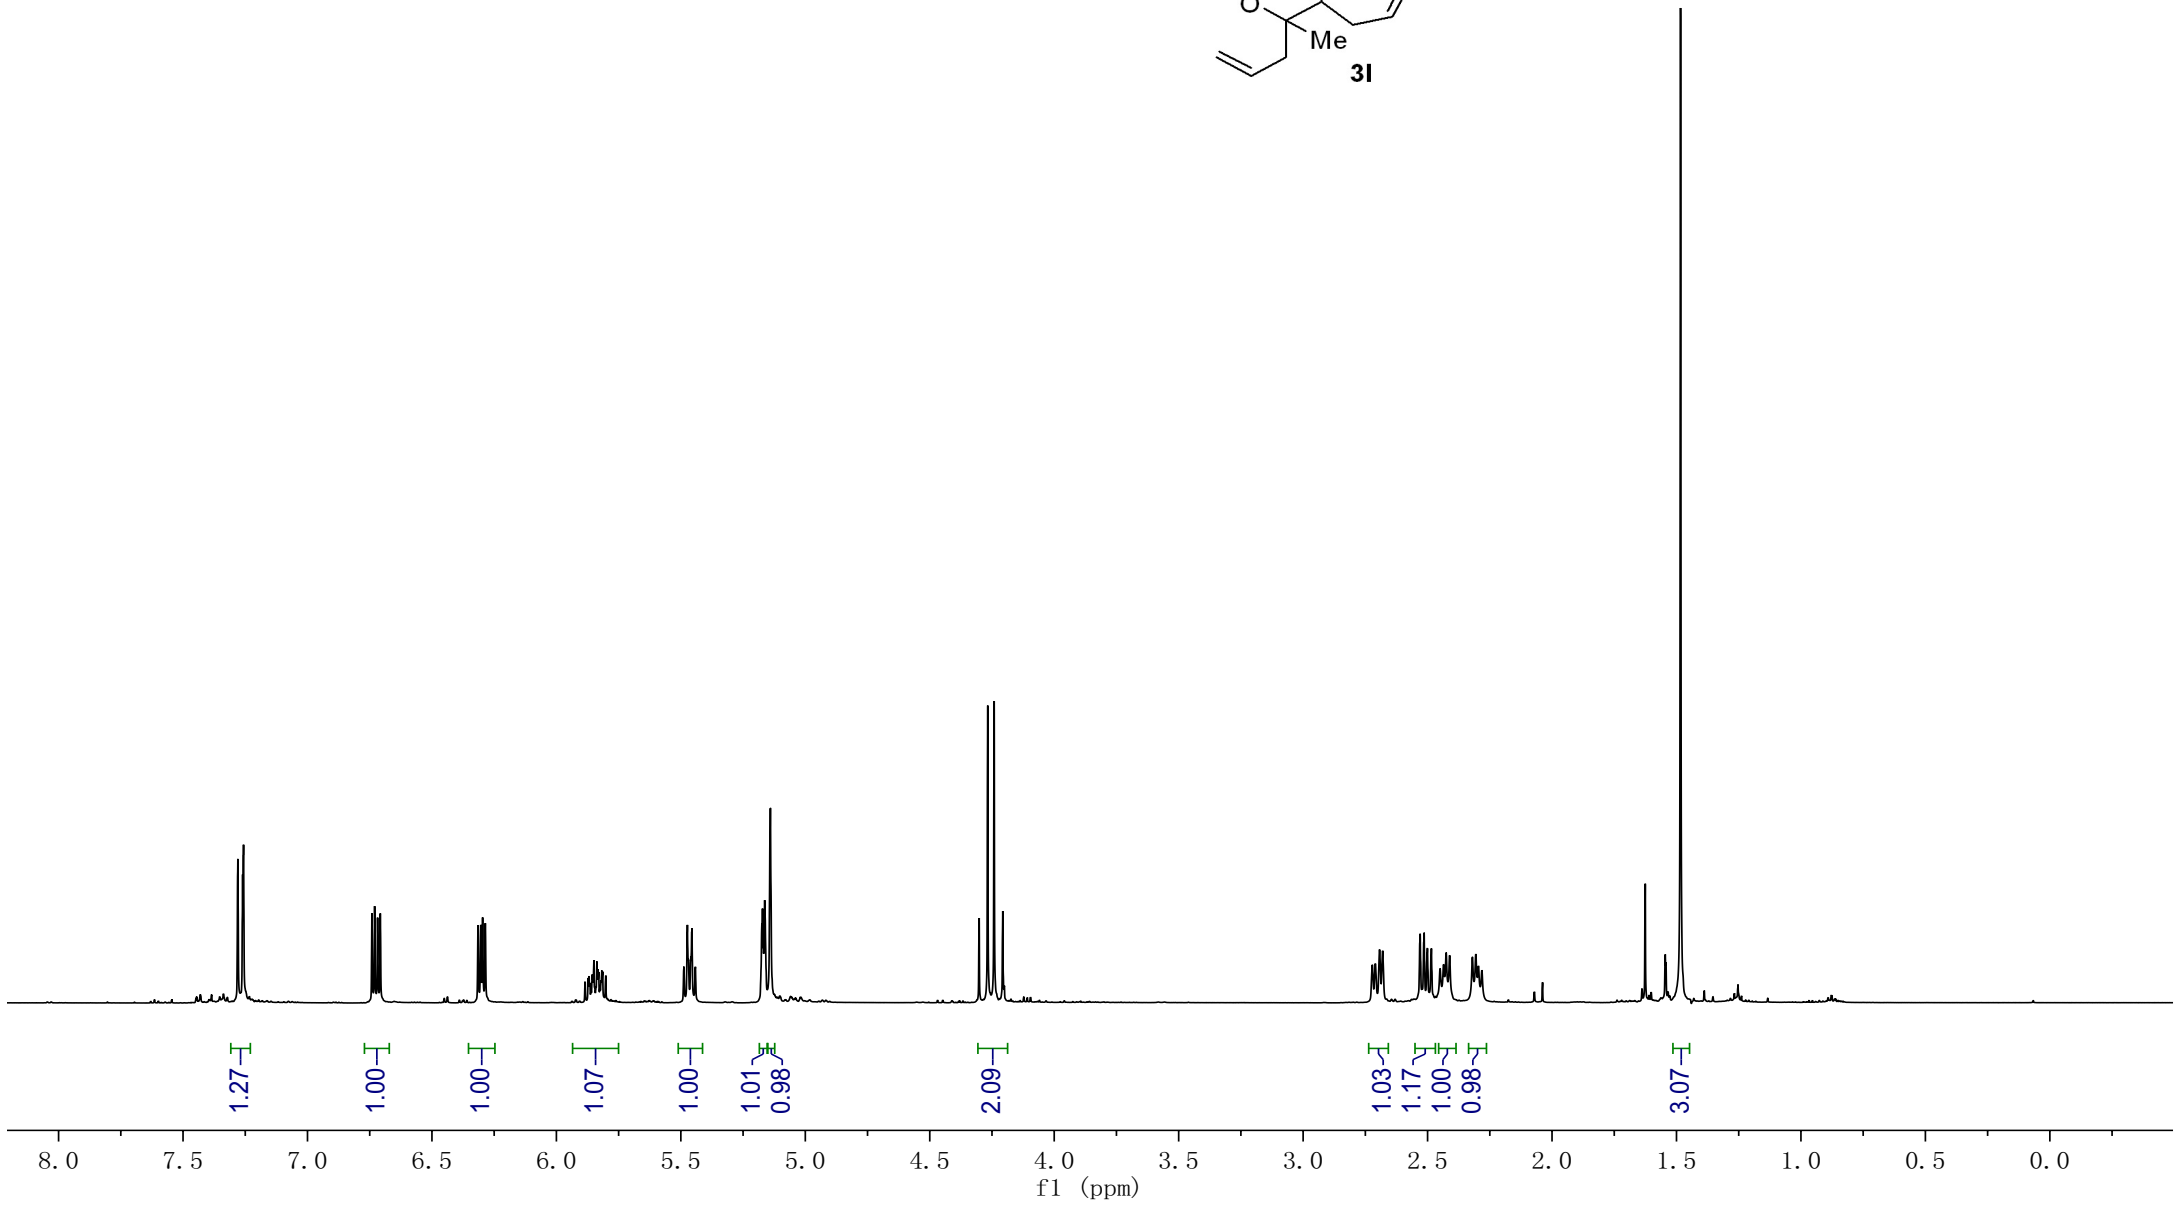

| Parameter                | Value        |
|--------------------------|--------------|
| 1 Title                  | jkg-VI-17B-C |
| 2 Solvent                | CDCl3        |
| 3 Temperature            | 20.0         |
| 4 Relaxation Delay       | 1.0000       |
| 5 Spectrometer Frequency | 125.70       |

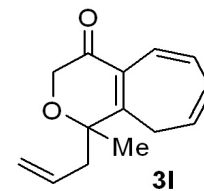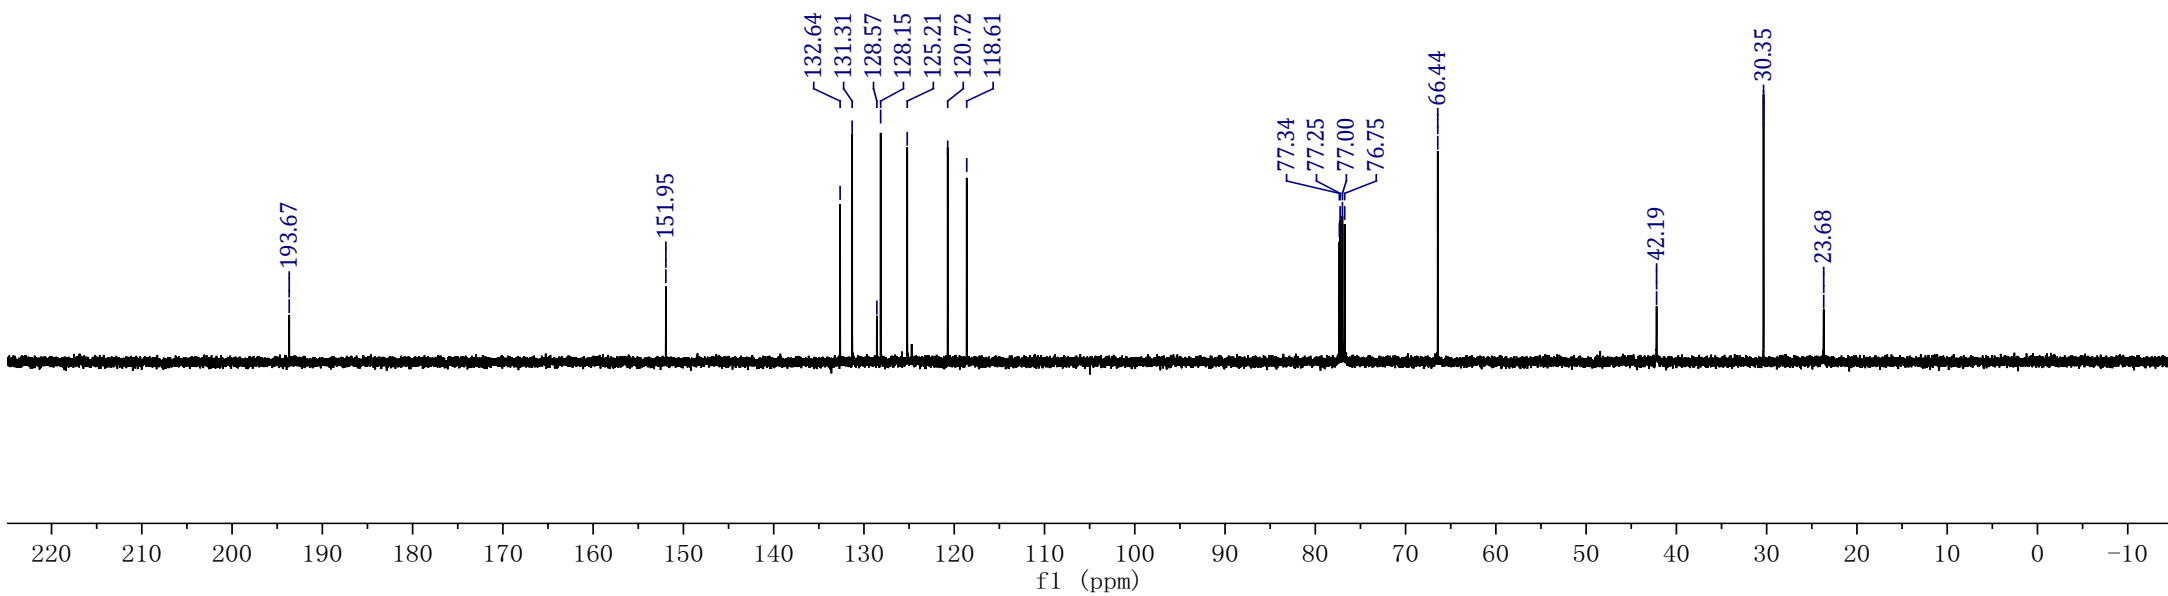

| Parameter                | Value        |
|--------------------------|--------------|
| 1 Title                  | jkg-Vi-18B-H |
| 2 Solvent                | CDCl3        |
| 3 Temperature            | 20.0         |
| 4 Relaxation Delay       | 10.0000      |
| 5 Spectrometer Frequency | 499.86       |

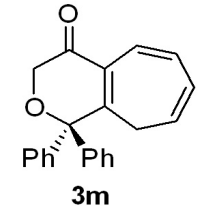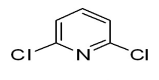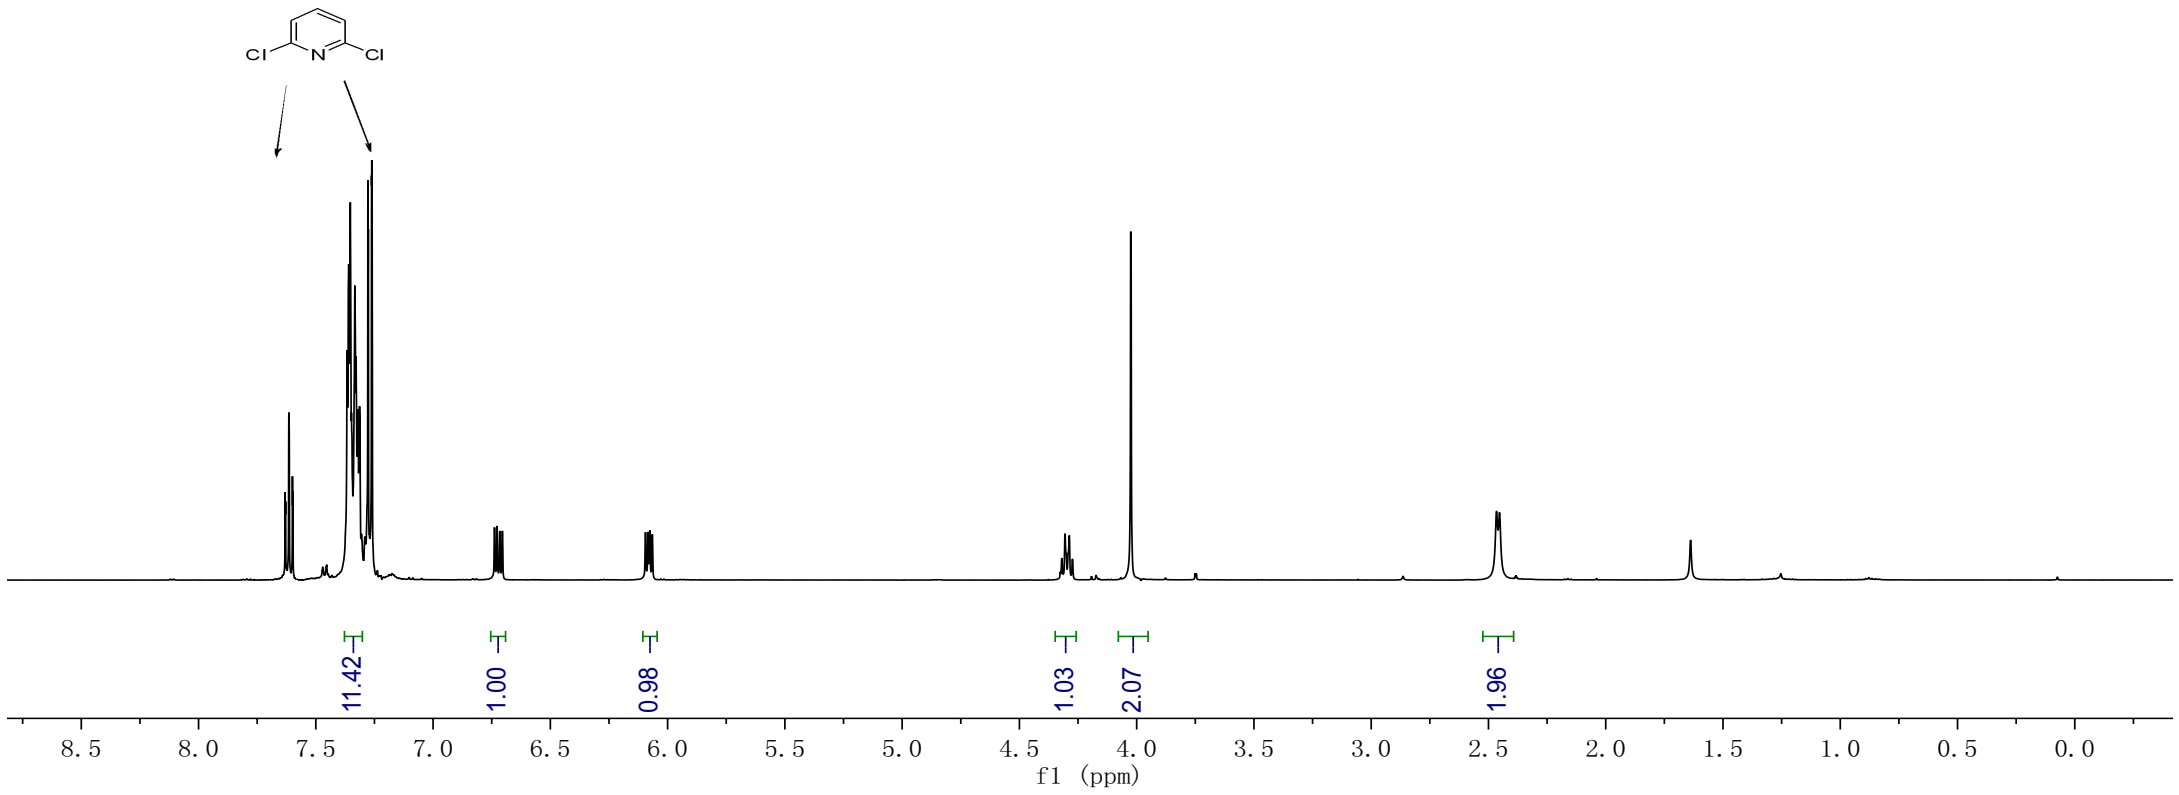

| Parameter                | Value        |
|--------------------------|--------------|
| 1 Title                  | jkg-Vi-18B-C |
| 2 Solvent                | CDCl3        |
| 3 Temperature            | 20.0         |
| 4 Relaxation Delay       | 1.0000       |
| 5 Spectrometer Frequency | 125.70       |

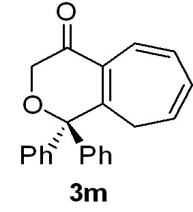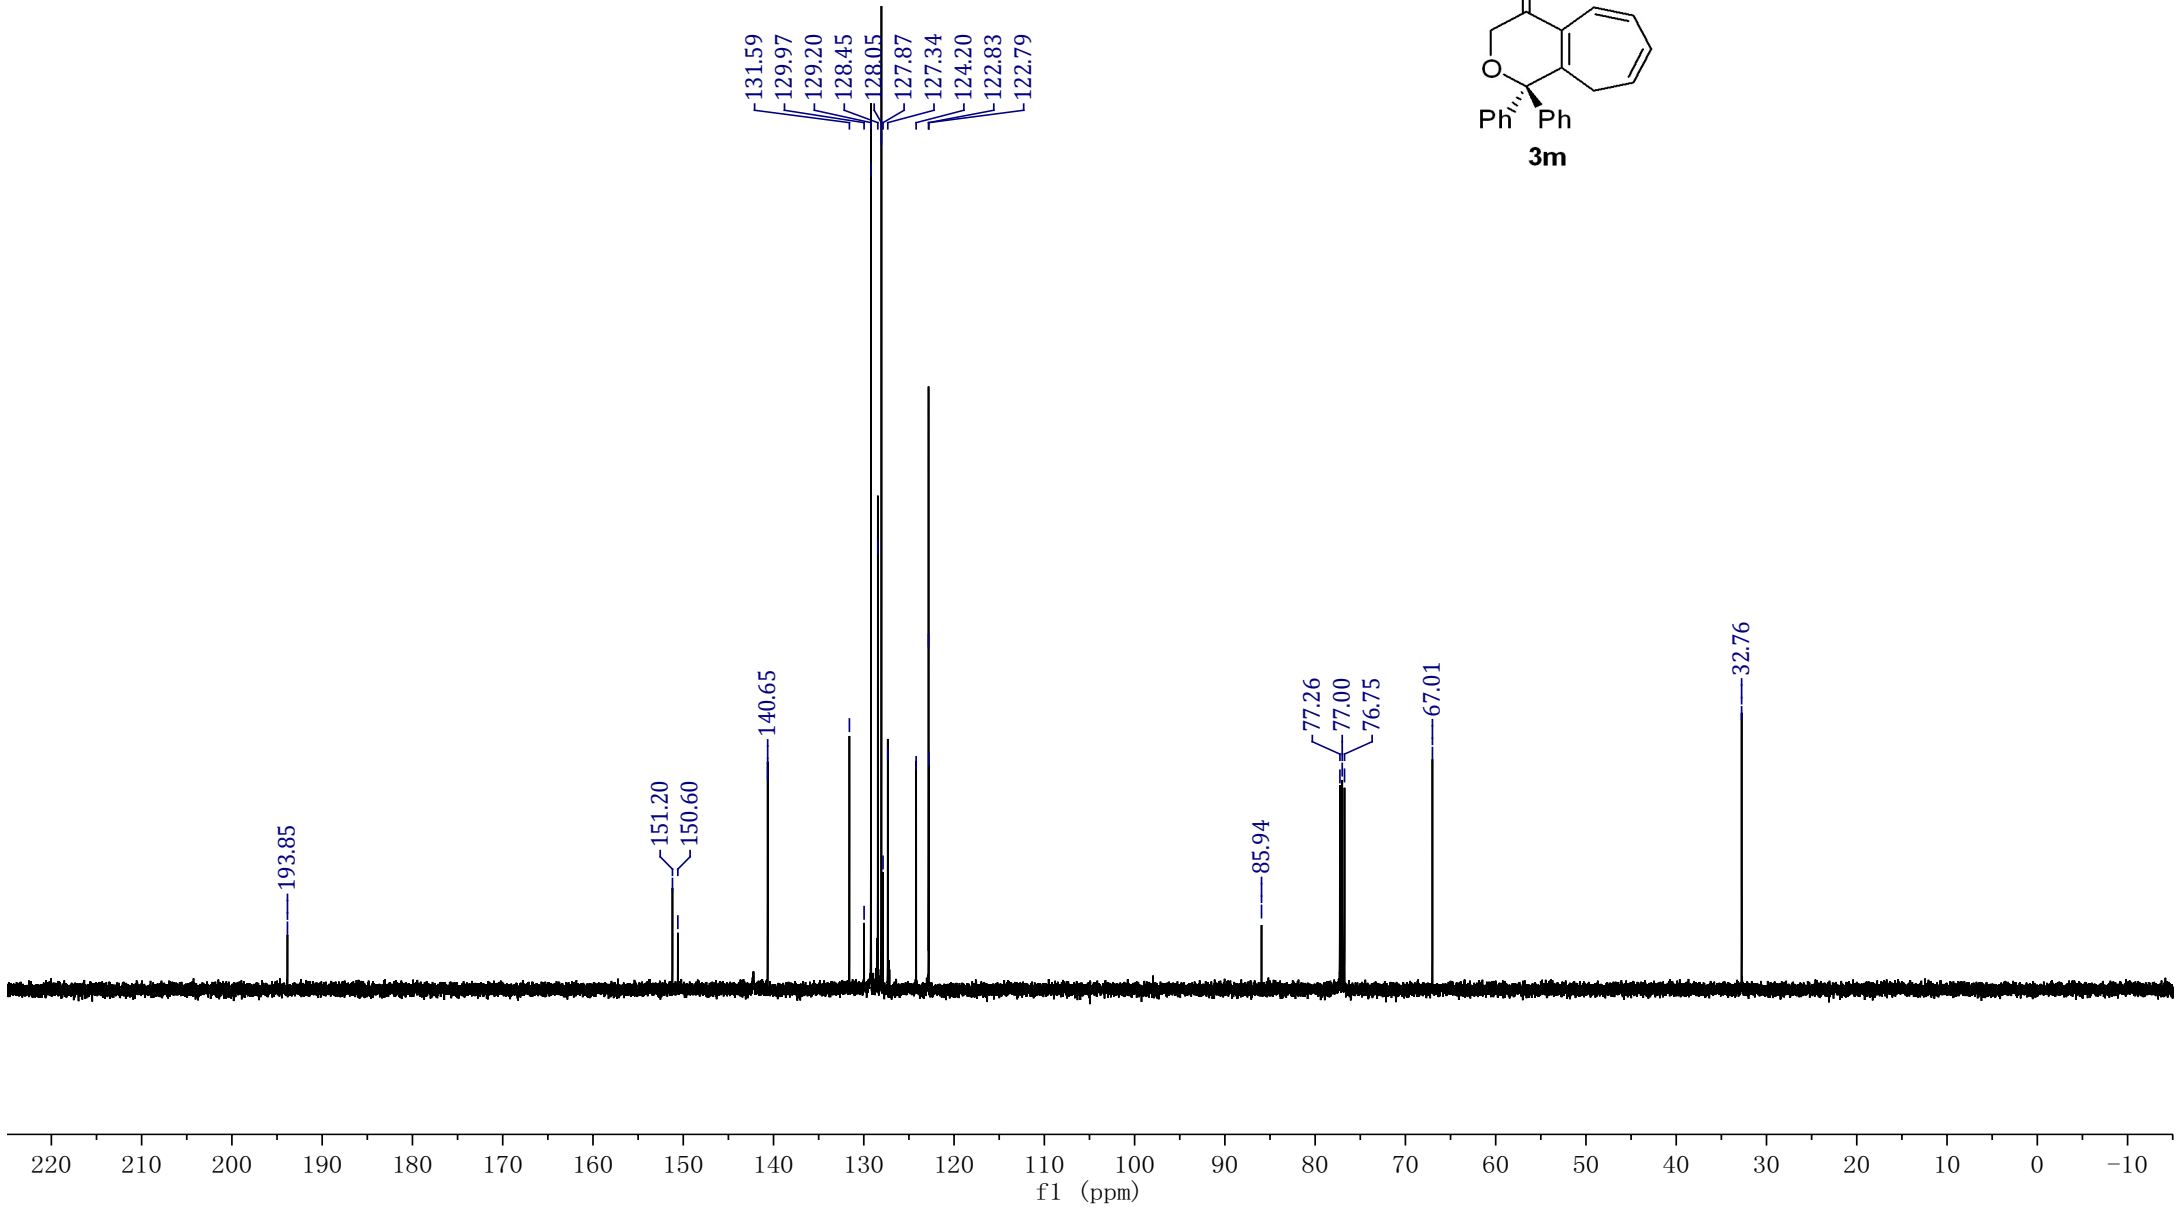

| Parameter                | Value        |
|--------------------------|--------------|
| 1 Title                  | jkg-VI-20A-H |
| 2 Solvent                | cdcl3        |
| 3 Temperature            | 25.0         |
| 4 Relaxation Delay       | 10.0000      |
| 5 Spectrometer Frequency | 599.64       |

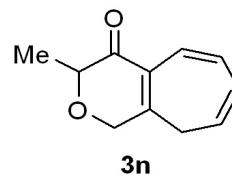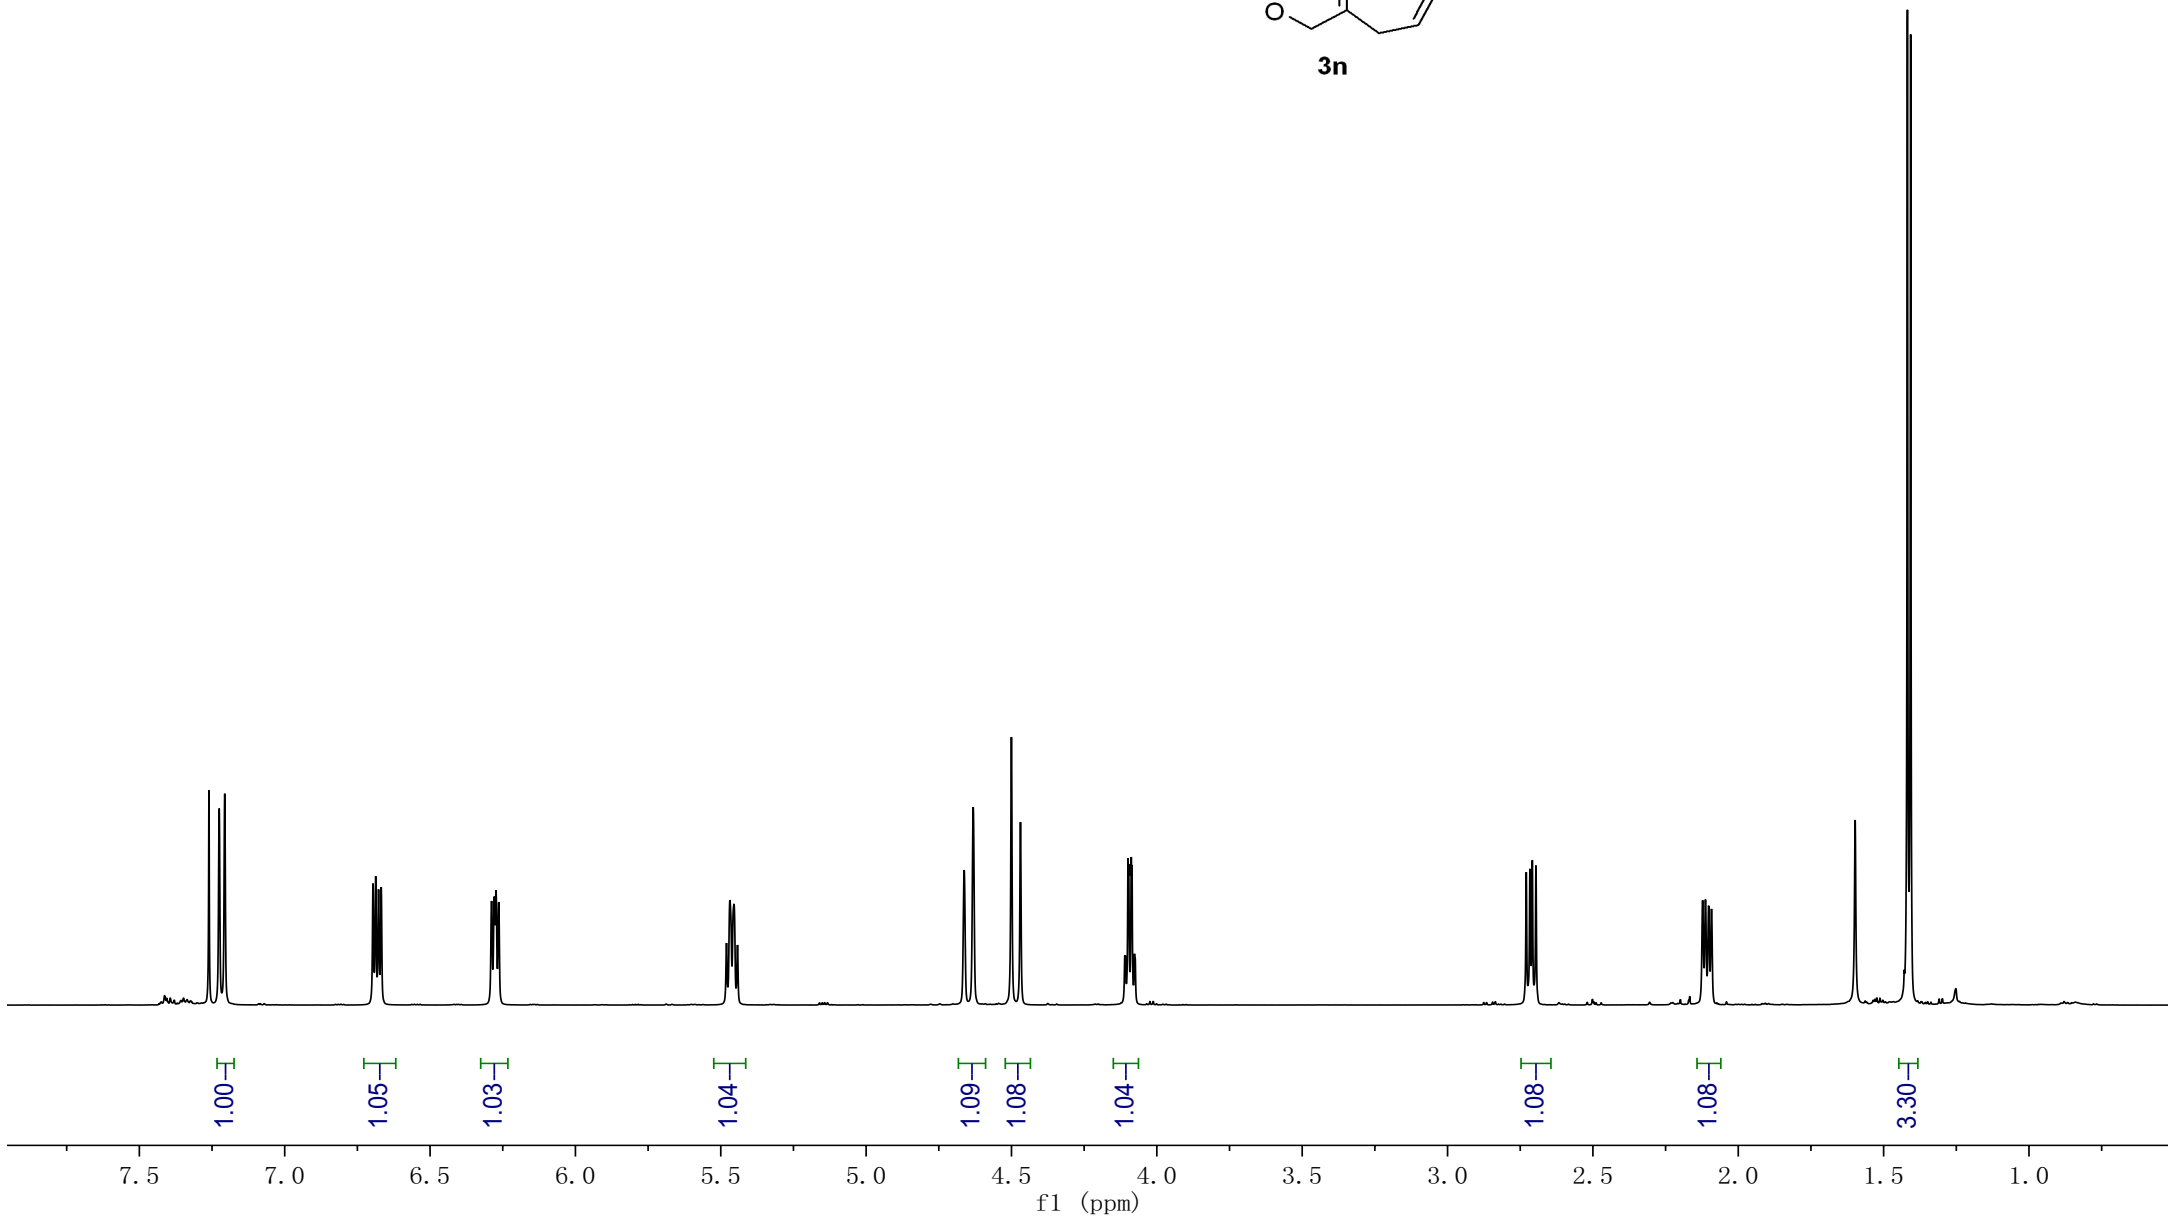

| Parameter                | Value        |
|--------------------------|--------------|
| 1 Title                  | jkg-VI-20A-C |
| 2 Solvent                | cdcl3        |
| 3 Temperature            | 25.0         |
| 4 Relaxation Delay       | 1.0000       |
| 5 Spectrometer Frequency | 150.79       |

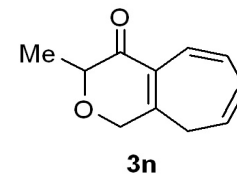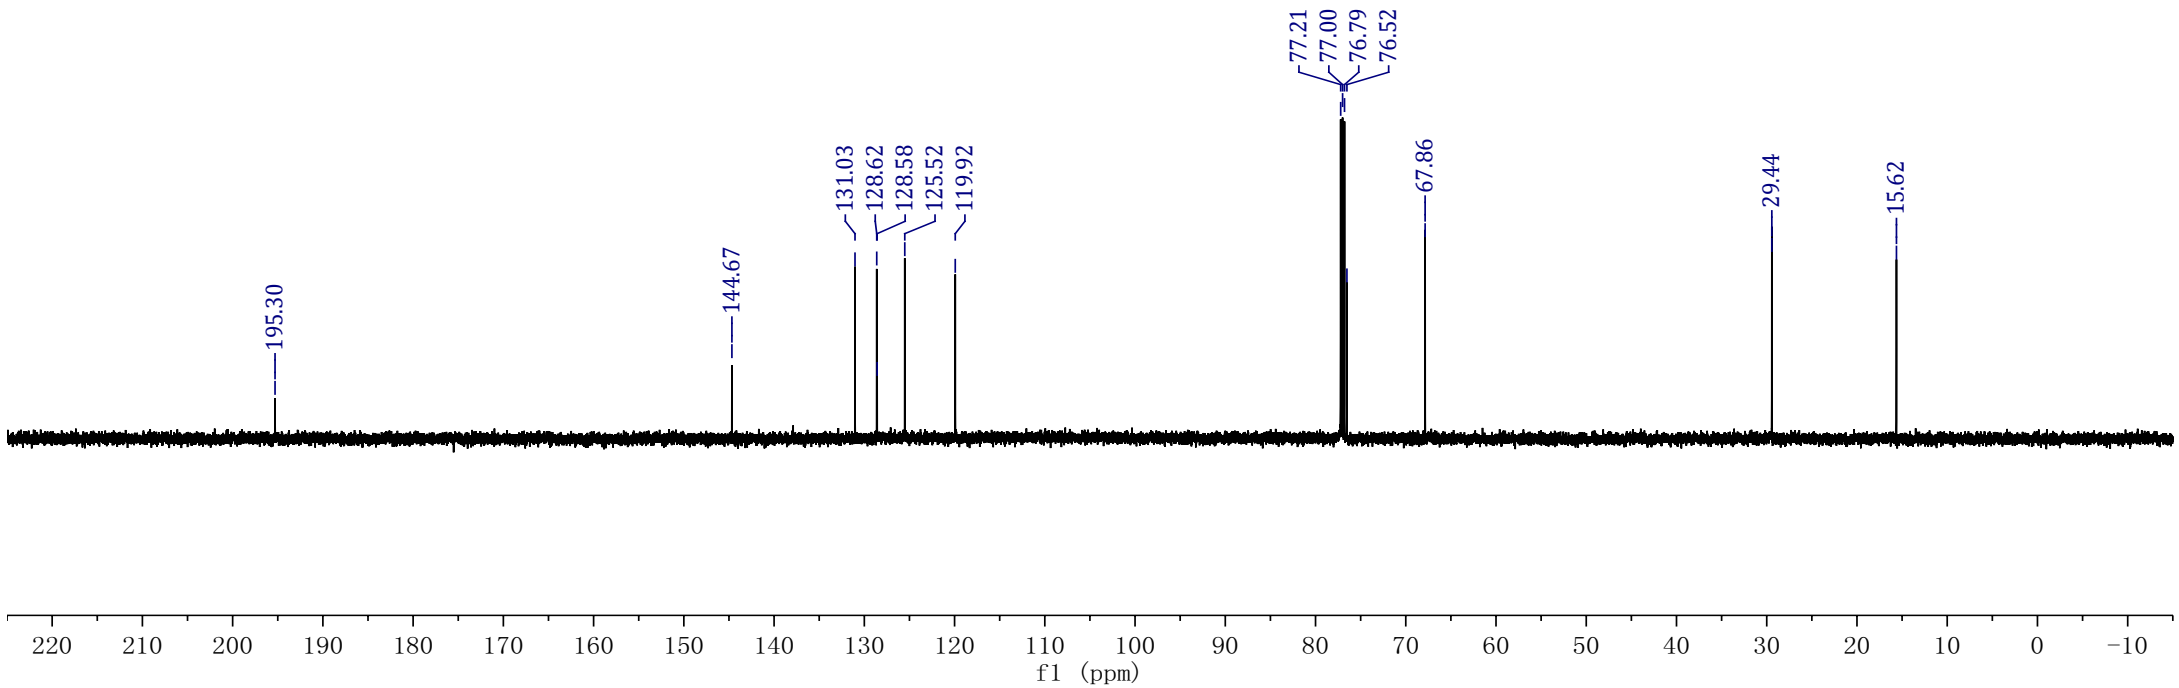

| Parameter                | Value          |
|--------------------------|----------------|
| 1 Title                  | jkg-VII-227D-H |
| 2 Solvent                | cdcl3          |
| 3 Temperature            | 26.0           |
| 4 Relaxation Delay       | 10.0000        |
| 5 Spectrometer Frequency | 399.78         |

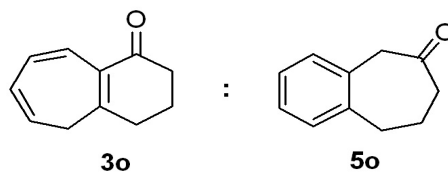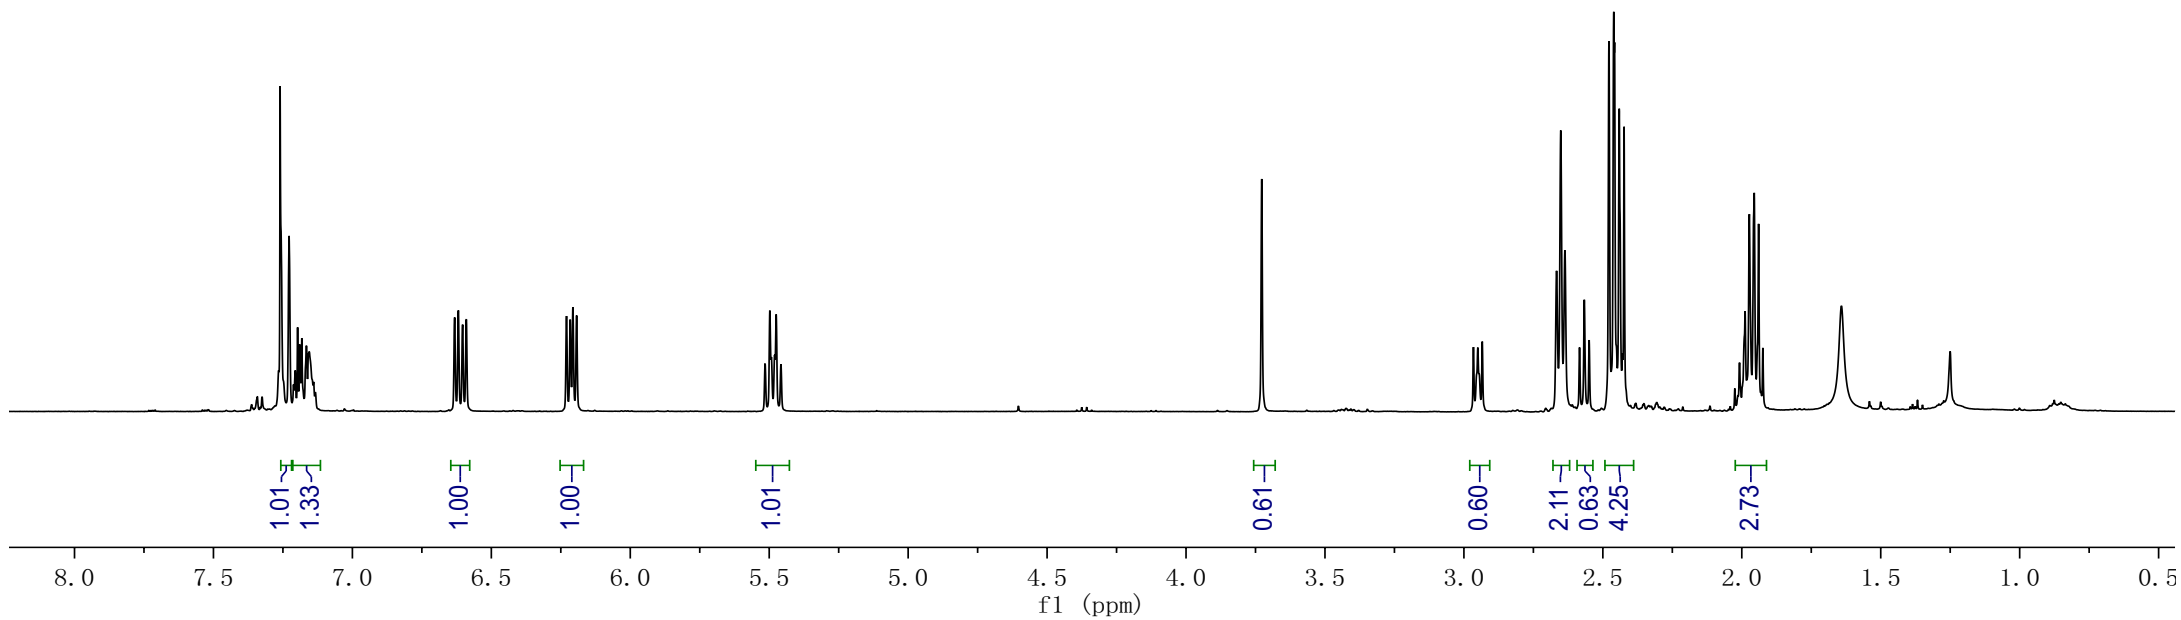

| Parameter                | Value            |
|--------------------------|------------------|
| 1 Title                  | jkg-VII-227D-C13 |
| 2 Solvent                | cdcl3            |
| 3 Temperature            | 26.0             |
| 4 Relaxation Delay       | 1.0000           |
| 5 Spectrometer Frequency | 100.53           |

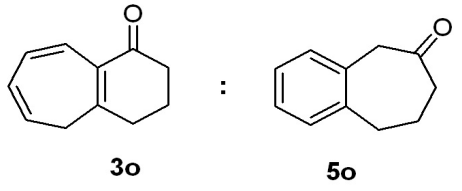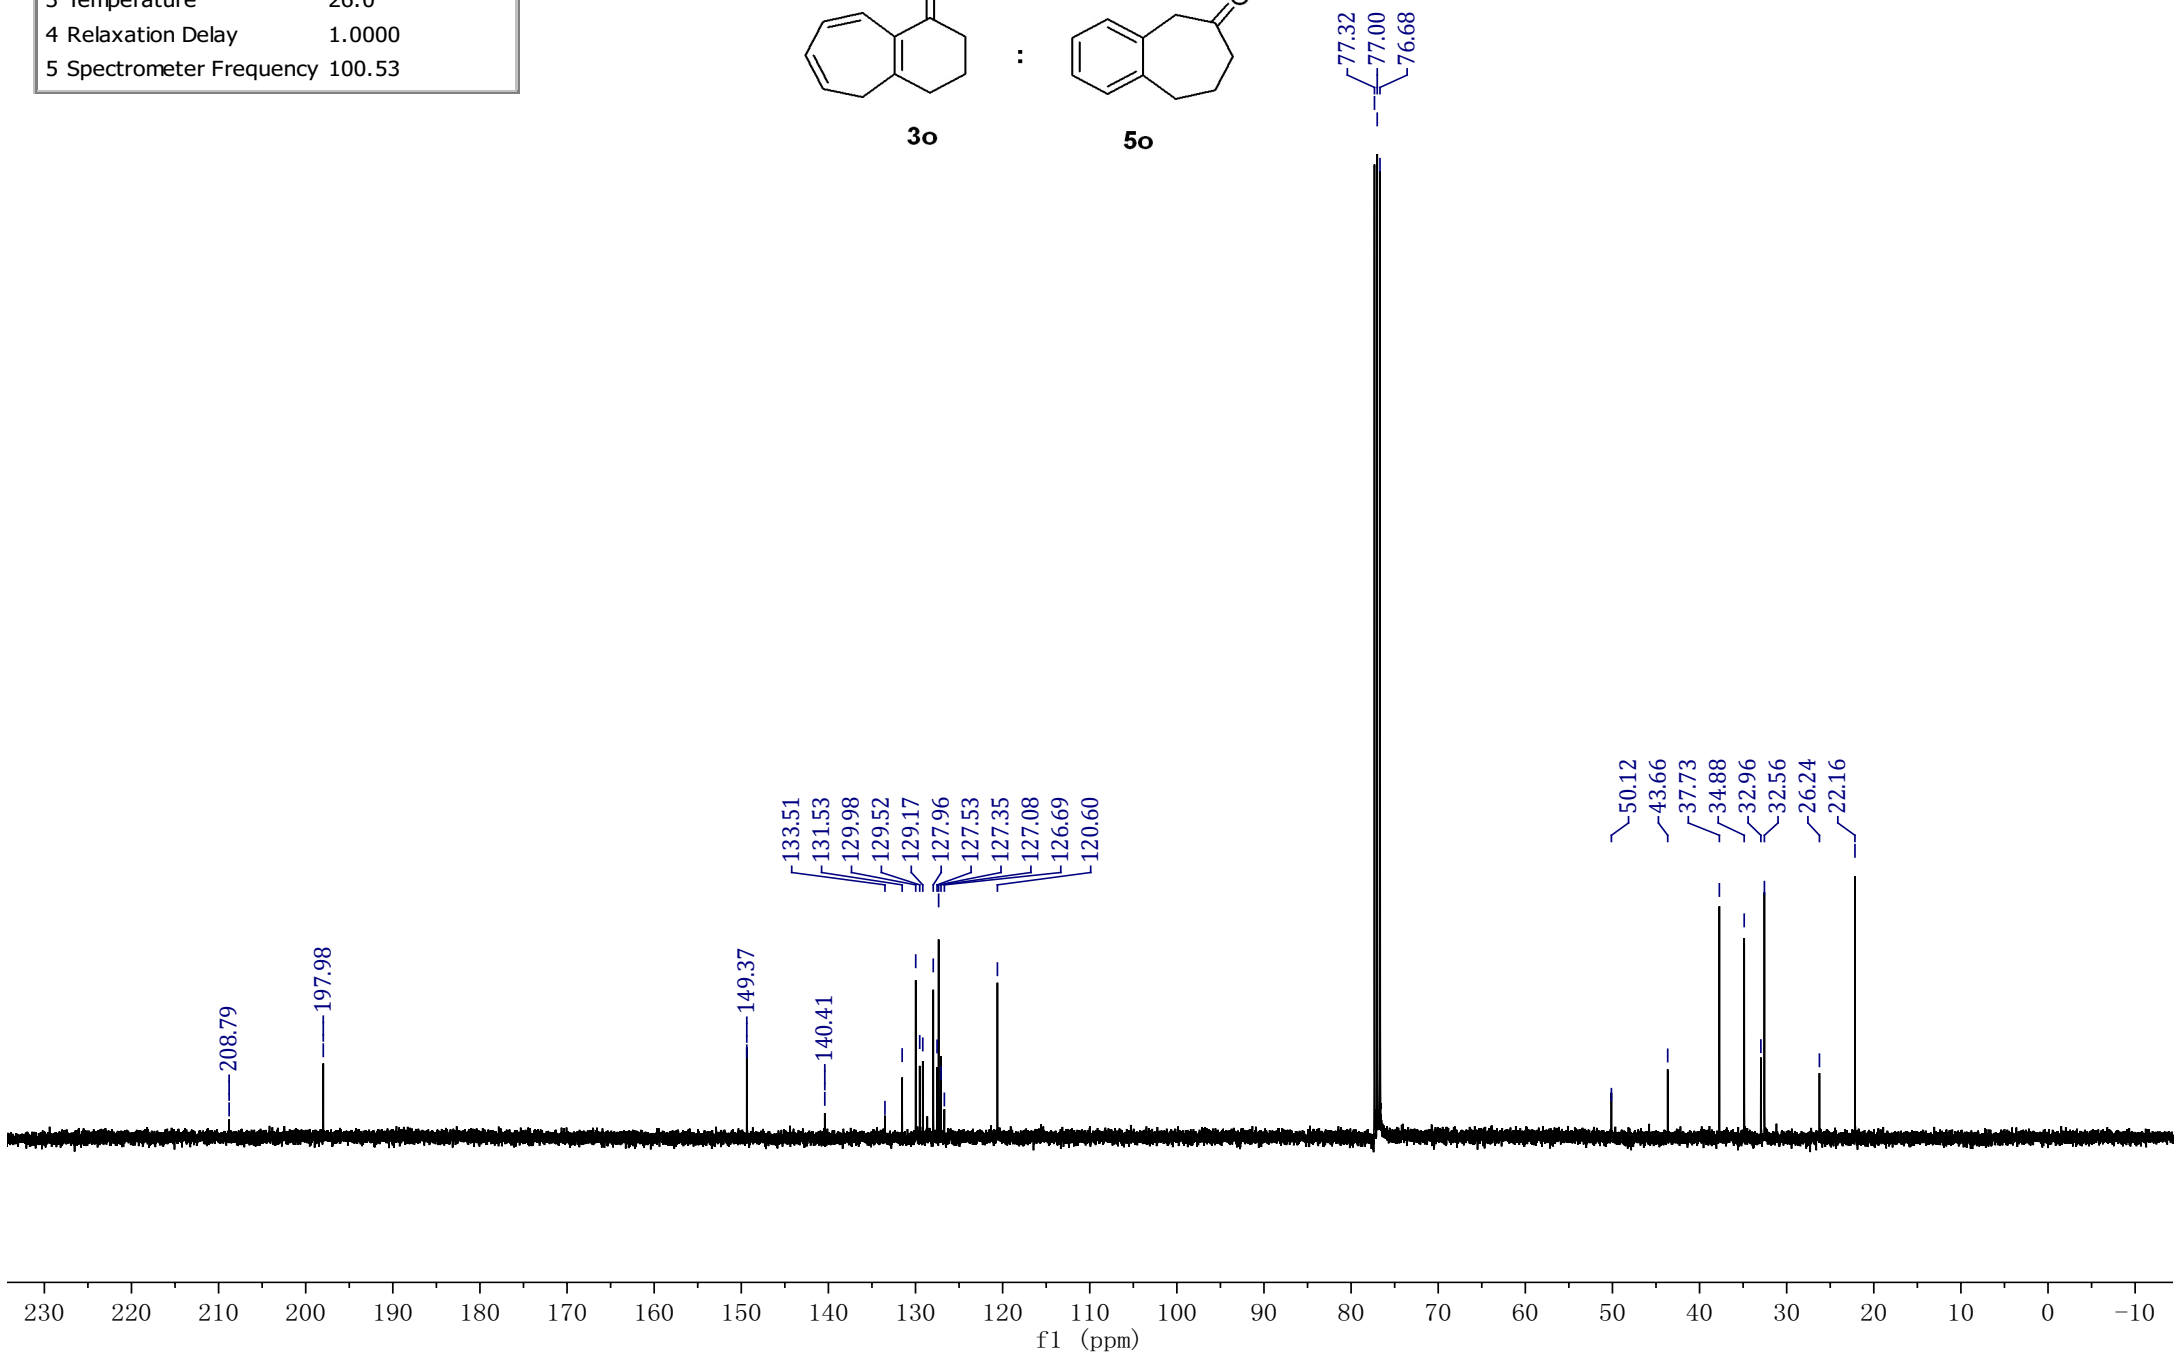



| Parameter                                 | Value (f2, f1)   |
|-------------------------------------------|------------------|
| 1 Title                                   | jkg-V-164-P-cosy |
| 2 Solvent                                 | cdcl3            |
| 3 Temperature                             | 25.0             |
| 4 Relaxation Delay                        | 1.0000           |
| 5 Spectrometer Frequency (599.63, 599.63) |                  |
| 6 Spectral Width                          | (3921.6, 3921.6) |

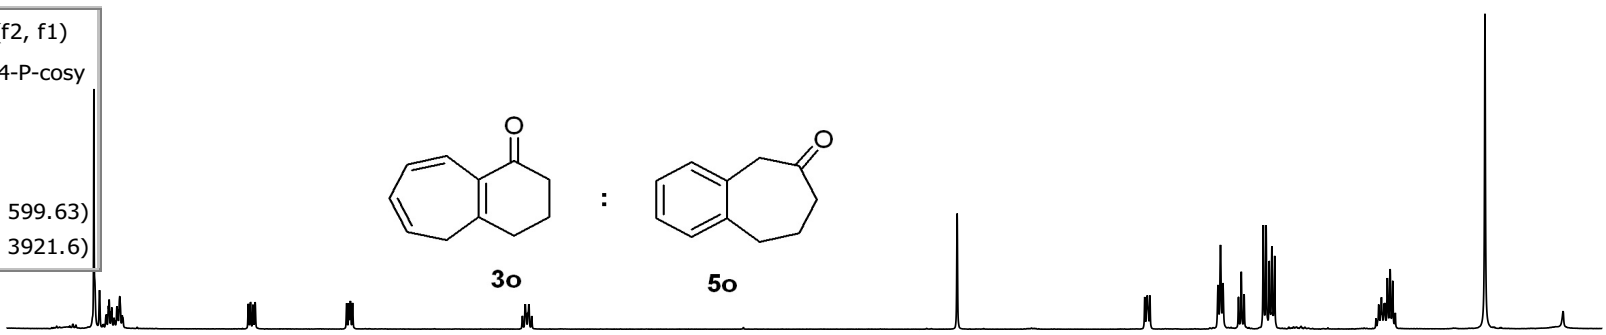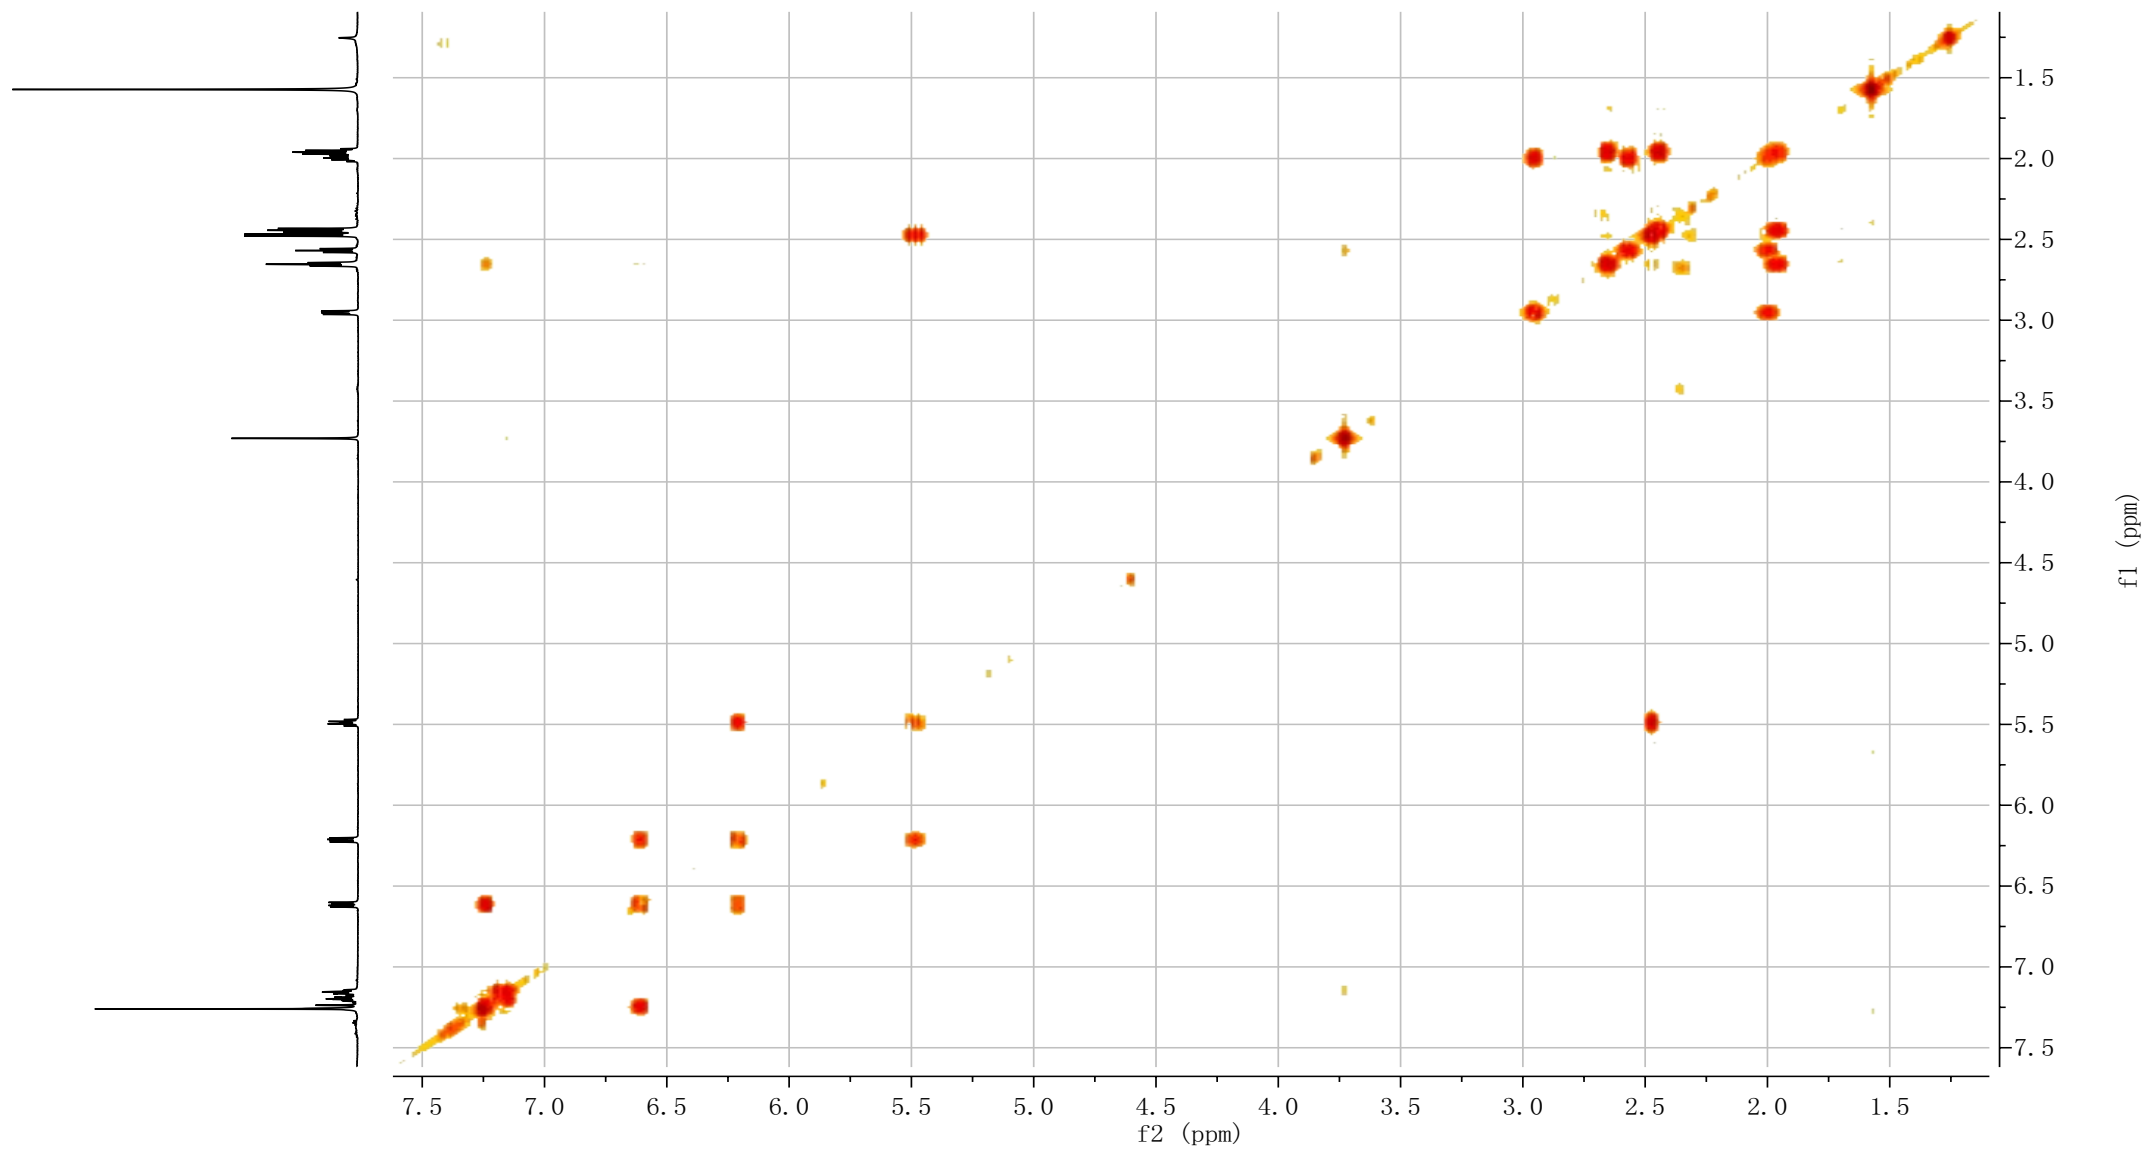

| Parameter                | Value          |
|--------------------------|----------------|
| 1 Title                  | jkg-VII-227C-H |
| 2 Solvent                | CDCl3          |
| 3 Temperature            | 80.0           |
| 4 Relaxation Delay       | 10.0000        |
| 5 Spectrometer Frequency | 499.86         |

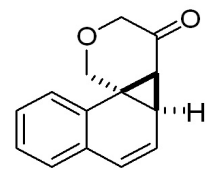

4p

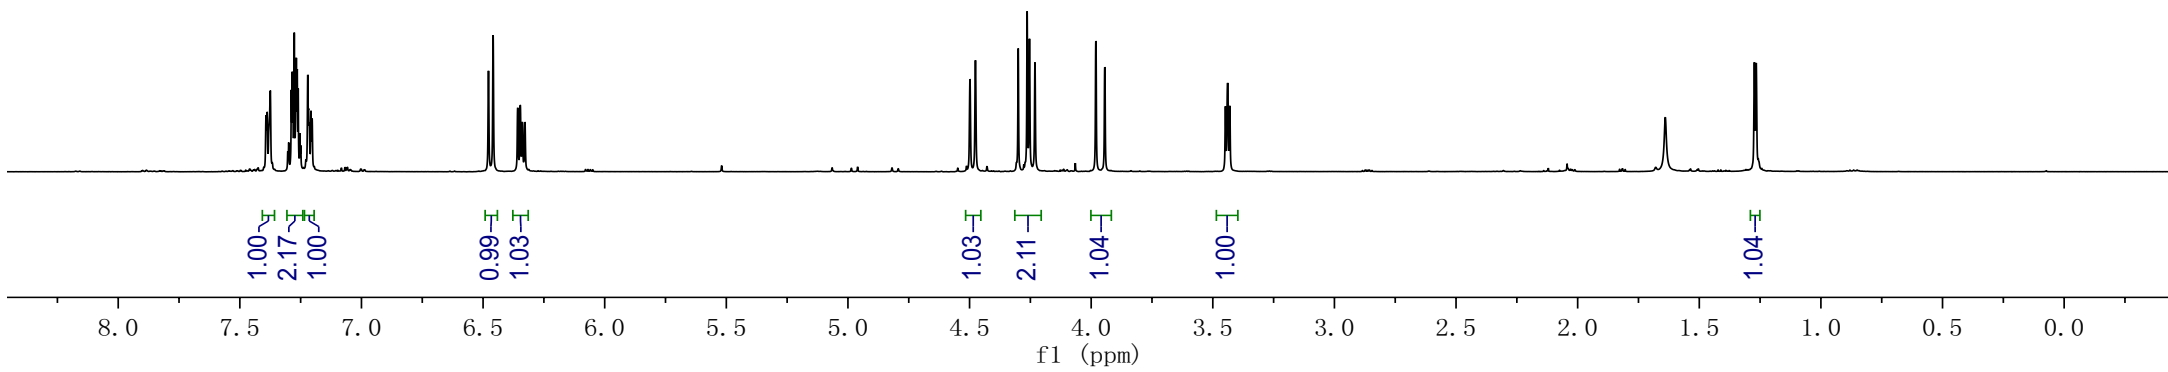

| Parameter                | Value            |
|--------------------------|------------------|
| 1 Title                  | jkg-VII-227C-C13 |
| 2 Solvent                | CDCl3            |
| 3 Temperature            | 80.0             |
| 4 Relaxation Delay       | 1.0000           |
| 5 Spectrometer Frequency | 125.70           |

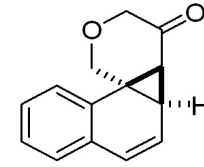

**4p**

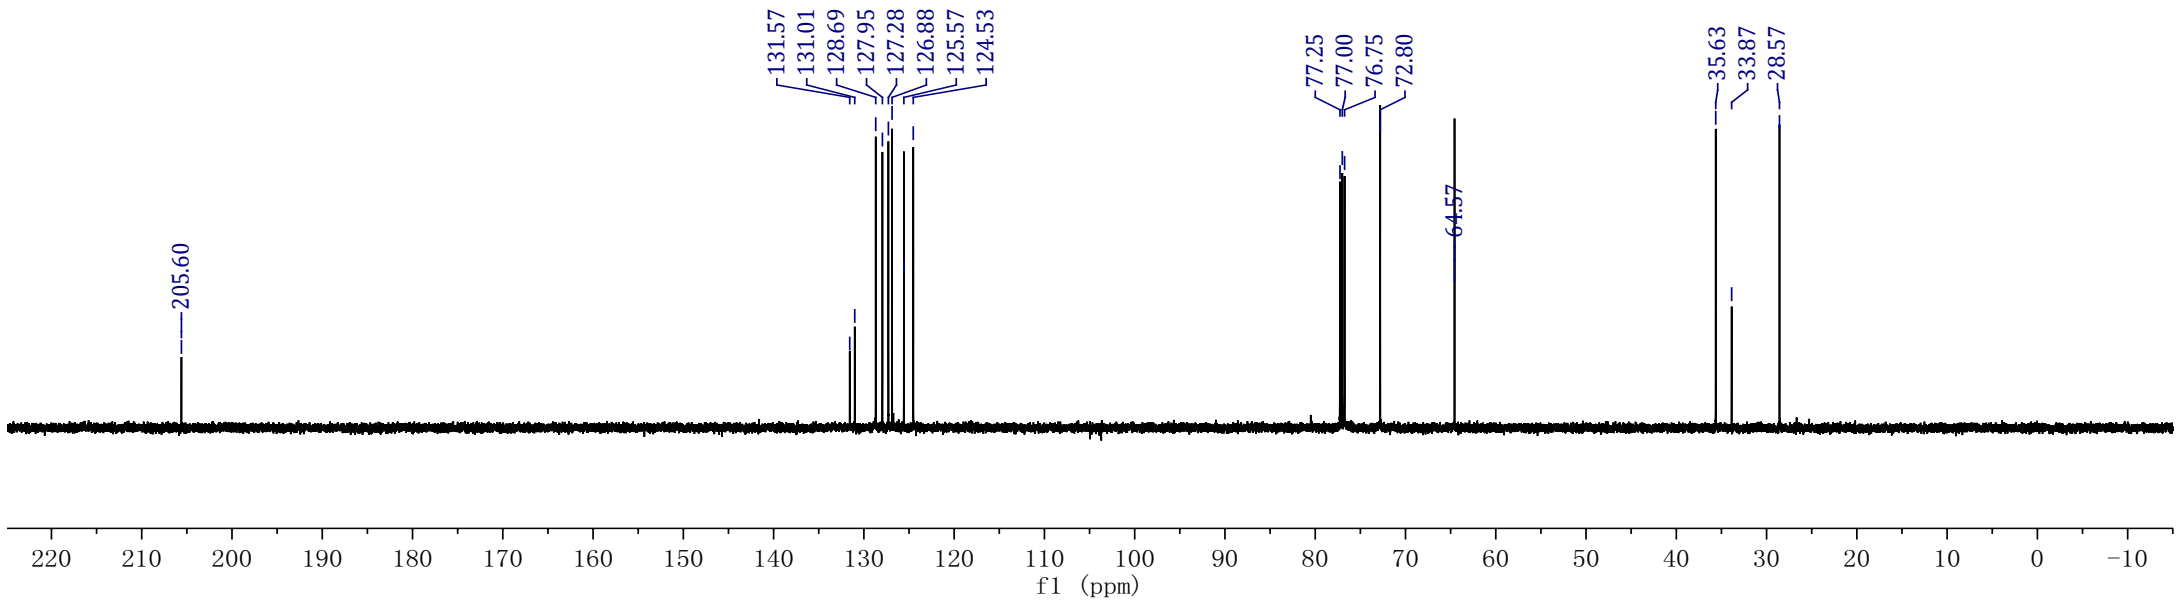

Parameter Value  
Title jkg-VI-73-H  
Solvent CDCl3  
Spectrometer Frequency 499.86

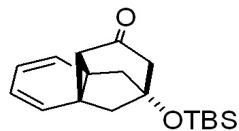

4q

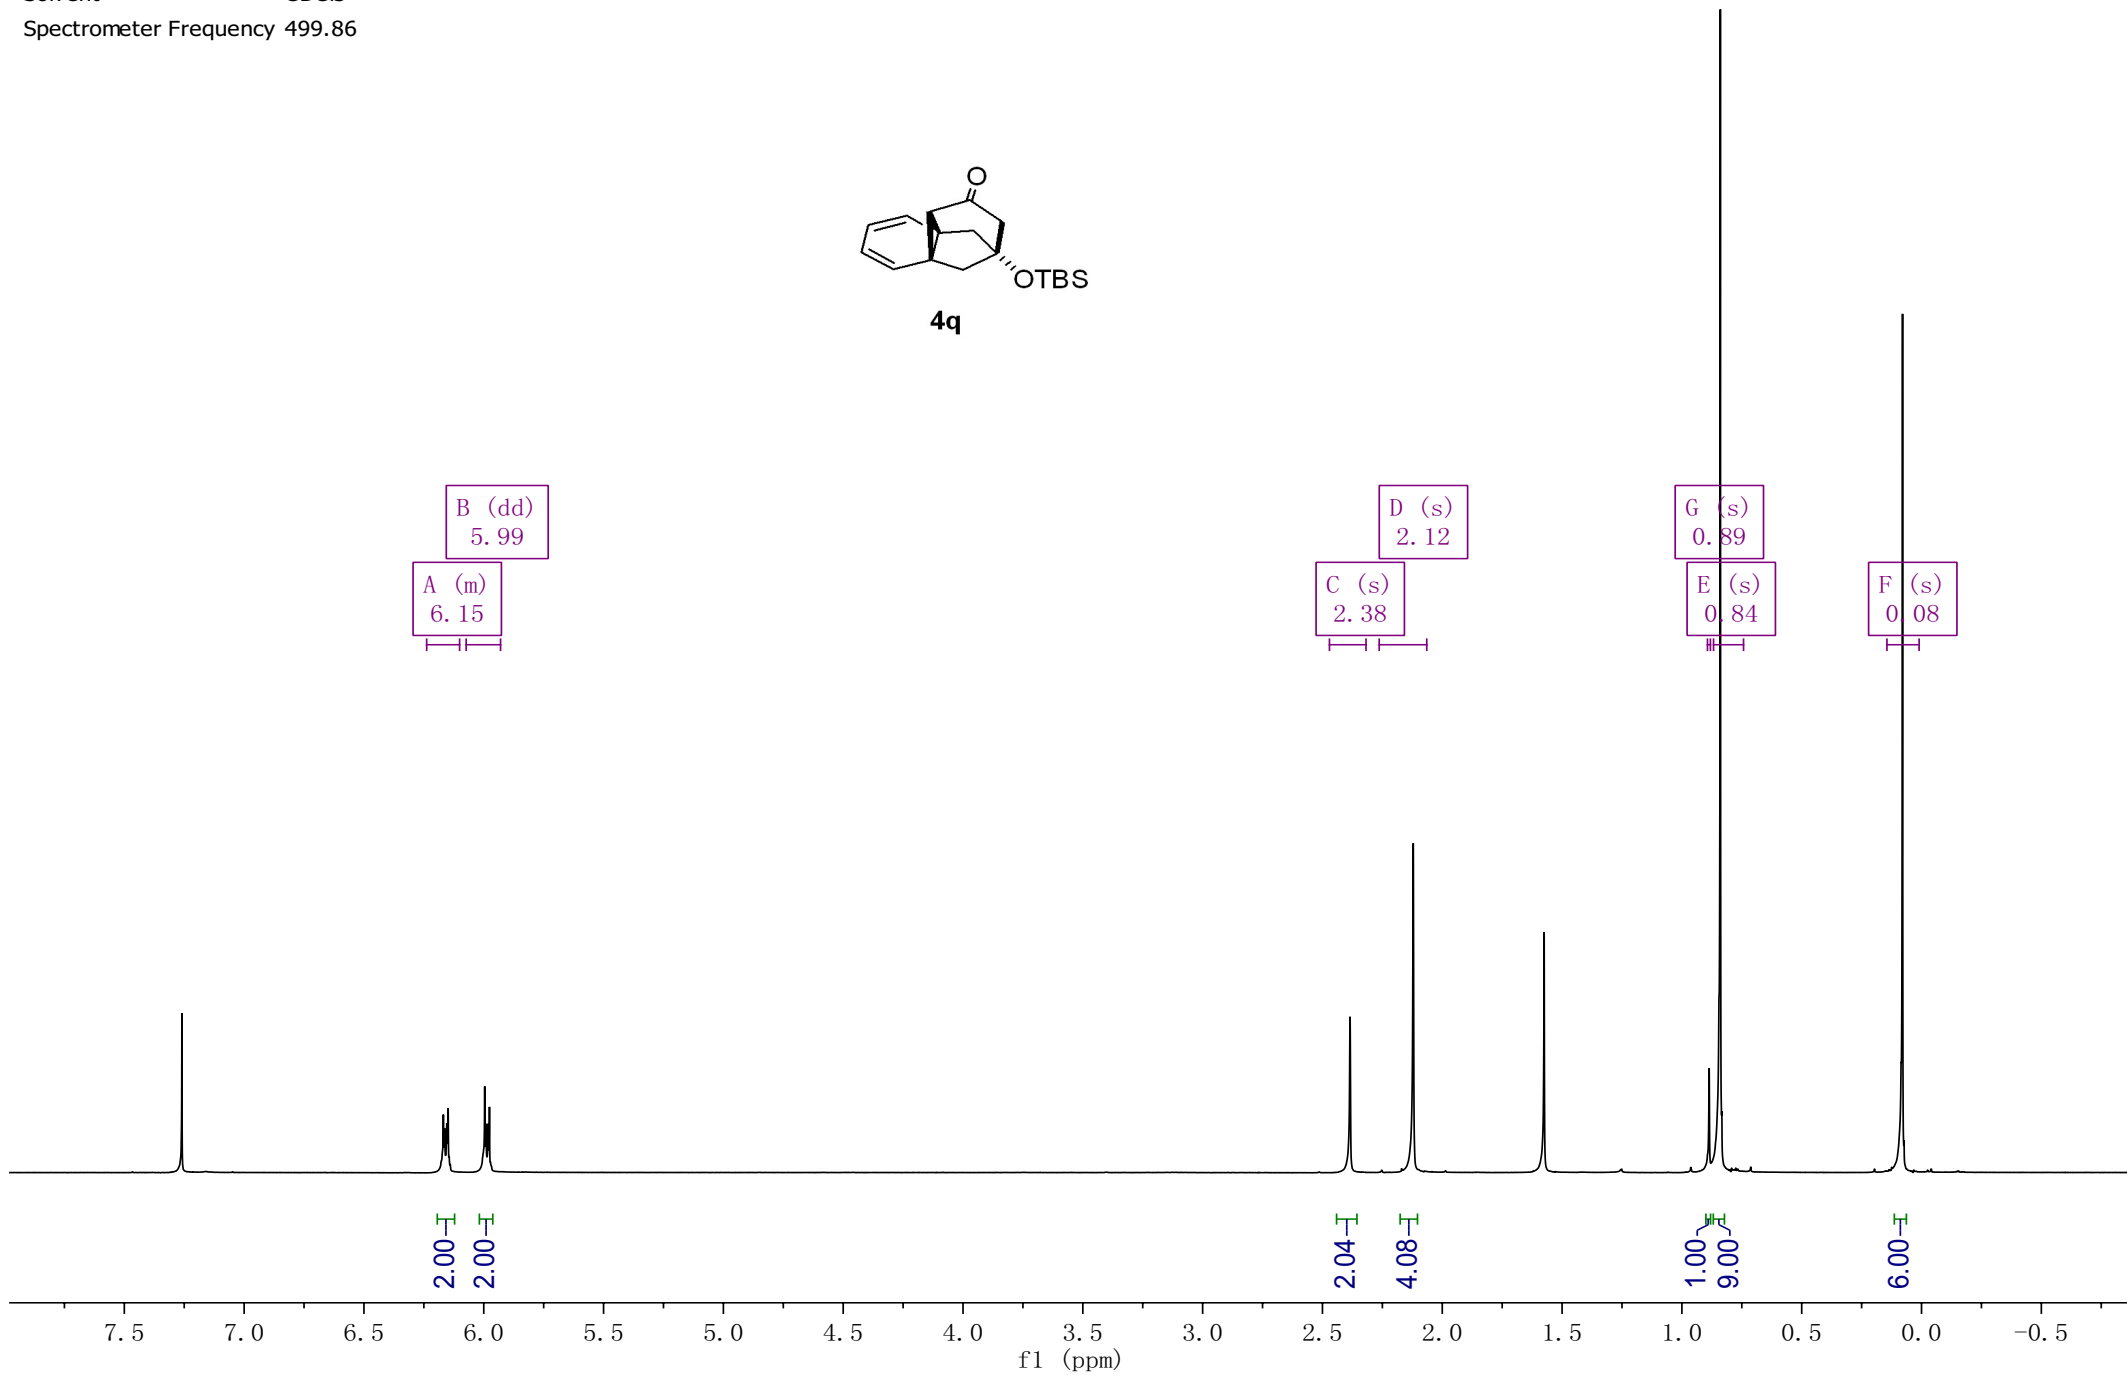

Parameter Value  
Title jkg-VI-73-C  
Solvent CDCl<sub>3</sub>  
Spectrometer Frequency 125.70

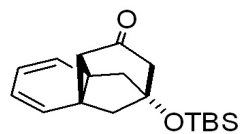

4q

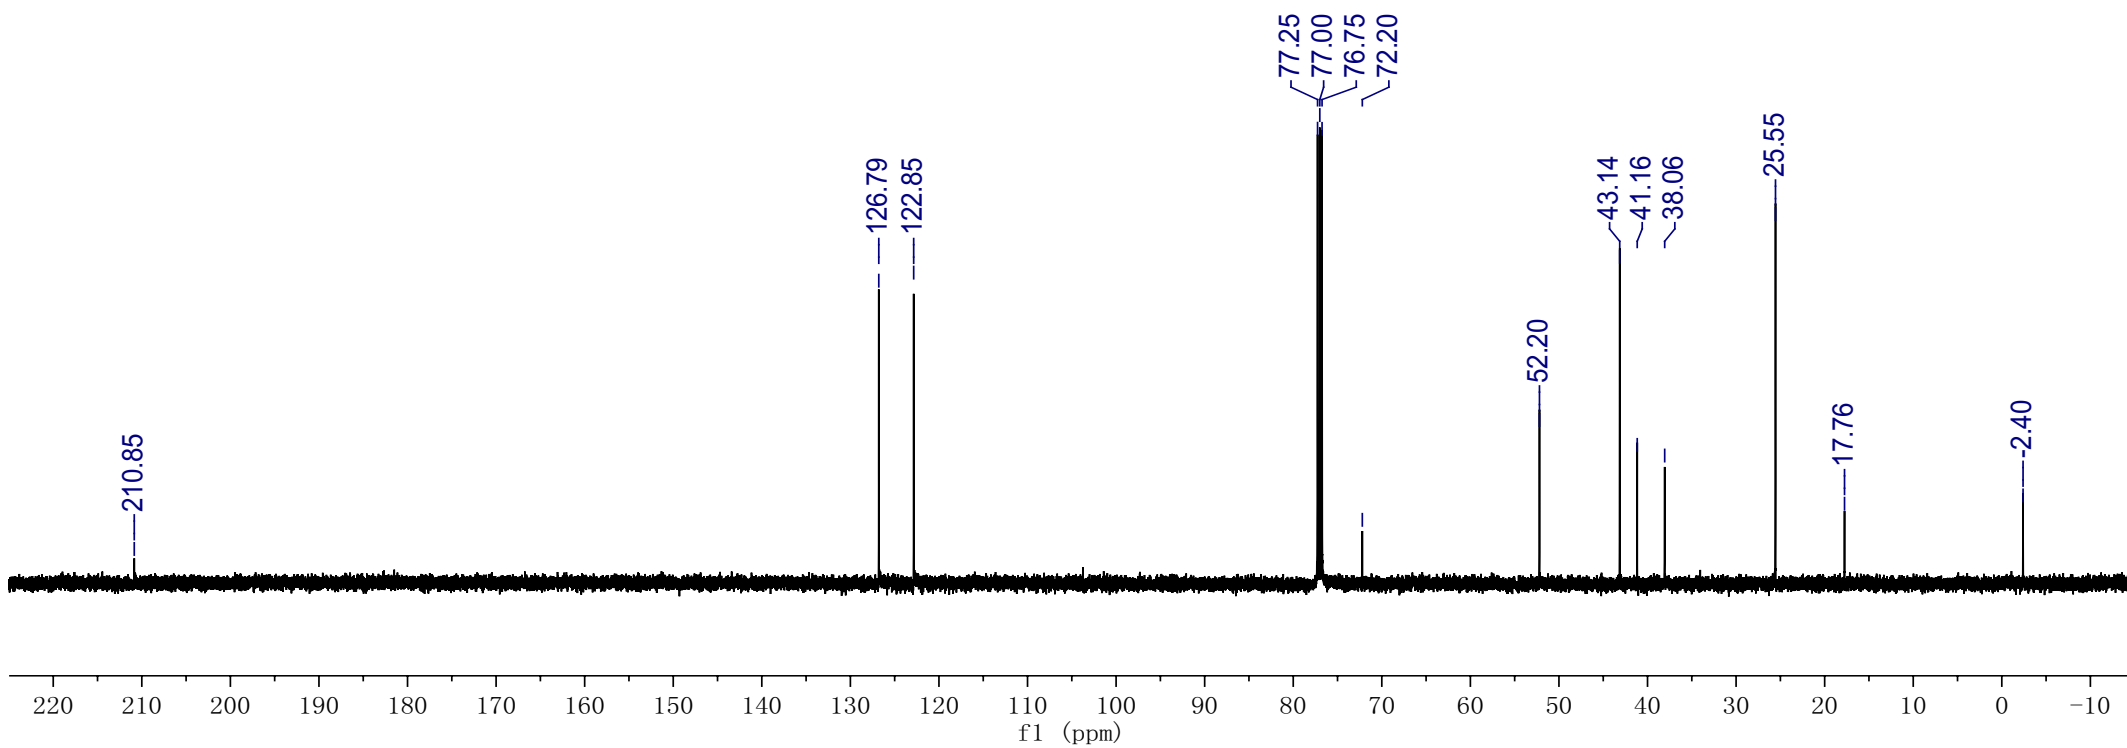

Supplement: NIHMS977453-supplement-supporting_information.pdf [file NIHMS977453-supplement-supporting_information.pdf]
